# Supplementary material for: Tunable synthesis of chalcophosphinic amides and tertiary phosphinates using tert-butyl N,N-dialkylperoxyamidate
Source: Royal Society of Chemistry journal article supplement (doi:10.1039/d1qo00542a), 2021-01-01

*Electronic Supplementary Information (ESI)*

# **Tunable Synthesis of Chalcophosphinic Amides and Tertiary Phosphinates Using *tert*-Butyl *N*, *N*-Dialkylperoxyamidate**

Kun Liu,<sup>a†</sup> XueXue Chang,<sup>a†</sup> Yimiao He,<sup>\*a</sup> Zhongfu Su,<sup>a</sup> Yanmin Huang,<sup>\*a</sup> Chusheng Huang,<sup>a</sup> Jian Lei<sup>\*b</sup> and Qiang Zhu<sup>a</sup>

<sup>a</sup> *Guangxi Key Laboratory of Natural Polymer Chemistry and Physics, College of Chemistry and Materials, Nanning Normal University, Nanning 530001, P. R. China.*

<sup>b</sup> *College of Chemical Engineering and Materials Science, Quanzhou Normal University, Quanzhou 362000, P.R. China.*

## **Table of contents**

|                                                                                           |    |
|-------------------------------------------------------------------------------------------|----|
| 1. General information .....                                                              | 2  |
| 2. General procedure and product characterization .....                                   | 2  |
| 2.1 General procedure .....                                                               | 2  |
| 2.2 Product Characterization.....                                                         | 3  |
| 3. Mechanistic studies .....                                                              | 18 |
| 3.1 The radical-trapping experiment .....                                                 | 18 |
| 3.2 Exploring possible reaction pathway .....                                             | 19 |
| 4. References.....                                                                        | 20 |
| 5. Copies of <sup>1</sup> H NMR, <sup>13</sup> C NMR and <sup>31</sup> P NMR Spectra..... | 21 |

## 1. General information

Reactions were monitored by using thin-layer chromatography (TLC) on commercial silica gel plates (GF254). Visualization of the developed plates was performed under UV lights (254 nm). Flash column chromatography was performed on silica gel (200-300 mesh).  $^1\text{H}$ ,  $^{13}\text{C}$  and  $^{31}\text{P}$  NMR spectra were recorded on a Bruker AV300, 400 and 500 spectrometer. Chemical shifts ( $\delta$ ) were reported in ppm referenced to the  $\text{CDCl}_3$  residual peak ( $\delta$  7.26) or the  $\text{DMSO-d}_6$  residual peak ( $\delta$  2.50) for  $^1\text{H}$  NMR. Chemical shifts of  $^{13}\text{C}$  NMR were reported relative to  $\text{CDCl}_3$  ( $\delta$  77.0) or  $\text{D}_6\text{-DMSO}$  ( $\delta$  39.5). Chemical shifts of  $^{31}\text{P}$  NMR were reported relative to 85%  $\text{H}_3\text{PO}_4$  ( $\delta$  = 0). The following abbreviations were used to describe peak splitting patterns when appropriate: br s = broad singlet, s = singlet, d = doublet, t = triplet, q = quartet, m = multiplet. Coupling constant,  $J$ , was reported in Hertz unit (Hz). Melting points (mp) were taken on a MEL-TEMP® apparatus and were uncorrected. High resolution mass spectra (HRMS) were obtained on an ESI-LC-MS/MS spectrometer.

## 2. General procedure and product characterization

### 2.1 General procedure

**Procedure A:** Typical procedure for the synthesis of chalcophosphinic amides **3**.

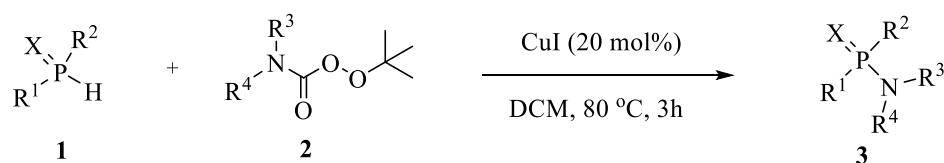

A 15 mL schlenk tube was charged with a mixture of **1** (0.2 mmol), **2** (0.6 mmol), catalyst (0.04 mmol) in DCM (1.0 mL) and was stirred at 80 °C for 3 h. After the reaction was complete (as determined by TLC analysis), the reaction was cooled to room temperature and EtOAc (20 mL) was added to the solution and washed with brine, dried over  $\text{Na}_2\text{SO}_4$ , concentrated under reduced pressure. The crude product was purified by column chromatography on silica gel (ethanol/hexane = 1:10) to afford the targeted products **3**.

### Procedure B: Typical procedure for the synthesis of phosphinates **4**.

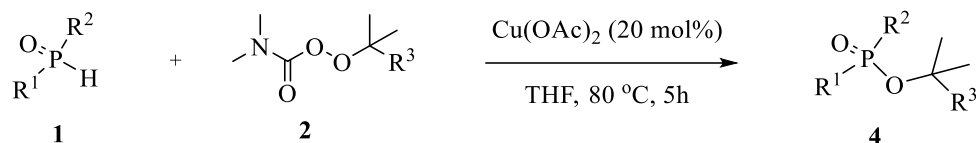

A 15 mL schlenk tube was charged with a mixture of **1** (0.2 mmol), **2** (0.6 mmol), catalyst (0.04 mmol) in THF (1.0 mL) and was stirred at 80 °C for 5 h. After the reaction was complete (as determined by TLC analysis), the reaction was cooled to room temperature and EtOAc (20 mL) was added to the solution and washed with brine, dried over Na<sub>2</sub>SO<sub>4</sub>, concentrated under reduced pressure. The crude product was purified by column chromatography on silica gel (EtOAc/hexane = 1:2) to afford the targeted products **4**.

### Procedure C: Gram-scale synthesis of phosphinates **4a**.

A 100 mL schlenk tube was charged with a mixture of **1a** (5.0 mmol), **2a** (15.0 mmol), catalyst (1.0 mmol) in THF (20.0 mL) and was stirred at 80 °C for 5 h. After the reaction was complete (as determined by TLC analysis), the reaction was cooled to room temperature and EtOAc (100 mL) was added to the solution and washed with brine, dried over Na<sub>2</sub>SO<sub>4</sub>, concentrated under reduced pressure. The crude product was purified by column chromatography on silica gel (EtOAc/hexane = 1:2) to afford the targeted products **4a** in 78% yield.

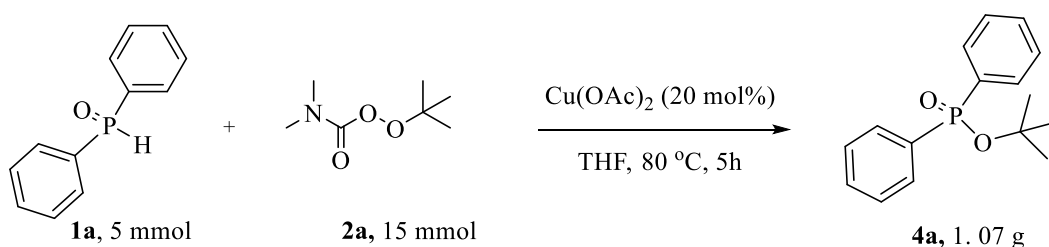

## 2.2 Product Characterization

### N,N-dimethyl-1,1-diphenylphosphanamine (**3a**)<sup>1</sup>

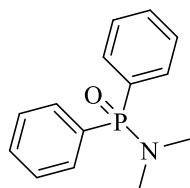

Following procedure A, which purified using mixture of ethanol/hexane (1:10) as

eluent, obtained (39.2 mg, 80% yield) as a white solid; Mp 73-74 °C. <sup>1</sup>H NMR (300 MHz, DMSO): δ 7.82-7.75 (m, 4H), 7.60-7.48 (m, 6H), 2.55 (s, 3H), 2.52 (s, 3H); <sup>13</sup>C NMR (100 MHz, CDCl<sub>3</sub>): δ 132.5, 132.4, 132.3, 131.8, 131.7, 131.2, 128.6, 128.5, 37.2, 37.1; <sup>31</sup>P NMR (162 MHz, CDCl<sub>3</sub>): δ 31.40; HRMS (ESI): Exact mass calcd for C<sub>14</sub>H<sub>16</sub>NOP [M+Na]<sup>+</sup>: 268.0682; Found: 268.0683.

### **N,N-dimethyl-P-(m-tolyl)-P-(p-tolyl)phosphinic amide (3b)**

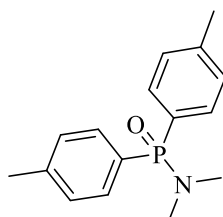

Following procedure A, which purified using mixture of ethanol/hexane (1:10) as eluent, obtained (44.8 mg, 82% yield) as a yellow oil. <sup>1</sup>H NMR (500 MHz, CDCl<sub>3</sub>): δ 7.73 (dd, *J* = 11.5, 8.0, 4H), 7.27-7.24 (m, 4H), 2.65 (s, 3H), 2.63 (s, 3H), 2.37 (s, 6H); <sup>13</sup>C NMR (125 MHz, CDCl<sub>3</sub>): δ 137.9, 137.8, 135.1, 134.0, 133.2, 128.9, 128.8, 31.0, 21.3; <sup>31</sup>P NMR (202 MHz, CDCl<sub>3</sub>): δ 27.18; HRMS (ESI): Exact mass calcd for C<sub>16</sub>H<sub>20</sub>NOP [M+H]<sup>+</sup>: 274.1355; Found: 274.1356.

### **P,P-bis(4-(tert-butyl)phenyl)-N,N-dimethylphosphinic amide (3c)**

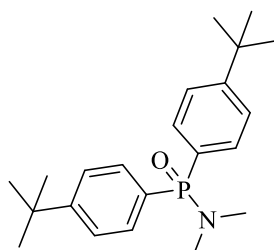

Following procedure A, which purified using mixture of ethanol/hexane (1:10) as eluent, obtained (60.8 mg, 85% yield) as a white solid; Mp 132-134 °C. White solid. <sup>1</sup>H NMR (300 MHz, CDCl<sub>3</sub>): δ 7.80-7.75 (m, 4H), 7.47-7.44 (m, 4H), 2.67 (s, 3H), 2.64 (s, 3H), 1.31 (s, 18H); <sup>13</sup>C NMR (100 MHz, CDCl<sub>3</sub>): δ 155.0, 132.3, 132.2, 129.4, 128.1, 125.6, 125.4, 37.2, 37.1, 34.9, 31.1; <sup>31</sup>P NMR (162 MHz, CDCl<sub>3</sub>): δ 31.56; HRMS (ESI): Exact mass calcd for C<sub>22</sub>H<sub>32</sub>NOP [M+H]<sup>+</sup>: 358.2294; Found: 358.2293.

### **P,P-bis(4-fluorophenyl)-N,N-dimethylphosphinic amide (3d)**

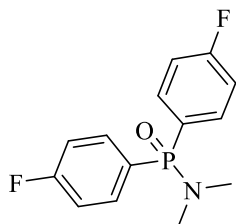

Following procedure A, which purified using mixture of ethanol/hexane (1:10) as eluent, obtained (46.1 mg, 82% yield) as a yellow solid; Mp 88-89 °C.  $^1\text{H}$  NMR (300 MHz, DMSO):  $\delta$  7.88-7.80 (m, 4H), 7.40-7.33 (m, 4H), 2.54 (s, 6H);  $^{13}\text{C}$  NMR (100 MHz,  $\text{CDCl}_3$ ):  $\delta$  165.1 (d,  $^1J_{\text{CF}} = 251.8$  Hz), 134.8 (dd,  $^3J_{\text{CF}} = 10.3$  Hz,  $^3J_{\text{CF}} = 8.9$  Hz), 127.0, 116.0 (dd,  $^2J_{\text{CF}} = 21.1$  Hz,  $^2J_{\text{CF}} = 13.6$  Hz), 37.1;  $^{31}\text{P}$  NMR (162 MHz,  $\text{CDCl}_3$ ):  $\delta$  29.53;  $^{19}\text{F}$  NMR (376 MHz,  $\text{CDCl}_3$ )  $\delta$  -107.03; HRMS (ESI): Exact mass calcd for  $\text{C}_{14}\text{H}_{14}\text{F}_2\text{NOP}$   $[\text{M}+\text{H}]^+$ : 282.0854; Found: 282.0854.

### **P,P-bis(4-chlorophenyl)-N,N-dimethylphosphinic amide (3e)**

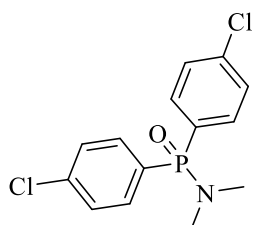

Following procedure A, which purified using mixture of ethanol/hexane (1:10) as eluent, obtained (47.1 mg, 75% yield) as a yellow oil.  $^1\text{H}$  NMR (300 MHz, DMSO):  $\delta$  7.82-7.75 (m, 4H), 7.60 (dd,  $J = 8.7$  Hz, 2.4 Hz, 4H), 2.55 (s, 3H), 2.52 (s, 3H);  $^{13}\text{C}$  NMR (100 MHz,  $\text{CDCl}_3$ ):  $\delta$  138.6, 133.8, 133.7, 130.6, 129.3, 129.2, 129.0, 37.1;  $^{31}\text{P}$  NMR (162 MHz,  $\text{CDCl}_3$ ):  $\delta$  29.60; HRMS (ESI): Exact mass calcd for  $\text{C}_{14}\text{H}_{14}\text{Cl}_2\text{NOP}$   $[\text{M}+\text{H}]^+$ : 314.0263; Found: 314.0266.

### **P,P-bis(4-methoxyphenyl)-N,N-dimethylphosphinic amide (3f)**

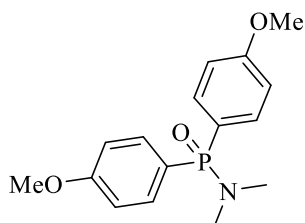

Following procedure A, which purified using mixture of ethanol/hexane (1:10) as eluent, obtained (47.0 mg, 77% yield) as a yellow oil.  $^1\text{H}$  NMR (300 MHz,  $\text{CDCl}_3$ ):  $\delta$  7.78-7.71 (m, 4H), 6.94 (d,  $J = 6.6$  Hz, 4H), 3.81 (s, 6H), 2.64 (s, 3H), 2.61 (s, 3H);  $^{13}\text{C}$  NMR (100 MHz,  $\text{CDCl}_3$ ):  $\delta$  162.3, 162.2, 134.1, 134.0, 132.9, 132.8, 124.0, 122.7, 114.2, 114.0, 113.5, 113.4, 55.3, 55.1, 37.1, 37.0;  $^{31}\text{P}$  NMR (162 MHz,  $\text{CDCl}_3$ ):  $\delta$

31.60; HRMS (ESI): Exact mass calcd for  $C_{16}H_{20}NO_3P$   $[M+H]^+$ : 306.1254; Found: 306.1259.

### **N,N-dimethyl-P,P-di-m-tolylphosphinic amide (3g)**

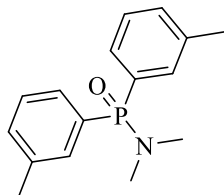

Following procedure A, which purified using mixture of ethanol/hexane (1:10) as eluent, obtained (41.5 mg, 76% yield) as a white solid; Mp 113-114 °C.  $^1H$  NMR (300 MHz,  $CDCl_3$ ):  $\delta$  7.72 (d,  $J = 12.3$  Hz, 2H), 7.62 (t,  $J = 6.9$  Hz, 2H), 7.37-7.31 (m, 4H), 2.68 (s, 3H), 2.65 (s, 3H), 2.39 (s, 6H);  $^{13}C$  NMR (100 MHz,  $CDCl_3$ ):  $\delta$  138.5, 138.4, 133.0, 132.9, 132.5, 132.3, 131.1, 129.3, 129.2, 128.5, 128.3, 37.2, 21.4;  $^{31}P$  NMR (162 MHz,  $CDCl_3$ ):  $\delta$  31.88; HRMS (ESI): Exact mass calcd for  $C_{16}H_{20}NOP$   $[M+H]^+$ : 274.1355; Found: 274.1358.

### **N,N-dimethyl-P,P-di-o-tolylphosphinic amide (3h)**

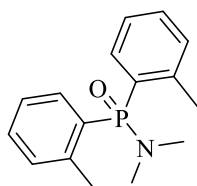

Following procedure A, which purified using mixture of ethanol/hexane (1:10) as eluent, obtained (38.8 mg, 71% yield) as a white solid; Mp 110-112 °C.  $^1H$  NMR (300 MHz, DMSO):  $\delta$  7.50-7.45 (m, 2H), 7.37-7.19 (m, 6H), 2.65 (s, 3H), 2.61 (s, 3H), 2.43 (s, 6H);  $^{13}C$  NMR (100 MHz,  $CDCl_3$ ):  $\delta$  143.1, 143.0, 132.7, 132.6, 131.9, 131.8, 131.7, 131.4, 131.3, 130.1, 125.4, 125.3, 36.9, 36.8, 21.5, 21.4;  $^{31}P$  NMR (162 MHz,  $CDCl_3$ ):  $\delta$  37.00; HRMS (ESI): Exact mass calcd for  $C_{16}H_{20}NOP$   $[M+H]^+$ : 274.1355; Found: 274.1351.

### **P,P-bis(3,5-dimethylphenyl)-N,N-dimethylphosphinic amide (3i)**

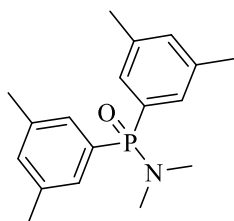

Following procedure A, which purified using mixture of ethanol/hexane (1:10) as eluent, obtained (42.2 mg, 70% yield) as a white solid; Mp 117-118 °C.  $^1H$  NMR (300

MHz, CDCl<sub>3</sub>):  $\delta$  7.47 (s, 2H), 7.43 (s, 2H), 7.08 (s, 2H), 2.65 (s, 3H), 2.61 (s, 3H), 2.31 (s, 12H); <sup>13</sup>C NMR (100 MHz, CDCl<sub>3</sub>):  $\delta$  138.2, 138.1, 133.4, 132.3, 131.0, 129.9, 37.2, 21.3; <sup>31</sup>P NMR (162 MHz, CDCl<sub>3</sub>):  $\delta$  32.34; HRMS (ESI): Exact mass calcd for [M+H]<sup>+</sup>: 302.1668; Found: 302.1662.

**N,N-dimethyl-P,P-di(naphthalen-2-yl)phosphinic amide (3j)**

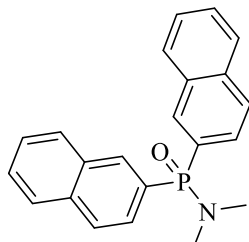

Following procedure A, which purified using mixture of ethanol/hexane (1:10) as eluent, obtained (49.7 mg, 72% yield) as a yellow oil. <sup>1</sup>H NMR (300 MHz, CDCl<sub>3</sub>):  $\delta$  8.58 (d, *J* = 13.5 Hz, 2H), 7.96-7.84 (m, 8H), 7.59-7.53 (m, 4H), 2.78 (s, 3H), 2.75 (s, 3H); <sup>13</sup>C NMR (100 MHz, CDCl<sub>3</sub>):  $\delta$  134.8, 134.1, 132.7, 131.8, 129.6, 129.0, 128.8, 128.5, 128.4, 128.1, 127.7, 127.0, 126.9, 126.8, 126.2, 37.3, 37.2, 34.6; <sup>31</sup>P NMR (162 MHz, CDCl<sub>3</sub>):  $\delta$  31.34; HRMS (ESI): Exact mass calcd for C<sub>22</sub>H<sub>20</sub>NOP [M+H]<sup>+</sup>: 346.1355; Found: 346.1354.

**N,N-dimethyl-P-phenyl-P-(p-tolyl)phosphinic amide (3k)**

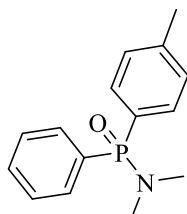

Following procedure A, which purified using mixture of ethanol/hexane (1:10) as eluent, obtained (26.4 mg, 51% yield) as a yellow oil. <sup>1</sup>H NMR (300 MHz, CDCl<sub>3</sub>):  $\delta$  7.87-7.80 (m, 2H), 7.73 (dd, *J* = 11.7 Hz, 8.1 Hz, 2H), 7.47-7.42 (m, 3H), 7.26-7.23 (m, 2H), 2.66 (s, 3H), 2.62 (s, 3H), 2.36 (s, 3H); <sup>13</sup>C NMR (100 MHz, CDCl<sub>3</sub>):  $\delta$  142.3, 142.2, 132.7, 132.4, 132.3, 132.2, 131.7, 131.6, 131.4, 129.4, 129.3, 129.0, 128.6, 128.5, 127.7, 37.1, 21.6; <sup>31</sup>P NMR (162 MHz, CDCl<sub>3</sub>):  $\delta$  31.81; HRMS (ESI): Exact mass calcd for C<sub>15</sub>H<sub>18</sub>NOP [M+H]<sup>+</sup>: 260.1199; Found: 260.1191.

**P-(4-chlorophenyl)-N,N-dimethyl-P-phenylphosphinic amide (3l)**

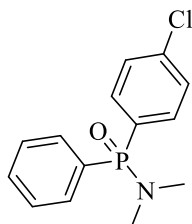

Following procedure A, which purified using mixture of ethanol/hexane (1:10) as eluent, obtained (29.6 mg, 53% yield) as a yellow oil.  $^1\text{H}$  NMR (300 MHz,  $\text{CDCl}_3$ ):  $\delta$  7.86-7.76 (m, 4H), 7.51-7.41 (m, 5H), 2.67 (s, 3H), 2.63 (s, 3H);  $^{13}\text{C}$  NMR (100 MHz,  $\text{CDCl}_3$ ):  $\delta$  138.4, 133.8, 133.7, 132.3, 132.2, 132.0, 131.1, 130.7, 129.8, 129.0, 128.9, 128.8, 128.7, 37.1;  $^{31}\text{P}$  NMR (162 MHz,  $\text{CDCl}_3$ ):  $\delta$  30.56; HRMS (ESI): Exact mass calcd for  $\text{C}_{14}\text{H}_{15}\text{ClNOP}$   $[\text{M}+\text{H}]^+$ : 280.0653; Found: 280.0652.

### N-ethyl-N-methyl-P,P-diphenylphosphinic amide (3o)

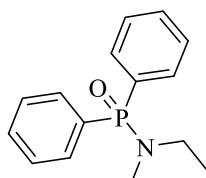

Following procedure A, which purified using mixture of ethanol/hexane (1:10) as eluent, obtained (42.0 mg, 81% yield) as a white solid; Mp 93-94 °C.  $^1\text{H}$  NMR (300 MHz,  $\text{CDCl}_3$ ):  $\delta$  7.82-7.75 (m, 4H), 7.57-7.48 (m, 6H), 2.90-2.85 (m, 2H), 2.54 (s, 3H), 1.06 (t,  $J = 6.9$  Hz, 3H);  $^{13}\text{C}$  NMR (100 MHz,  $\text{CDCl}_3$ ):  $\delta$  132.8, 132.4, 132.3, 131.7, 131.5, 128.6, 128.5, 43.9, 43.8, 33.3, 33.2, 13.6;  $^{31}\text{P}$  NMR (162 MHz,  $\text{CDCl}_3$ ):  $\delta$  31.23; HRMS (ESI): Exact mass calcd for  $\text{C}_{15}\text{H}_{18}\text{NOP}$   $[\text{M}+\text{Na}]^+$ : 282.1018; Found: 282.1017.

### diphenyl(pyrrolidin-1-yl)phosphine oxide (3p)

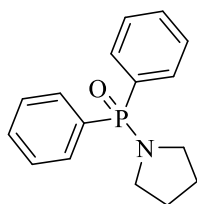

Following procedure A, which purified using mixture of ethanol/hexane (1:10) as eluent, obtained (22.8 mg, 42% yield) as a colorless oil.  $^1\text{H}$  NMR (300 MHz,  $\text{CDCl}_3$ ):  $\delta$  7.91-7.84 (m, 4H), 7.44-7.41 (m, 6H), 3.11-3.09 (m, 4H), 1.88-1.83 (m, 4H);  $^{13}\text{C}$  NMR (100 MHz,  $\text{CDCl}_3$ ):  $\delta$  131.2, 131.1, 130.2, 128.0, 127.9, 44.3, 24.3;  $^{31}\text{P}$  NMR (162 MHz,  $\text{CDCl}_3$ ):  $\delta$  21.43; HRMS (ESI): Exact mass calcd for  $\text{C}_{16}\text{H}_{18}\text{NOP}$   $[\text{M}+\text{H}]^+$ : 272.1199; Found: 272.1198.



### diphenyl(piperidin-1-yl)phosphine oxide (3q)

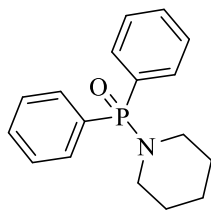

Following procedure A, which purified using mixture of ethanol/hexane (1:10) as eluent, obtained (34.8 mg, 61% yield) as a yellow solid; Mp 103-104 °C. <sup>1</sup>H NMR (300 MHz, CDCl<sub>3</sub>): δ 7.92-7.85 (m, 4H), 7.50-7.42 (m, 6H), 3.06-3.00 (m, 4H), 1.61-1.58 (m, 6H); <sup>13</sup>C NMR (100 MHz, CDCl<sub>3</sub>): δ 132.7, 132.4, 132.3, 131.4, 128.6, 128.5, 45.8, 26.3, 26.2, 24.6; <sup>31</sup>P NMR (162 MHz, CDCl<sub>3</sub>): δ 29.06; HRMS (ESI): Exact mass calcd for C<sub>17</sub>H<sub>20</sub>NOP [M+H]<sup>+</sup>: 286.1355; Found: 286.1356.

### morpholinodiphenylphosphine oxide (3r)

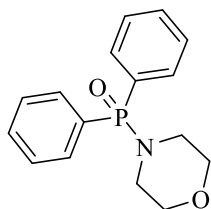

Following procedure A, which purified using mixture of ethanol/hexane (1:10) as eluent, obtained (31.0 mg, 54% yield) as a yellow oil. <sup>1</sup>H NMR (300 MHz, CDCl<sub>3</sub>): δ 7.92-7.85 (m, 4H), 7.53-7.44 (m, 6H), 3.72 (t, *J* = 4.2 Hz, 4H), 3.11-3.05 (m, 4H); <sup>13</sup>C NMR (100 MHz, CDCl<sub>3</sub>): δ 132.5, 132.4, 132.1, 132.0, 131.4, 130.2, 128.8, 128.7, 67.3, 67.2, 45.0; <sup>31</sup>P NMR (162 MHz, CDCl<sub>3</sub>): δ 29.24; HRMS (ESI): Exact mass calcd for C<sub>16</sub>H<sub>18</sub>NO<sub>2</sub>P [M+H]<sup>+</sup>: 288.1148; Found: 288.1149.

### N,N-dimethyl-P,P-diphenylphosphinothioic amide (3s)

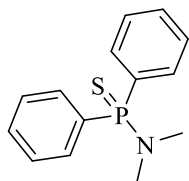

Following procedure A, which purified using mixture of ethanol/hexane (1:10) as eluent, obtained (40.8 mg, 78% yield) as a white solid; Mp 78-79 °C. <sup>1</sup>H NMR (300 MHz, DMSO): δ 8.04-7.97 (m, 4H), 7.56-7.53 (m, 6H), 2.42 (s, 3H), 2.38 (s, 3H); <sup>13</sup>C NMR (100 MHz, CDCl<sub>3</sub>): δ 133.3, 132.3, 132.1, 132.0, 131.7, 131.6, 128.5, 128.4, 37.5; <sup>31</sup>P NMR (162 MHz, CDCl<sub>3</sub>): δ 71.13; HRMS (ESI): Exact mass calcd for

C<sub>14</sub>H<sub>16</sub>NPS [M+NH<sub>4</sub>]<sup>+</sup>: 279.1079; Found: 279.1079.

### diphenyl(pyrrolidin-1-yl)phosphine sulfide (3t)

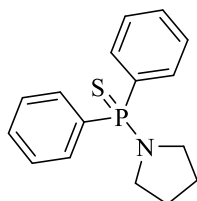

Following procedure A, which purified using mixture of ethanol/hexane (1:10) as eluent, obtained (21.3 mg, 37% yield) as a yellow solid; Mp 92-93 °C. <sup>1</sup>H NMR (300 MHz, CDCl<sub>3</sub>): δ 8.12-8.04 (m, 4H), 7.49-7.44 (m, 6H), 3.02 (t, *J* = 2.7 Hz, 4H), 1.92-1.88 (m, 4H); <sup>13</sup>C NMR (100 MHz, CDCl<sub>3</sub>): δ 134.3, 133.3, 132.1, 132.0, 131.5, 128.4, 128.3, 47.3, 47.2, 26.4, 26.3; <sup>31</sup>P NMR (162 MHz, CDCl<sub>3</sub>): δ 65.08; HRMS (ESI): Exact mass calcd for C<sub>16</sub>H<sub>18</sub>NPS [M+H]<sup>+</sup>: 288.0970; Found: 288.0971.

### diphenyl(piperidin-1-yl)phosphine sulfide (3u)

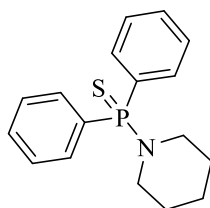

Following procedure A, which purified using mixture of ethanol/hexane (1:10) as eluent, obtained (30.7 mg, 51% yield) as a white solid; Mp 77-79 °C. <sup>1</sup>H NMR (300 MHz, CDCl<sub>3</sub>): δ 8.12-8.04 (m, 4H), 7.49-7.44 (m, 6H), 2.84 (d, *J* = 3.0 Hz, 4H), 1.63 (s, 6H); <sup>13</sup>C NMR (100 MHz, CDCl<sub>3</sub>): δ 133.4, 132.4, 132.0, 131.9, 131.5, 128.5, 128.4, 46.0, 25.9, 25.8, 24.3; <sup>31</sup>P NMR (162 MHz, CDCl<sub>3</sub>): δ 67.56; HRMS (ESI): Exact mass calcd for C<sub>17</sub>H<sub>20</sub>NPS [M+H]<sup>+</sup>: 302.1127; Found: 302.1121.

### morpholinodiphenylphosphine sulfide (3v)

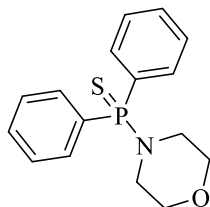

Following procedure A, which purified using mixture of ethanol/hexane (1:10) as eluent, obtained (27.9 mg, 46% yield) as a white solid; Mp 90-91 °C. <sup>1</sup>H NMR (300 MHz, CDCl<sub>3</sub>): δ 8.12-8.04 (m, 4H), 7.52-7.47 (m, 6H), 3.77 (t, *J* = 3.9 Hz, 4H), 2.92-2.87 (m, 4H); <sup>13</sup>C NMR (100 MHz, CDCl<sub>3</sub>): δ 132.3, 132.2, 132.1, 131.9, 131.3,

128.7, 128.6, 66.8, 66.7, 45.1;  $^{31}\text{P}$  NMR (162 MHz,  $\text{CDCl}_3$ ):  $\delta$  67.60; HRMS (ESI): Exact mass calcd for  $\text{C}_{16}\text{H}_{18}\text{NOPS}$   $[\text{M}+\text{H}]^+$ : 304.0847; Found: 304.0851.

### **N,N-dimethyl-P,P-diphenylphosphinoselenoic amide (3w)**

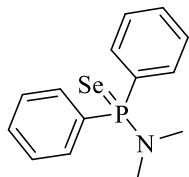

Following procedure A, which purified using mixture of ethanol/hexane (1:10) as eluent, obtained (41.3 mg, 67% yield) as a pink solid; Mp 78-79 °C.  $^1\text{H}$  NMR (300 MHz, DMSO):  $\delta$  8.08-8.01 (m, 4H), 7.57-7.54 (m, 6H), 2.36 (s, 3H), 2.31 (s, 3H);  $^{13}\text{C}$  NMR (100 MHz,  $\text{CDCl}_3$ ):  $\delta$  132.6, 132.4, 132.3, 131.8, 131.7, 128.5, 128.4, 38.1;  $^{31}\text{P}$  NMR (162 MHz,  $\text{CDCl}_3$ ):  $\delta$  72.82; HRMS (ESI): Exact mass calcd for  $\text{C}_{14}\text{H}_{16}\text{NPSe}$   $[\text{M}+\text{H}]^+$ : 310.0258; Found: 310.0259.

### **N-ethyl-N-methyl-P,P-diphenylphosphinoselenoic amide (3x)**

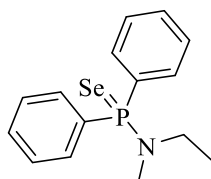

Following procedure A, which purified using mixture of ethanol/hexane (1:10) as eluent, obtained (38.0 mg, 59% yield) as a white solid; Mp 86-87 °C.  $^1\text{H}$  NMR (300 MHz,  $\text{CDCl}_3$ ):  $\delta$  8.13-8.06 (m, 4H), 7.49-7.42 (m, 6H), 2.87-2.77 (m, 2H), 2.48 (d,  $J = 15.3$  Hz, 3H), 1.17 (t,  $J = 7.2$  Hz, 3H);  $^{13}\text{C}$  NMR (100 MHz,  $\text{CDCl}_3$ ):  $\delta$  133.1, 132.3, 132.2, 132.1, 131.7, 128.4, 128.3, 45.0, 34.1, 12.9, 12.8;  $^{31}\text{P}$  NMR (162 MHz,  $\text{CDCl}_3$ ):  $\delta$  71.17; HRMS (ESI): Exact mass calcd for  $\text{C}_{15}\text{H}_{18}\text{NPSe}$   $[\text{M}+\text{H}]^+$ : 324.0415; Found: 324.0411.

### **diphenyl(pyrrolidin-1-yl)phosphine selenide (3y)**

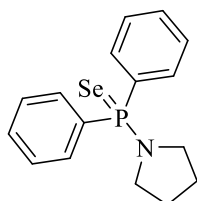

Following procedure A, which purified using mixture of ethanol/hexane (1:10) as eluent, obtained (27.4 mg, 41% yield) as a yellow solid; Mp 109-110 °C.  $^1\text{H}$  NMR (300 MHz, DMSO):  $\delta$  8.07-8.00 (m, 4H), 7.56-7.52 (m, 6H), 2.87-2.79 (m, 4H),

1.85-1.81 (m, 4H);  $^{13}\text{C}$  NMR (100 MHz,  $\text{CDCl}_3$ ):  $\delta$  133.6, 132.7, 132.3, 132.2, 131.7, 128.4, 128.3, 47.9, 26.2, 26.1;  $^{31}\text{P}$  NMR (162 MHz,  $\text{CDCl}_3$ ):  $\delta$  66.42; HRMS (ESI): Exact mass calcd for  $\text{C}_{16}\text{H}_{18}\text{NPSe}$   $[\text{M}+\text{Na}]^+$ : 358.0234; Found: 358.0235.

### diphenyl(piperidin-1-yl)phosphine selenide (3z)

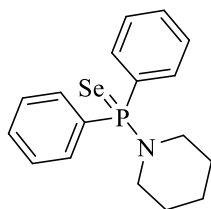

Following procedure A, which purified using mixture of ethanol/hexane (1:10) as eluent, obtained (30.7 mg, 44% yield) as a yellow solid; Mp 81-82 °C.  $^1\text{H}$  NMR (300 MHz,  $\text{CDCl}_3$ ):  $\delta$  8.14-8.07 (m, 4H), 7.48-7.42 (m, 6H), 2.77 (t,  $J = 3.9$  Hz, 4H), 1.64 (s, 6H);  $^{13}\text{C}$  NMR (100 MHz,  $\text{CDCl}_3$ ):  $\delta$  132.6, 132.3, 132.2, 132.1, 131.7, 128.5, 128.4, 128.3, 46.6, 25.7, 25.6, 24.2;  $^{31}\text{P}$  NMR (162 MHz,  $\text{CDCl}_3$ ):  $\delta$  68.22; HRMS (ESI): Exact mass calcd for  $\text{C}_{17}\text{H}_{20}\text{NPSe}$   $[\text{M}+\text{H}]^+$ : 350.0571; Found: 350.0570.

### morpholinodiphenylphosphine selenide (3aa)

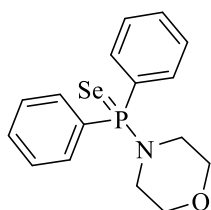

Following procedure A, which purified using mixture of ethanol/hexane (1:10) as eluent, obtained (35.0 mg, 50% yield) as a brown solid; Mp 113-114 °C.  $^1\text{H}$  NMR (300 MHz,  $\text{CDCl}_3$ ):  $\delta$  8.14-8.07 (m, 4H), 7.52-7.44 (m, 6H), 3.79 (t,  $J = 4.2$  Hz, 4H), 2.86-2.81 (m, 4H);  $^{13}\text{C}$  NMR (100 MHz,  $\text{CDCl}_3$ ):  $\delta$  132.5, 132.4, 132.1, 131.6, 130.6, 128.7, 128.5, 66.6, 66.4, 45.6;  $^{31}\text{P}$  NMR (162 MHz,  $\text{CDCl}_3$ ):  $\delta$  68.61; HRMS (ESI): Exact mass calcd for  $\text{C}_{16}\text{H}_{18}\text{NOPSe}$   $[\text{M}+\text{H}]^+$ : 352.0291; Found: 352.0296.

### tert-butyl diphenylphosphinate (4a)

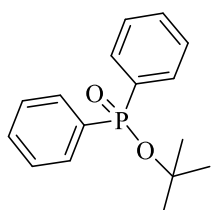

Following procedure B, which purified using mixture of EtOAc/hexane (1:2) as eluent,

obtained (44.4 mg, 81% yield) as a white solid; Mp 102-103 °C. <sup>1</sup>H NMR (300 MHz, CDCl<sub>3</sub>): δ 7.82-7.75 (m, 4H), 7.43-7.35 (m, 6H), 1.49 (s, 9H); <sup>13</sup>C NMR (100 MHz, CDCl<sub>3</sub>): δ 135.4, 134.0, 131.5, 131.4, 131.3, 128.3, 128.2, 83.7, 83.6, 31.0, 30.9; <sup>31</sup>P NMR (162 MHz, CDCl<sub>3</sub>): δ 25.77; HRMS (ESI): Exact mass calcd for C<sub>16</sub>H<sub>19</sub>O<sub>2</sub>P [M+Na]<sup>+</sup>: 297.1015; Found: 297.1016.

#### **tert-butyl di-p-tolylphosphinate (4b)**

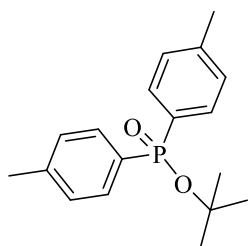

Following procedure B, which purified using mixture of EtOAc/hexane (1:2) as eluent, obtained (52.0 mg, 86% yield) as a white solid; Mp 118-119 °C. <sup>1</sup>H NMR (300 MHz, CDCl<sub>3</sub>): δ 7.70-7.63 (m, 4H), 7.21-7.17 (m, 4H), 2.34 (s, 6H), 1.49 (s, 9H). <sup>13</sup>C NMR (100 MHz, CDCl<sub>3</sub>): δ 141.8, 132.5, 131.4, 131.3, 131.1, 129.1, 128.9, 83.2, 31.0, 31.0, 30.9, 21.6; <sup>31</sup>P NMR (162 MHz, CDCl<sub>3</sub>): 26.71; HRMS(ESI): Exact mass calcd for C<sub>18</sub>H<sub>23</sub>O<sub>2</sub>P [M+Na]<sup>+</sup>: 325.1328; Found: 325.1321.

#### **tert-butyl bis(4-(tert-butyl)phenyl)phosphinate (4c)**

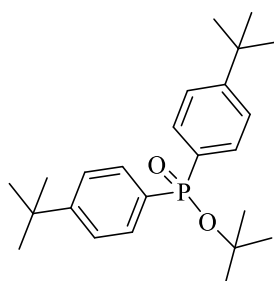

Following procedure B, which purified using mixture of EtOAc/hexane (1:2) as eluent, obtained (63.4 mg, 82% yield) as a white solid; Mp: 144-146 °C. <sup>1</sup>H NMR (300 MHz, CDCl<sub>3</sub>): δ 7.76-7.70 (m, 4H), 7.45-7.42 (m, 4H), 1.52 (s, 9H), 1.32 (s, 18H); <sup>13</sup>C NMR (100 MHz, CDCl<sub>3</sub>): δ 154.7, 131.2, 131.1, 131.0, 125.3, 125.2, 83.2, 83.1, 34.9, 31.2, 31.0; <sup>31</sup>P NMR (162 MHz, CDCl<sub>3</sub>): δ 26.66; HRMS (ESI): Exact mass calcd for C<sub>24</sub>H<sub>35</sub>O<sub>2</sub>P [M+Na]<sup>+</sup>: 409.2267; Found: 409.2266.

#### **tert-butyl bis(4-fluorophenyl)phosphinate (4d)**

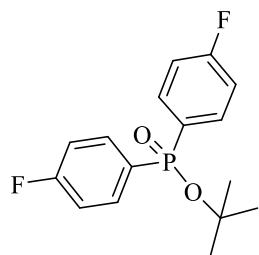

Following procedure B, which purified using mixture of EtOAc/hexane (1:2) as eluent, obtained (47.2 mg, 76% yield) as a white solid; Mp 69-71 °C.  $^1\text{H}$  NMR (300 MHz,  $\text{CDCl}_3$ ):  $\delta$  7.81-7.72 (m, 4H), 7.12-7.05 (m, 4H), 1.49 (s, 9H);  $^{13}\text{C}$  NMR (100 MHz,  $\text{CDCl}_3$ ):  $\delta$  164.9 (d,  $J_{\text{CF}} = 251.3$  Hz), 133.7 (dd,  $^3J_{\text{CF}} = 11.5$  Hz,  $^3J_{\text{CF}} = 8.7$  Hz), 131.3, 131.2, 129.9, 129.8, 115.7 (dd,  $^2J_{\text{CF}} = 21.3$  Hz,  $^2J_{\text{CF}} = 14.3$  Hz), 84.3, 84.2, 30.9;  $^{31}\text{P}$  NMR (162 MHz,  $\text{CDCl}_3$ ):  $\delta$  23.98;  $^{19}\text{F}$  NMR (376 MHz  $\text{CDCl}_3$ ):  $\delta$  -111.11; HRMS (ESI): Exact mass calcd for  $\text{C}_{16}\text{H}_{17}\text{F}_2\text{O}_2\text{P}$   $[\text{M}+\text{Na}]^+$  :333.0934; Found: 333.0931.

#### tert-butyl bis(4-chlorophenyl)phosphinate (4e)

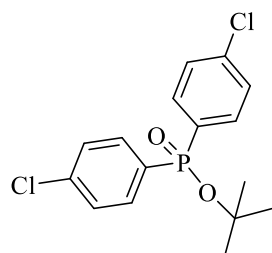

Following procedure B, which purified using mixture of EtOAc/hexane (1:2) as eluent, obtained (47.4 mg, 69% yield) as a white solid; Mp 79-80 °C.  $^1\text{H}$  NMR (300 MHz,  $\text{CDCl}_3$ ):  $\delta$  7.74-7.67 (m, 4H), 7.43-7.39 (m, 4H), 1.52 (s, 9H);  $^{13}\text{C}$  NMR (100 MHz,  $\text{CDCl}_3$ ):  $\delta$  138.3, 133.5, 132.7, 132.6, 132.1, 128.9, 128.7, 84.7, 84.6, 31.0, 30.9;  $^{31}\text{P}$  NMR (162 MHz,  $\text{CDCl}_3$ ):  $\delta$  23.85; HRMS (ESI): Exact mass calcd for  $\text{C}_{16}\text{H}_{17}\text{Cl}_2\text{O}_2\text{P}$   $[\text{M}+\text{Na}]^+$ :365.0235; Found:365.0234.

#### tert-butyl bis(4-methoxyphenyl)phosphinate (4f)

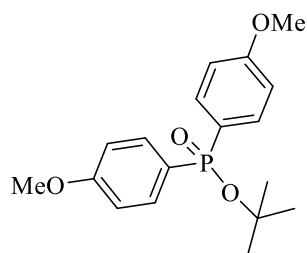

Following procedure B, which purified using mixture of EtOAc/hexane (1:2) as eluent, obtained (55.5 mg, 83% yield) as a white solid; White solid.  $^1\text{H}$  NMR (300 MHz,

CDCl<sub>3</sub>):  $\delta$  7.64-7.57 (m, 4H), 7.04-7.00 (m, 4H), 3.79 (s, 6H), 1.40 (s, 9H); <sup>13</sup>C NMR (100 MHz, CDCl<sub>3</sub>):  $\delta$  162.0, 133.2, 133.1, 127.2, 125.8, 113.8, 113.7, 83.1, 83.0, 55.3, 31.0, 30.9; <sup>31</sup>P NMR (162 MHz, CDCl<sub>3</sub>):  $\delta$  26.59; HRMS (ESI): Exact mass calcd for C<sub>18</sub>H<sub>23</sub>O<sub>4</sub>P [M+H]<sup>+</sup>: 335.1407; Found: 335.1404.

#### tert-butyl di-m-tolylphosphinate (4g)

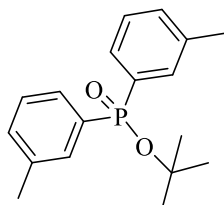

Following procedure B, which purified using mixture of EtOAc/hexane (1:2) as eluent, obtained (46.0 mg, 76% yield) as a white solid; Mp 70-71 °C. <sup>1</sup>H NMR (300 MHz, CDCl<sub>3</sub>):  $\delta$  7.64-7.54 (m, 4H), 7.32-7.25 (m, 4H), 2.36 (s, 6H), 1.51 (s, 9H); <sup>13</sup>C NMR (100 MHz, CDCl<sub>3</sub>):  $\delta$  138.1, 138.0, 135.3, 134.0, 132.3, 132.2, 131.8, 131.7, 128.5, 128.4, 128.2, 128.1, 83.5, 83.4, 31.0, 30.9, 21.4; <sup>31</sup>P NMR (162 MHz, CDCl<sub>3</sub>):  $\delta$  26.49; HRMS (ESI): Exact mass calcd for C<sub>18</sub>H<sub>23</sub>O<sub>2</sub>P [M+Na]<sup>+</sup>: 325.1328; Found: 325.1322.

#### tert-butyl (3,4-dimethylphenyl)(3,5-dimethylphenyl)phosphinate (4h)

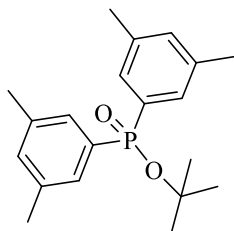

Following procedure B, which purified using mixture of EtOAc/hexane (1:2) as eluent, obtained (39.6 mg, 60% yield) as a white solid; Mp 86-87 °C. <sup>1</sup>H NMR (500 MHz, CDCl<sub>3</sub>):  $\delta$  7.43 (s, 2H), 7.39 (s, 2H), 7.09 (s, 2H), 2.33 (s, 12H), 1.52 (s, 9H); <sup>13</sup>C NMR (125 MHz, CDCl<sub>3</sub>):  $\delta$  137.8, 137.8, 135.1, 134.0, 133.2, 133.1, 128.9, 128.8, 83.3, 83.2, 31.0, 21.3; <sup>31</sup>P NMR (202 MHz, CDCl<sub>3</sub>):  $\delta$  27.18; HRMS (ESI): Exact mass calcd for C<sub>20</sub>H<sub>27</sub>O<sub>2</sub>P [M+Na]<sup>+</sup>: 353.1641; Found: 353.1646.

#### tert-butyl di-o-tolylphosphinate(4i)

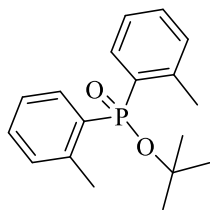

Following procedure B, which purified using mixture of EtOAc/hexane (1:2) as eluent, obtained (40.5 mg, 67% yield) as a white solid; Mp 82-84 °C.  $^1\text{H}$  NMR (300 MHz,  $\text{CDCl}_3$ ):  $\delta$  8.03-7.95 (m, 2H), 7.40-7.34 (m, 2H), 7.30-7.27 (m, 2H), 7.16-7.12 (m, 2H), 2.32 (s, 6H), 1.51 (s, 9H);  $^{13}\text{C}$  NMR (100 MHz,  $\text{CDCl}_3$ ):  $\delta$  141.2, 141.1, 133.5, 133.4, 133.3, 132.1, 131.7, 131.3, 131.2, 125.4, 125.3, 83.9, 83.8, 30.9, 30.8, 21.2;  $^{31}\text{P}$  NMR (162 MHz,  $\text{CDCl}_3$ ):  $\delta$  25.72; HRMS (ESI): Exact mass calcd for  $\text{C}_{18}\text{H}_{23}\text{O}_2\text{P}$   $[\text{M}+\text{Na}]^+$ : 325.1328; Found: 325.1323.

#### tert-butyl di(naphthalen-1-yl)phosphinate (4j)

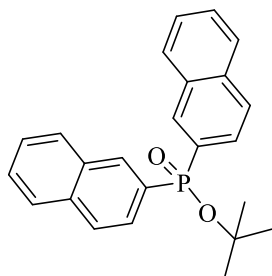

Following procedure B, which purified using mixture of EtOAc/hexane (1:2) as eluent, obtained (57.7 mg, 77% yield) as a white solid; Mp 144-145 °C.  $^1\text{H}$  NMR(300 MHz, DMSO):  $\delta$  8.44 (d,  $J = 14.1$  Hz, 2H), 8.10 (d,  $J = 7.2$  Hz, 2H), 8.04-7.95 (m, 4H), 7.83-7.76 (m, 2H), 7.64-7.59 (m, 4H), 1.50 (s, 9H);  $^{13}\text{C}$  NMR (100 MHz,  $\text{CDCl}_3$ ):  $\delta$  134.7, 134.6, 133.0, 132.9, 132.6, 132.5, 132.4, 131.1, 129.0, 128.2, 128.0, 127.9, 127.7, 126.7, 126.6, 126.5, 84.0, 83.9, 31.1, 31.0;  $^{31}\text{P}$  NMR (162 MHz,  $\text{CDCl}_3$ ):  $\delta$  25.96; HRMS (EI): Exact mass calcd for  $\text{C}_{24}\text{H}_{23}\text{O}_2\text{P}$   $[\text{M}+\text{Na}]^+$ : 397.1328; Found: 397.1320.

#### tert-butyl phenyl(p-tolyl)phosphinate (4k)

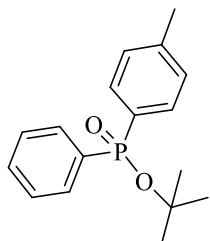

Following procedure B, which purified using mixture of EtOAc/hexane (1:2) as eluent, obtained (47.3 mg, 82% yield) as a yellow solid; Mp 70-72 °C.  $^1\text{H}$  NMR (300 MHz,



CDCl<sub>3</sub>):  $\delta$  7.82-7.66 (m, 4H), 7.47-7.40 (m, 3H), 7.24-7.22 (m, 2H), 2.38 (s, 3H), 1.52 (s, 9H); <sup>13</sup>C NMR (100 MHz, CDCl<sub>3</sub>):  $\delta$  141.9, 135.7, 134.3, 132.2, 131.5, 131.4, 131.3, 131.2, 130.8, 129.1, 129.0, 128.3, 128.2, 83.5, 83.4, 31.0, 30.9, 21.6; <sup>31</sup>P NMR (162 MHz, CDCl<sub>3</sub>):  $\delta$  26.26; HRMS (ESI): Exact mass calcd for C<sub>17</sub>H<sub>21</sub>O<sub>2</sub>P [M+Na]<sup>+</sup>: 311.1171; Found: 311.1171.

**tert-butyl (4-chlorophenyl)(phenyl)phosphinate (4l)**

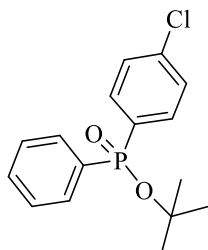

Following procedure B, which purified using mixture of EtOAc/hexane (1:2) as eluent, obtained (45.1 mg, 73% yield) as a white solid; Mp 117-119 °C. <sup>1</sup>H NMR (300 MHz, CDCl<sub>3</sub>):  $\delta$  7.79-7.67 (m, 4H), 7.45-7.34 (m, 5H), 1.49 (s, 9H); <sup>13</sup>C NMR (100 MHz, CDCl<sub>3</sub>):  $\delta$  138.1, 138.0, 134.8, 133.9, 133.4, 132.8, 132.7, 132.6, 131.8, 131.7, 131.3, 131.2, 128.7, 128.6, 128.5, 128.4, 84.2, 84.1, 30.9; <sup>31</sup>P NMR (162 MHz, CDCl<sub>3</sub>):  $\delta$  24.84; HRMS (ESI): Exact mass calcd for C<sub>16</sub>H<sub>18</sub>ClO<sub>2</sub>P [M+H]<sup>+</sup>:309.0987; Found: 309.0989.

**tert-butyl methyl(phenyl)phosphinate (4m)**

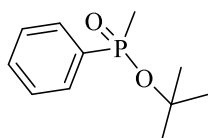

Following procedure B, which purified using mixture of EtOAc/hexane (1:2) as eluent, obtained (19.9 mg, 47% yield) as a colorless oil. <sup>1</sup>H NMR (300 MHz, CDCl<sub>3</sub>):  $\delta$  7.78-7.71 (m, 2H), 7.57-7.51 (m, 3H), 1.56 (d, *J* = 14.4 Hz, 3H), 1.35 (s, 9H); <sup>13</sup>C NMR (100 MHz, CDCl<sub>3</sub>):  $\delta$  135.8, 134.5, 131.6, 130.9, 130.8, 128.4, 128.3, 82.7, 30.8, 19.1, 18.1; <sup>31</sup>P NMR (162 MHz, CDCl<sub>3</sub>):  $\delta$  37.15; HRMS (ESI): Exact mass calcd for C<sub>11</sub>H<sub>17</sub>O<sub>2</sub>P [M+H]<sup>+</sup>:213.0977; Found: 213.0972.

**tert-pentyl diphenylphosphinate (4o)**

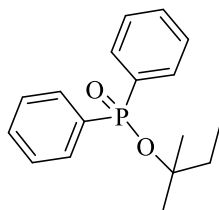

Following procedure B, which purified using mixture of EtOAc/hexane (1:2) as eluent, obtained (34.6 mg, 60% yield) as a white solid; Mp 68-69 °C.  $^1\text{H}$  NMR (300 MHz,  $\text{CDCl}_3$ ):  $\delta$  7.83-7.76 (m, 4H), 7.49-7.37 (m, 6H), 1.81 (d,  $J = 7.5$  Hz, 2H), 1.46 (s, 6H), 0.99 (t,  $J = 7.5$  Hz, 3H);  $^{13}\text{C}$  NMR (100 MHz,  $\text{CDCl}_3$ ):  $\delta$  135.5, 134.2, 131.5, 131.4, 131.3, 128.3, 128.2, 86.4, 36.6, 28.1, 8.8;  $^{31}\text{P}$  NMR (162 MHz,  $\text{CDCl}_3$ ):  $\delta$  25.49; HRMS (ESI): Exact mass calcd for  $\text{C}_{17}\text{H}_{21}\text{O}_2\text{P}$  [ $\text{M}+\text{Na}$ ] $^+$ : 311.1171; Found: 311.1171.

### 3. Mechanistic studies

#### 3.1 The radical-trapping experiment

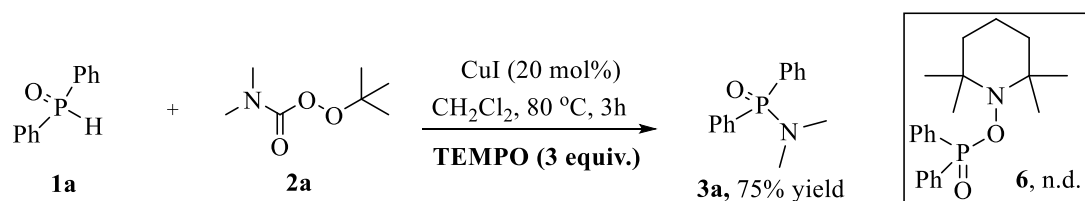

A 15 mL schlenk tube was charged with a mixture of **1a** (0.2 mmol), **2a** (0.6 mmol), TEMPO (0.6 mmol), catalyst (0.04 mmol) in DCM (1.0 mL) and was stirred at 80 °C for 3 h. After the reaction was complete (as determined by TLC analysis), the reaction was cooled to room temperature and EtOAc (20 mL) was added to the solution and washed with brine, dried over  $\text{Na}_2\text{SO}_4$ , concentrated under reduced pressure. The crude product was purified by column chromatography on silica gel (ethanol/hexane = 1:10) to afford the product **3a** in 75% yield.

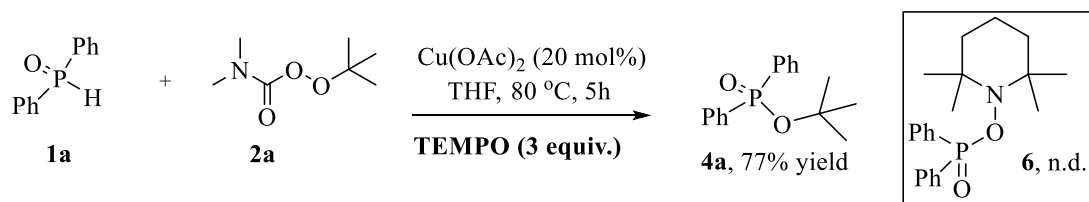

A 15 mL schlenk tube was charged with a mixture of **1a** (0.2 mmol), **2a** (0.6 mmol), TEMPO (0.6 mmol), catalyst (0.04 mmol) in THF (1.0 mL) and was stirred at 80 °C

for 5 h. After the reaction was complete (as determined by TLC analysis), the reaction was cooled to room temperature and EtOAc (20 mL) was added to the solution and washed with brine, dried over Na<sub>2</sub>SO<sub>4</sub>, concentrated under reduced pressure. The crude product was purified by column chromatography on silica gel (EtOAc/hexane = 1:2) to afford the targeted products **4a** in 77% yield.

### 3.2 Exploring possible reaction pathway

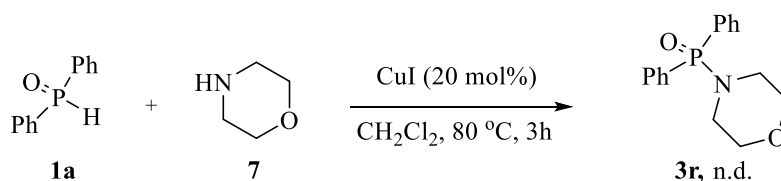

A 15 mL schlenk tube was charged with a mixture of **1a** (0.2 mmol), **7** (0.6 mmol), catalyst (0.04 mmol) in DCM (1.0 mL) and was stirred at 80 °C for 3 h. Then the reaction was monitored by TLC and the targeted product **3r** was not detected.

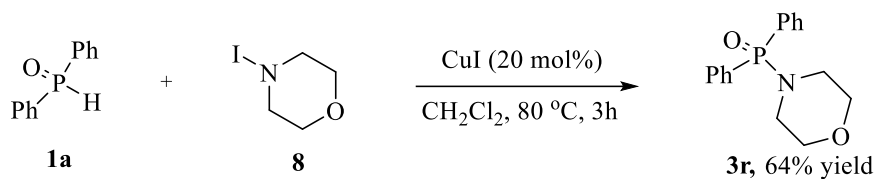

A 15 mL schlenk tube was charged with a mixture of **1a** (0.2 mmol), **8** (0.6 mmol), catalyst (0.04 mmol) in DCM (1.0 mL) and was stirred at 80 °C for 3 h. After the reaction was complete (as determined by TLC analysis), the reaction was cooled to room temperature and EtOAc (20 mL) was added to the solution and washed with brine, dried over Na<sub>2</sub>SO<sub>4</sub>, concentrated under reduced pressure. The crude product was purified by column chromatography on silica gel (ethanol/hexane = 1:10) to afford the targeted products **3r** in 64% yield.

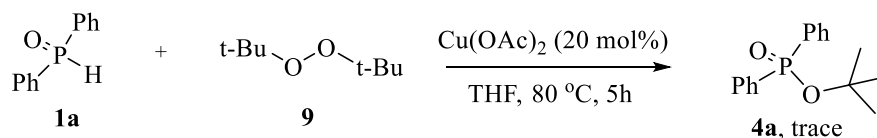

A 15 mL schlenk tube was charged with a mixture of oxidant **1a** (0.2 mmol), **9** (0.6 mmol), catalyst (0.04 mmol) in THF (1.0 mL) and was stirred at 80 °C for 5 h. Then the reaction was monitored by TLC and only trace of **4a** was detected.

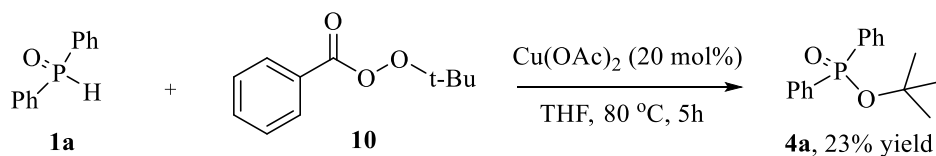

A 15 mL schlenk tube was charged with a mixture of oxidant **1a** (0.2 mmol), **10** (0.6 mmol), catalyst (0.04 mmol) in THF (1.0 mL) and was stirred at 80 °C for 5 h. After the reaction was complete (as determined by TLC analysis), the reaction was cooled to room temperature and EtOAc (20 mL) was added to the solution and washed with brine, dried over Na<sub>2</sub>SO<sub>4</sub>, concentrated under reduced pressure. The crude product was purified by column chromatography on silica gel (EtOAc/hexane = 1:2) to afford the product **4a** in 23% yield.

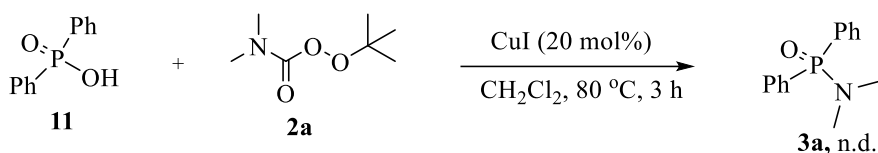

A 15 mL schlenk tube was charged with a mixture of **11** (0.2 mmol), **2a** (0.6 mmol), catalyst (0.04 mmol) in DCM (1.0 mL) and was stirred at 80 °C for 3 h. Then the reaction was monitored by TLC and the targeted product **3a** was not detected.

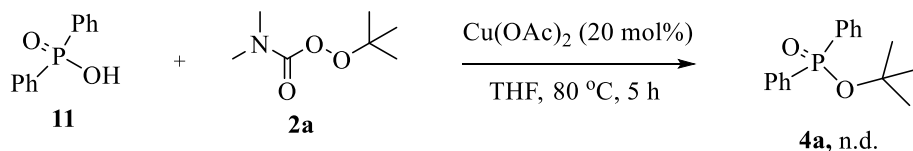

A 15 mL schlenk tube was charged with a mixture of oxidant **11** (0.2 mmol), **2a** (0.6 mmol), catalyst (0.04 mmol) in THF (1.0 mL) and was stirred at 80 °C for 5 h. Then the reaction was monitored by TLC and only trace of **4a** was detected.

## 4. References

- (a) Zhu, R.; Pan, C.; Gu, Z. *Org. Lett.* **2015**, *17*, 5862-5865; (b) Wang, Y.; Qian, P.; Su, J.-H.; Li, Y.; Bi, M.; Zha, Z.; Wang, Z. *Green Chem.* **2017**, *19*, 4769-4773; (c) Dong, X.; Wang, R.; Jin, W.; Liu, C. *Org. Lett.* **2020**, *22*, 3062-3066; (d) Tan, C.; Liu, X. Y.; Jia, H. X.; Zhao, X. W.; Chen, J.; Wang, Z. Y.; Tan, J. J. *Chem.-Eur. J.* **2020**, *26*, 881-887; (e) Wu, Y.; Chen, K.; Ge, X.; Ma, P.; Xu, Z.; Lu, H.; Li, G. *Org. Lett.* **2020**, *22*, 6143-6149.

## 5. Copies of $^1\text{H}$ NMR, $^{13}\text{C}$ NMR and $^{31}\text{P}$ NMR Spectra

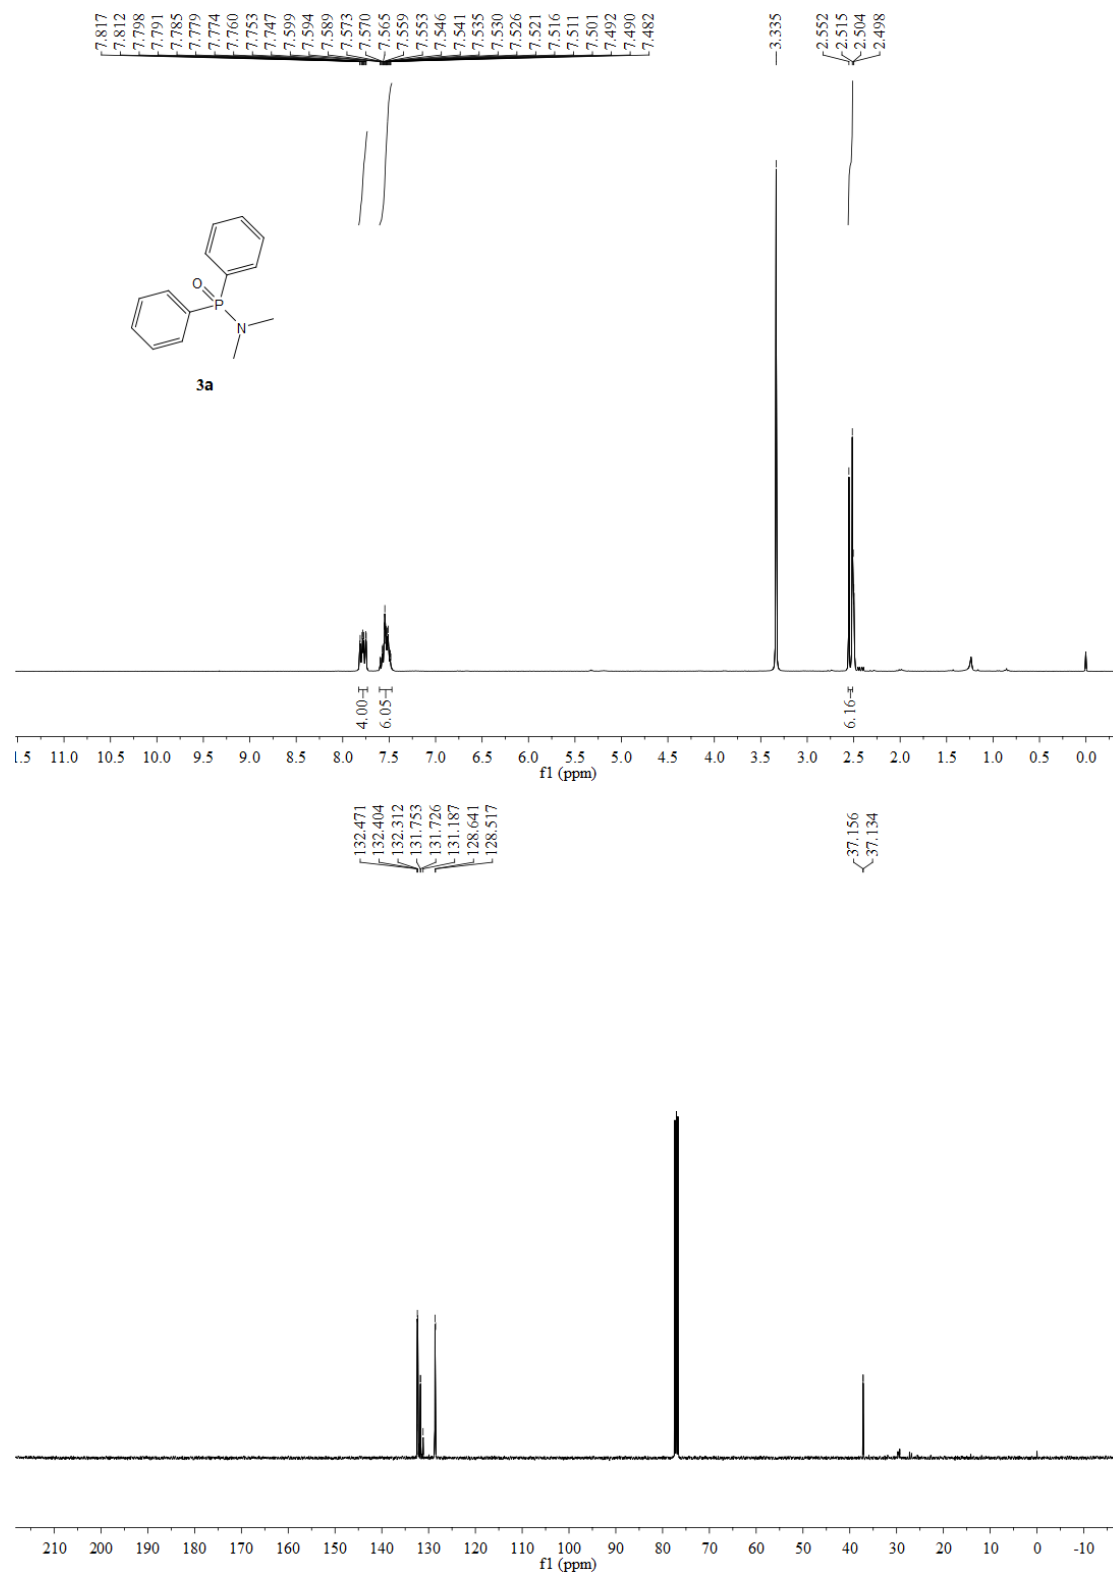

--31.403

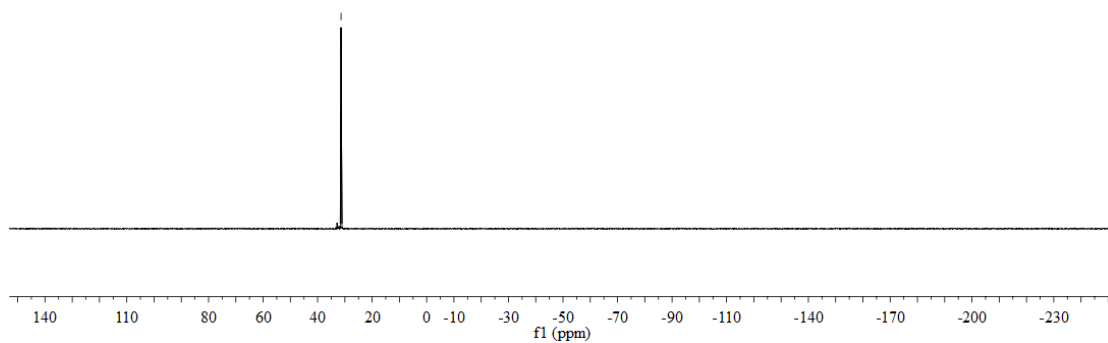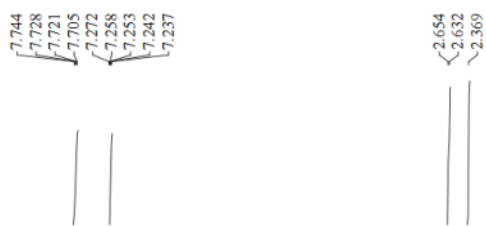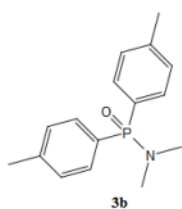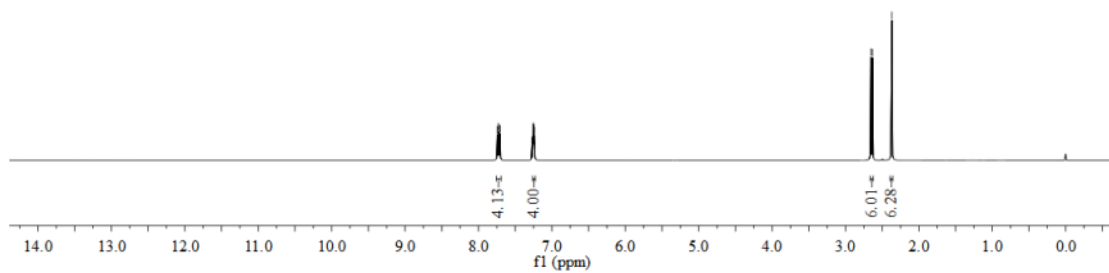

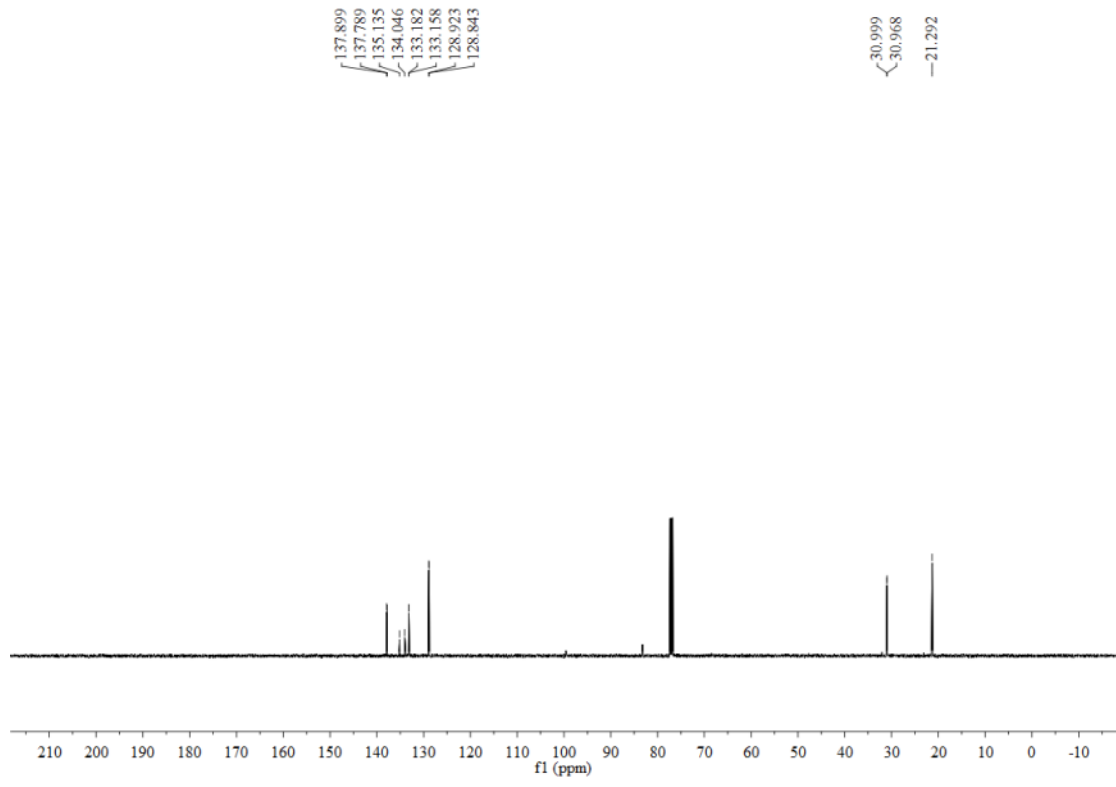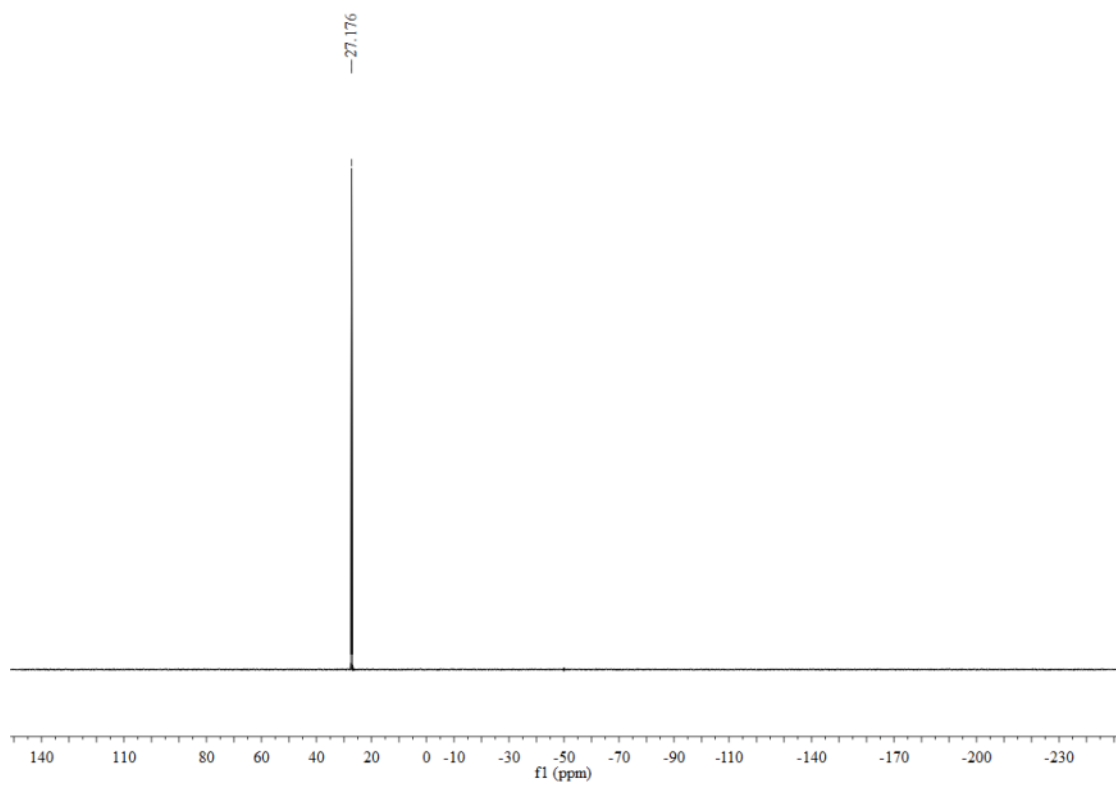

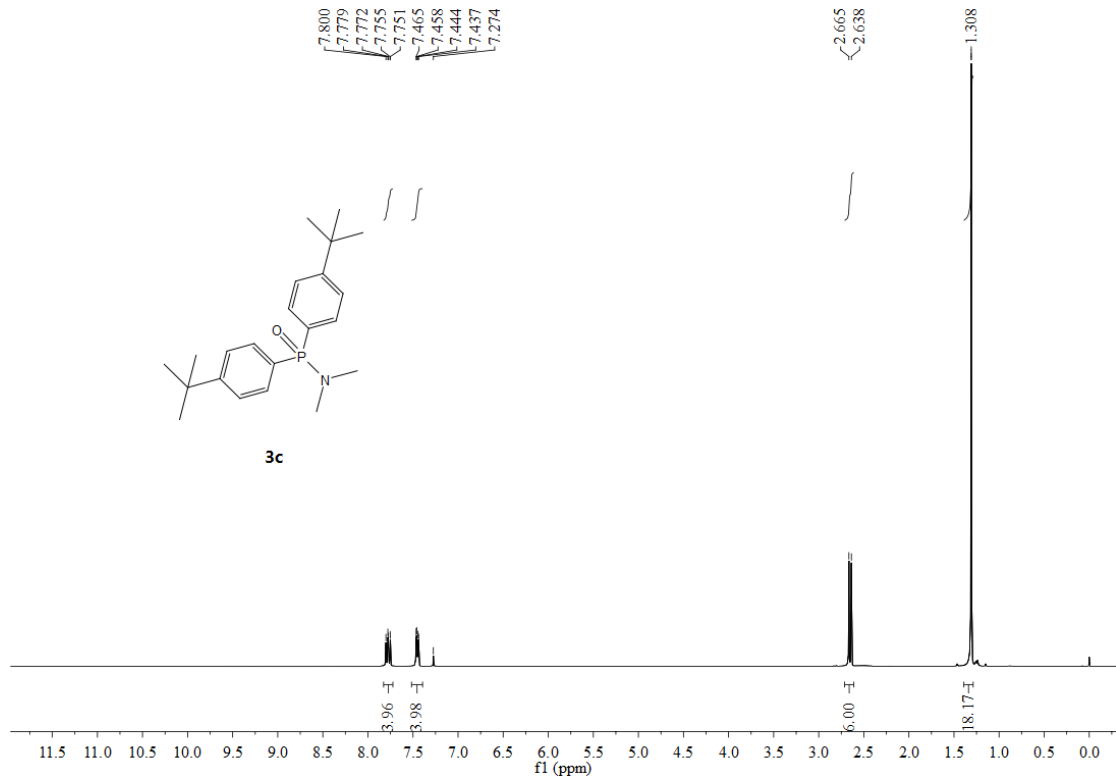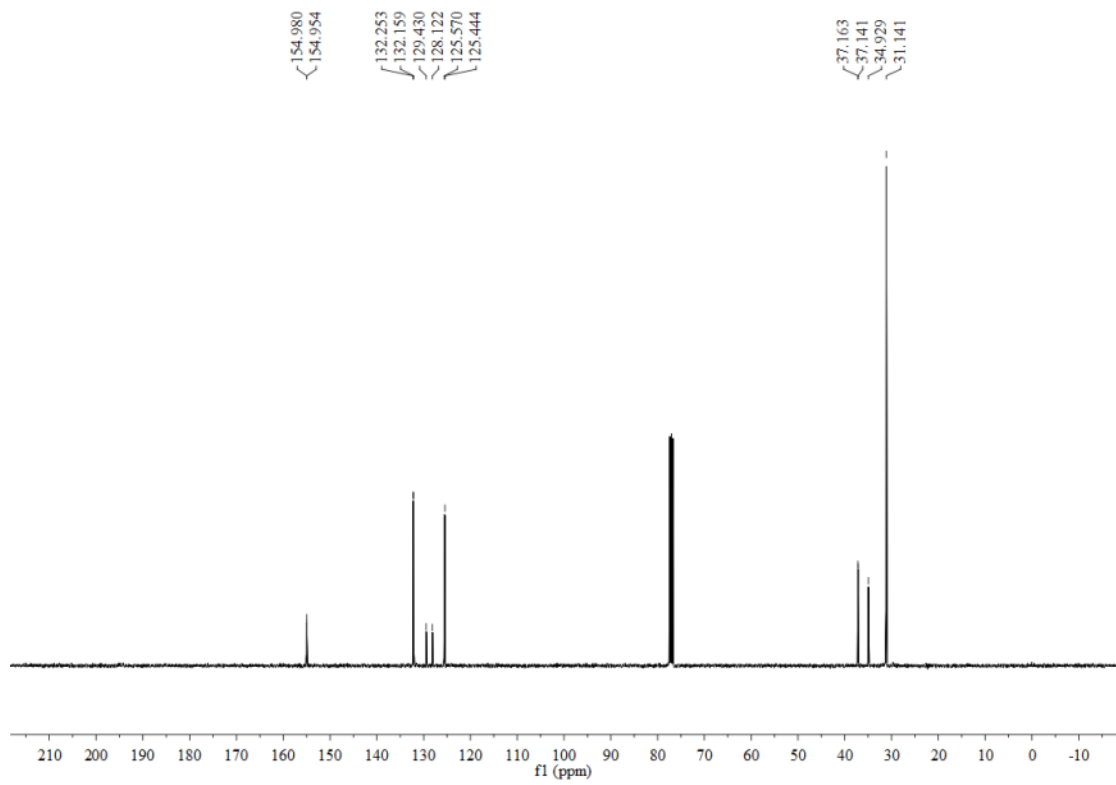



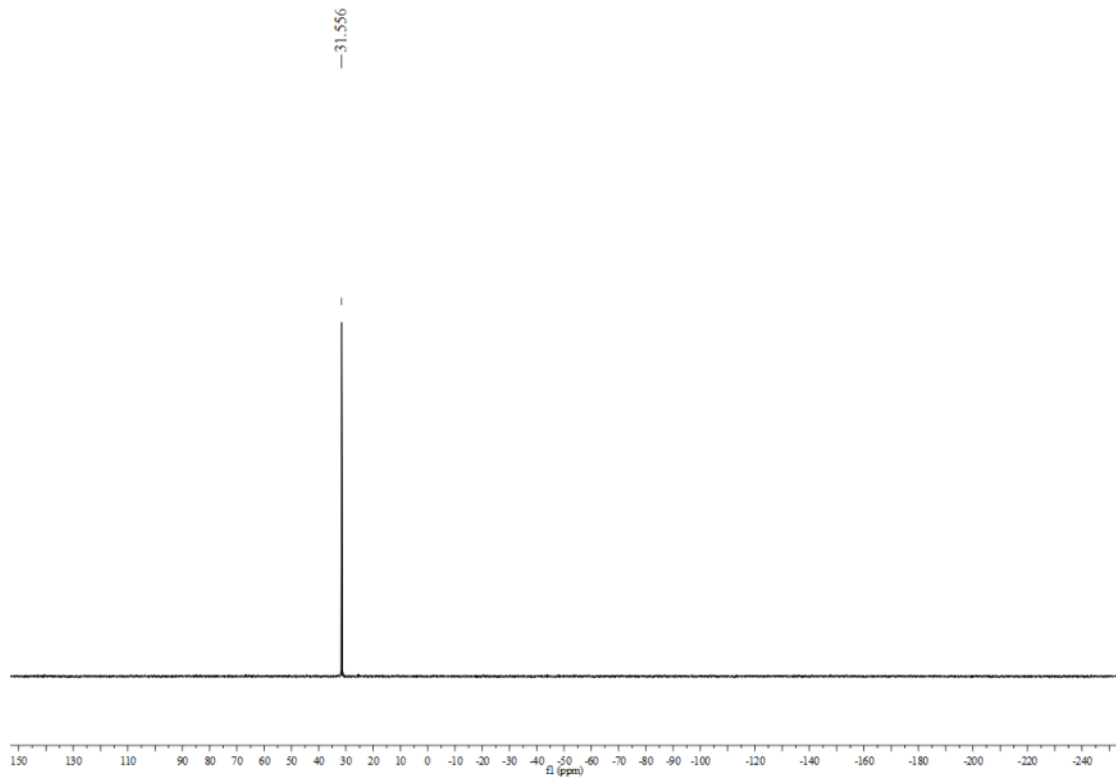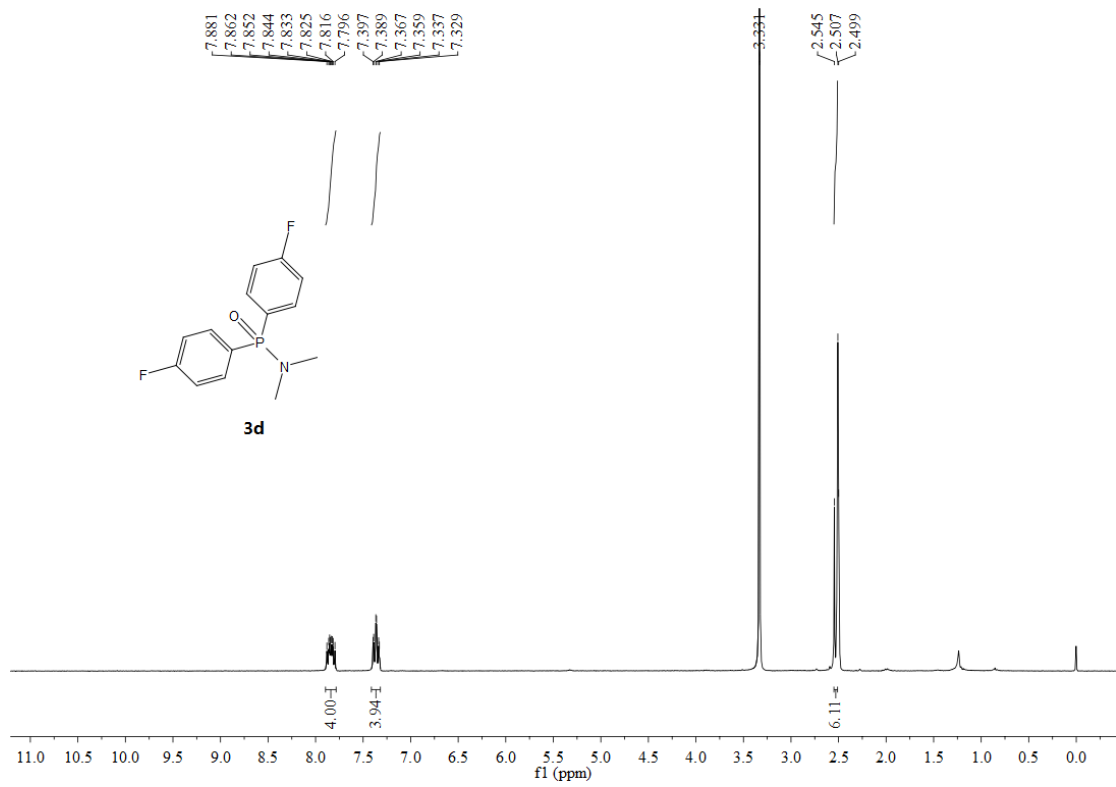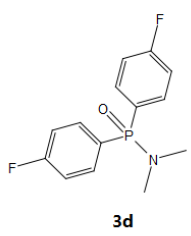

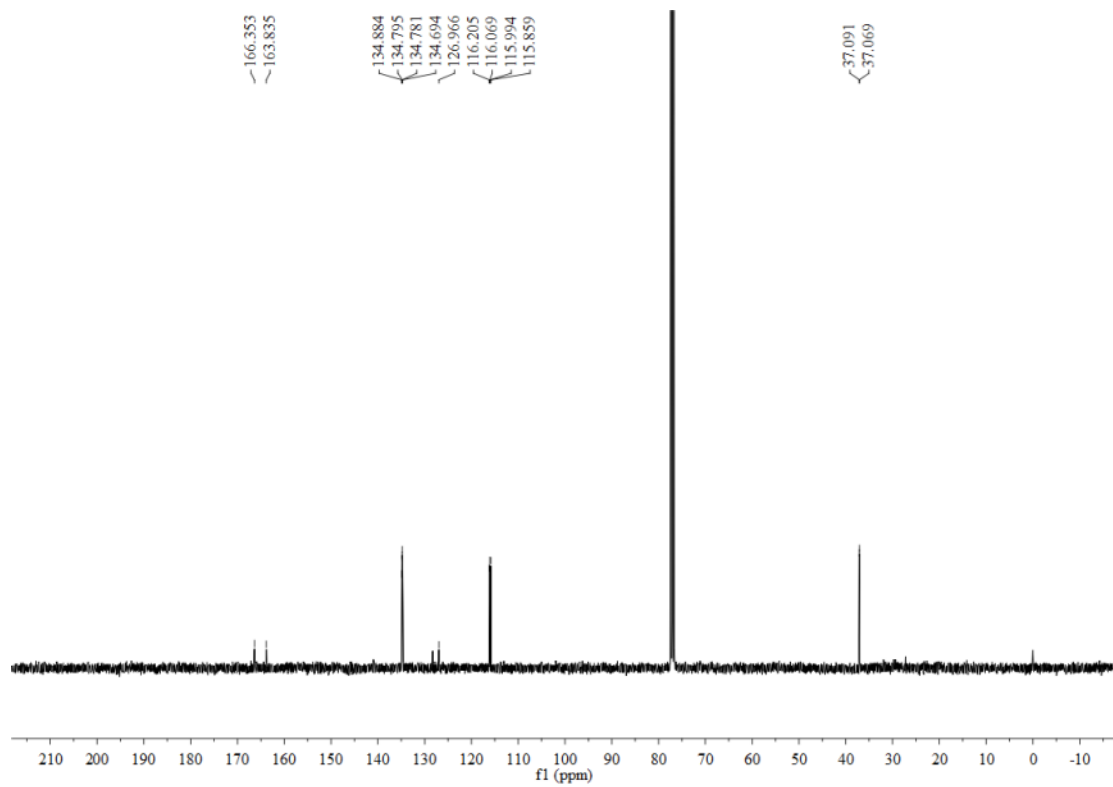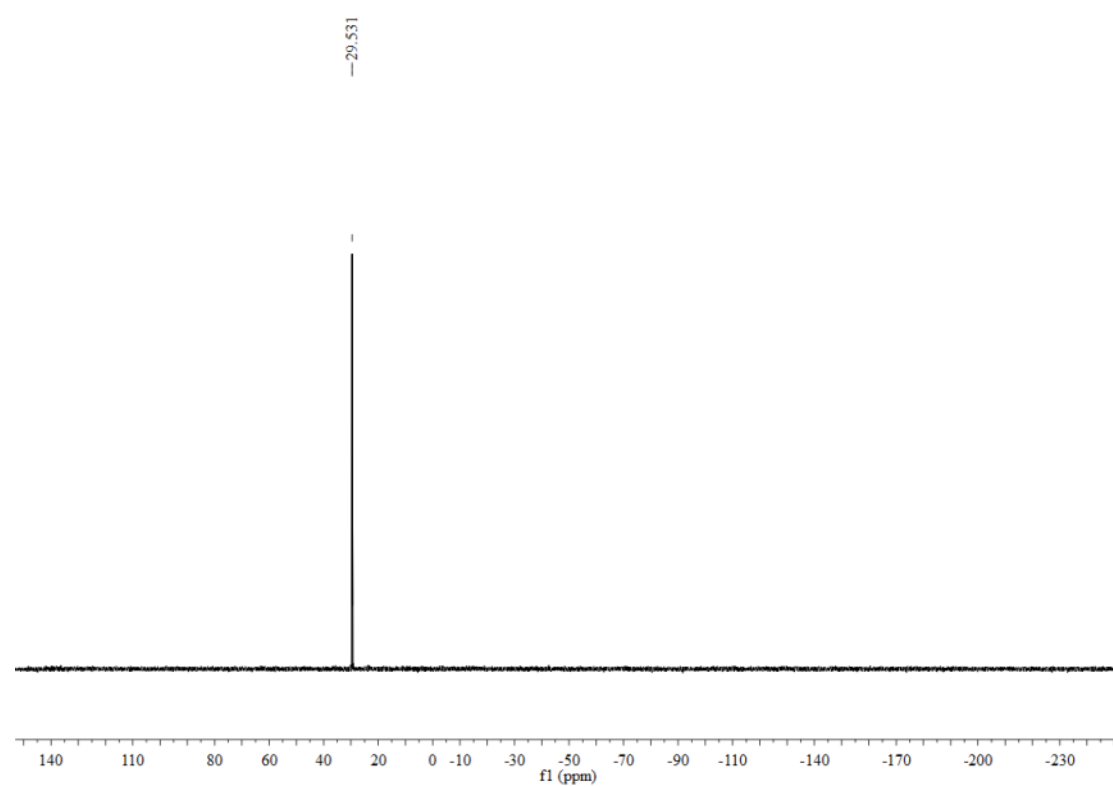

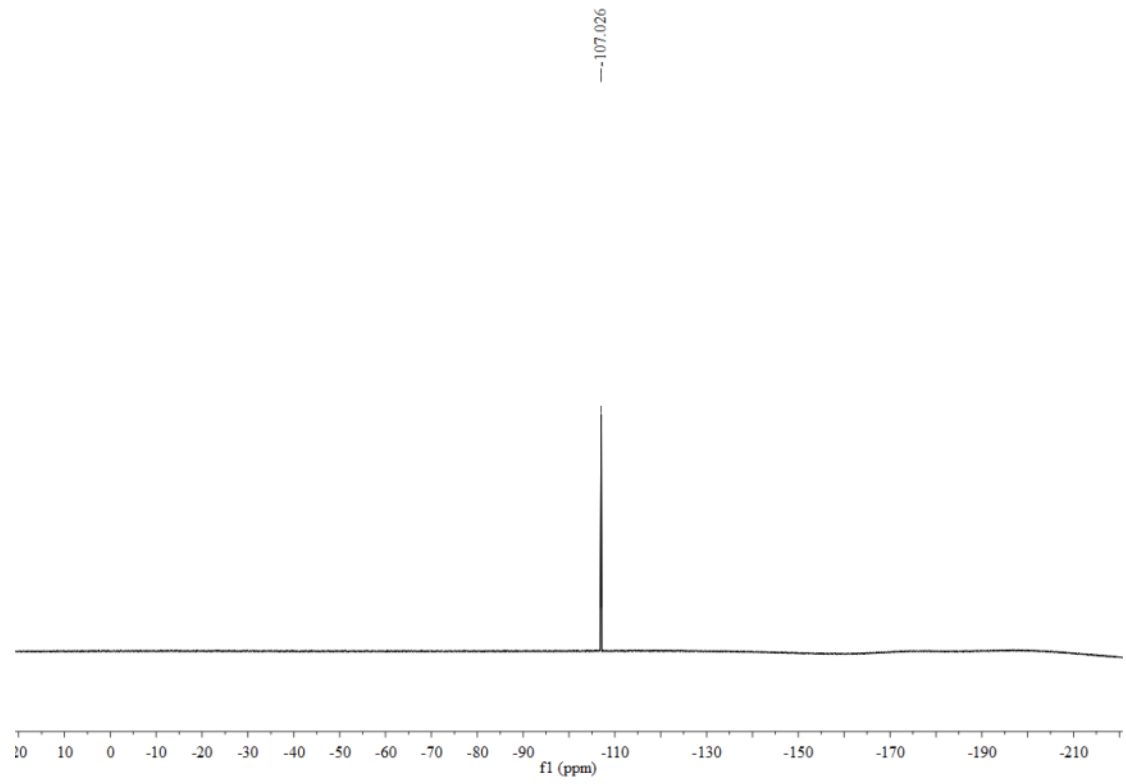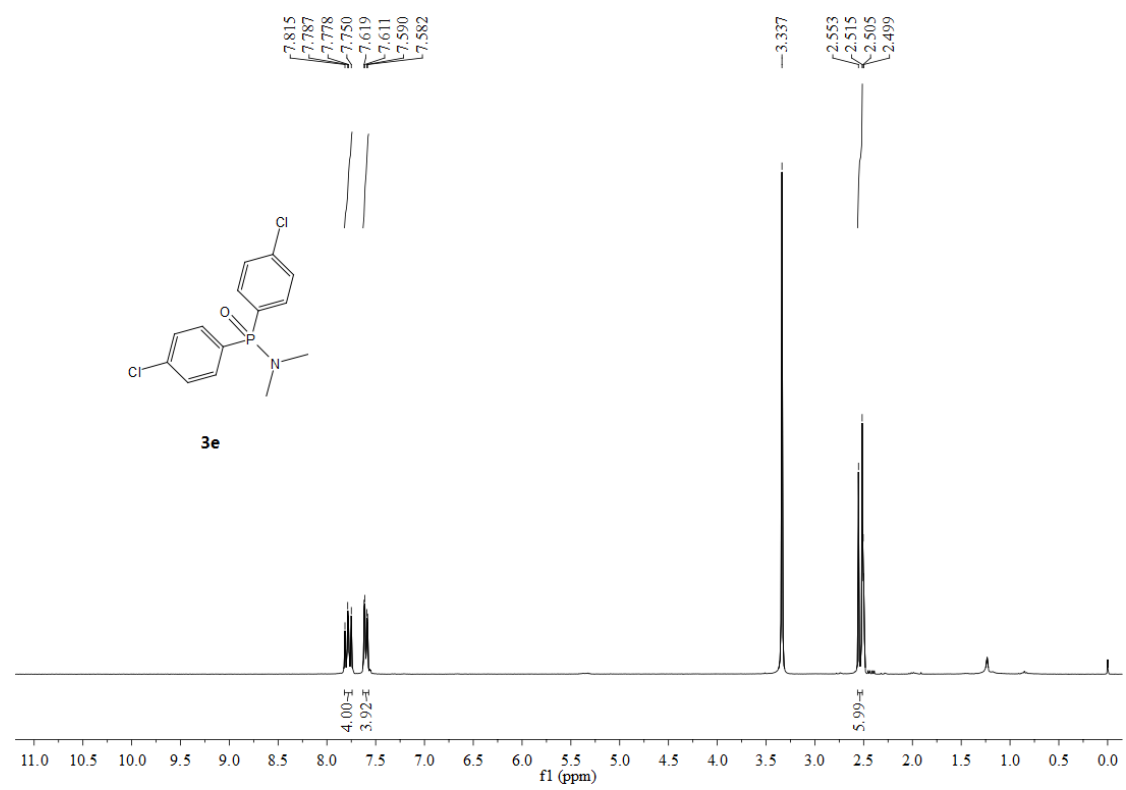

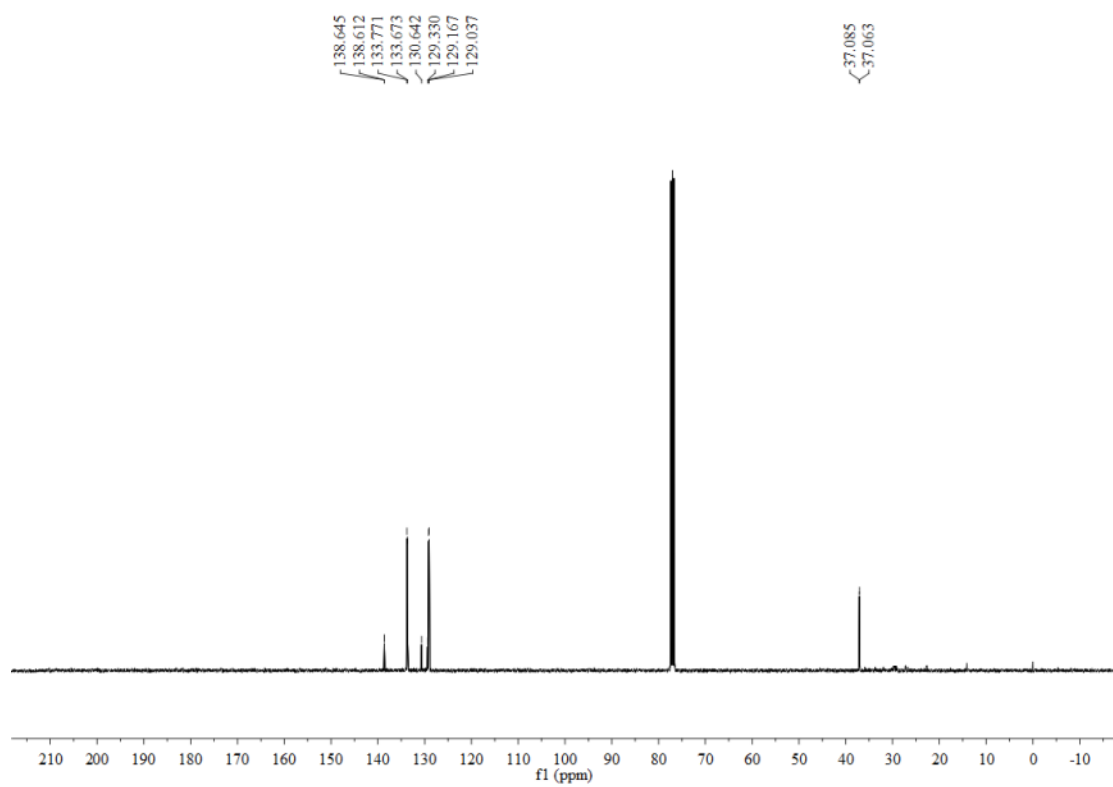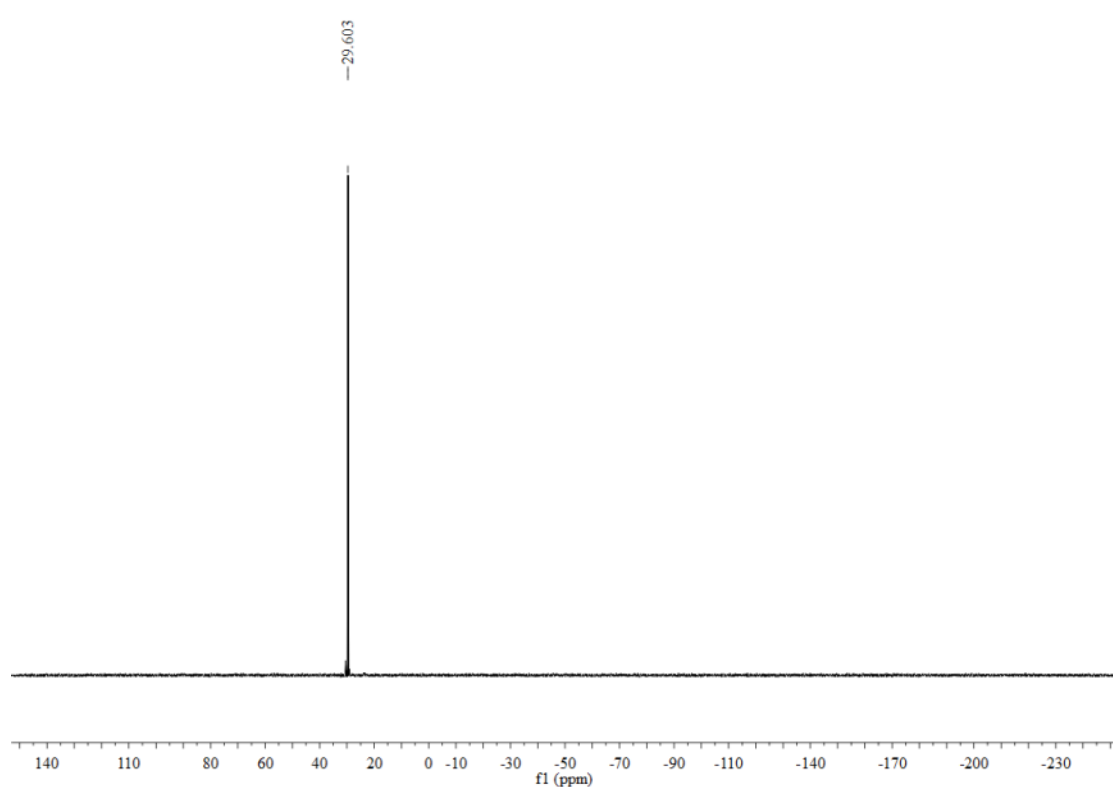

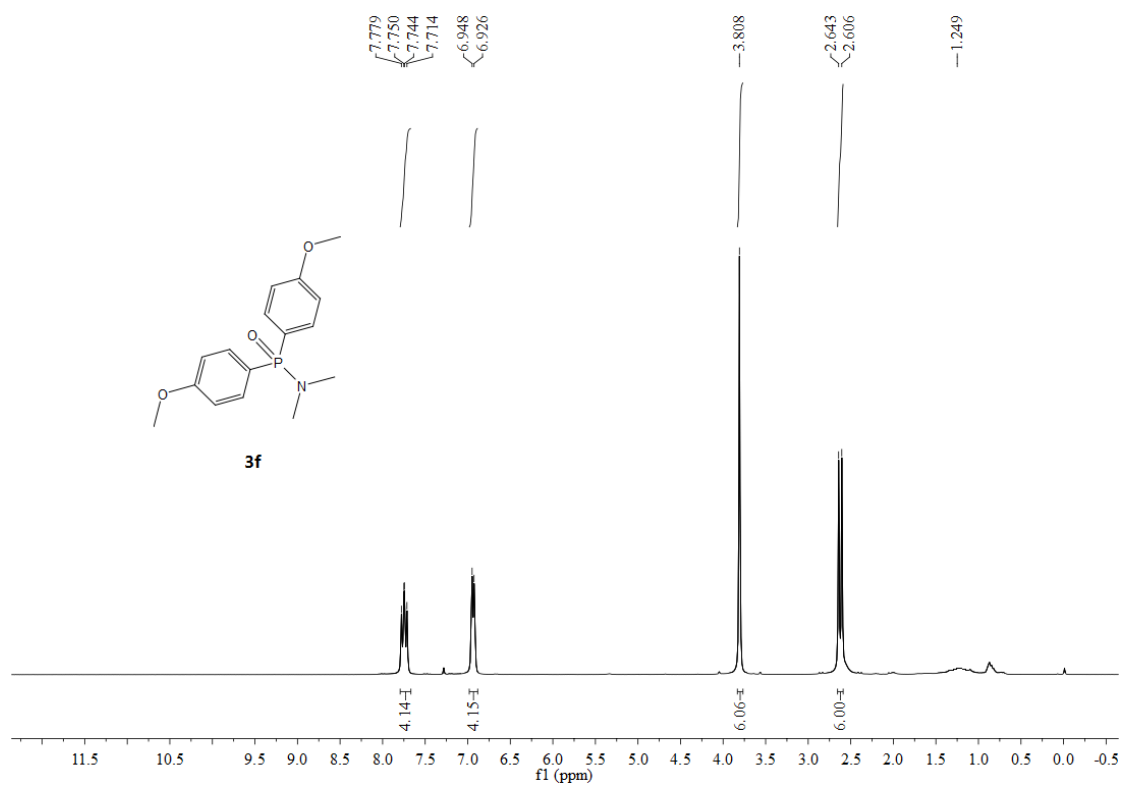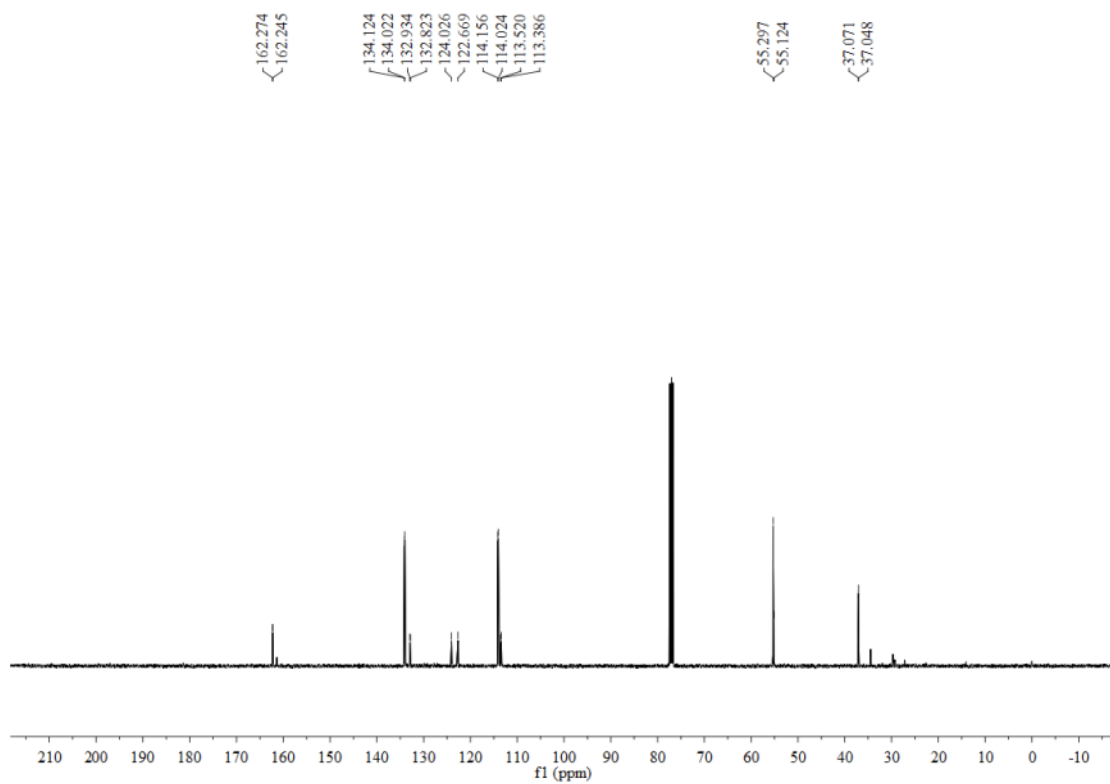

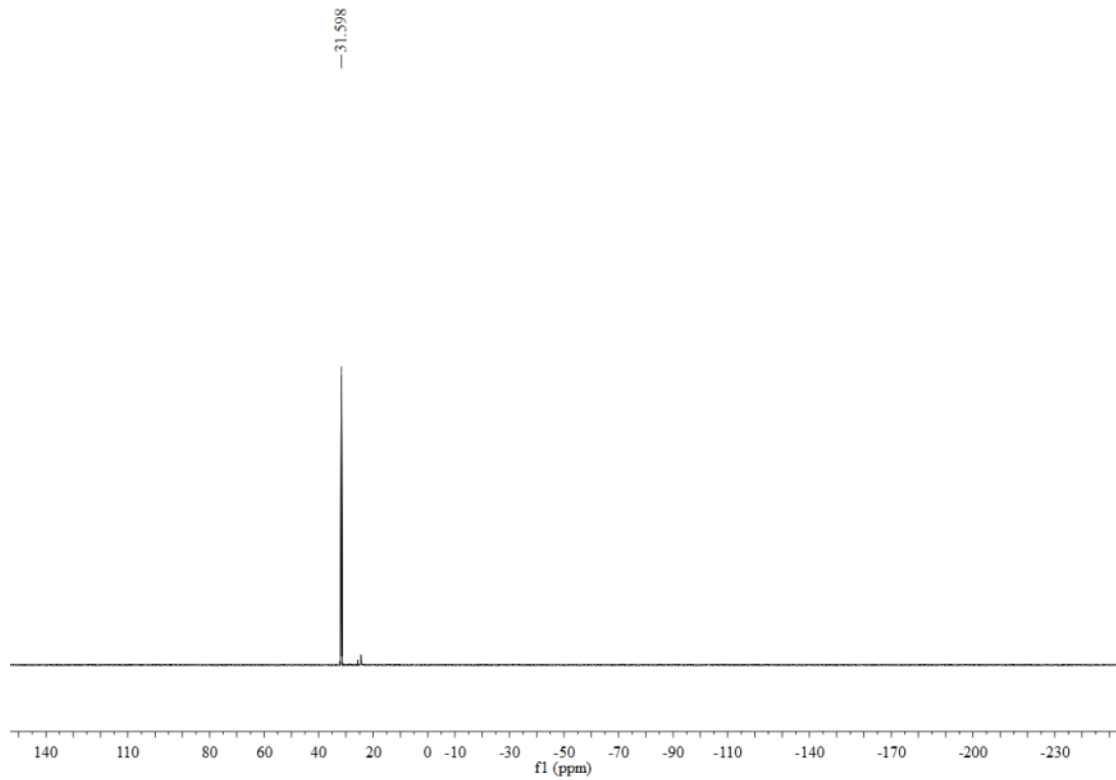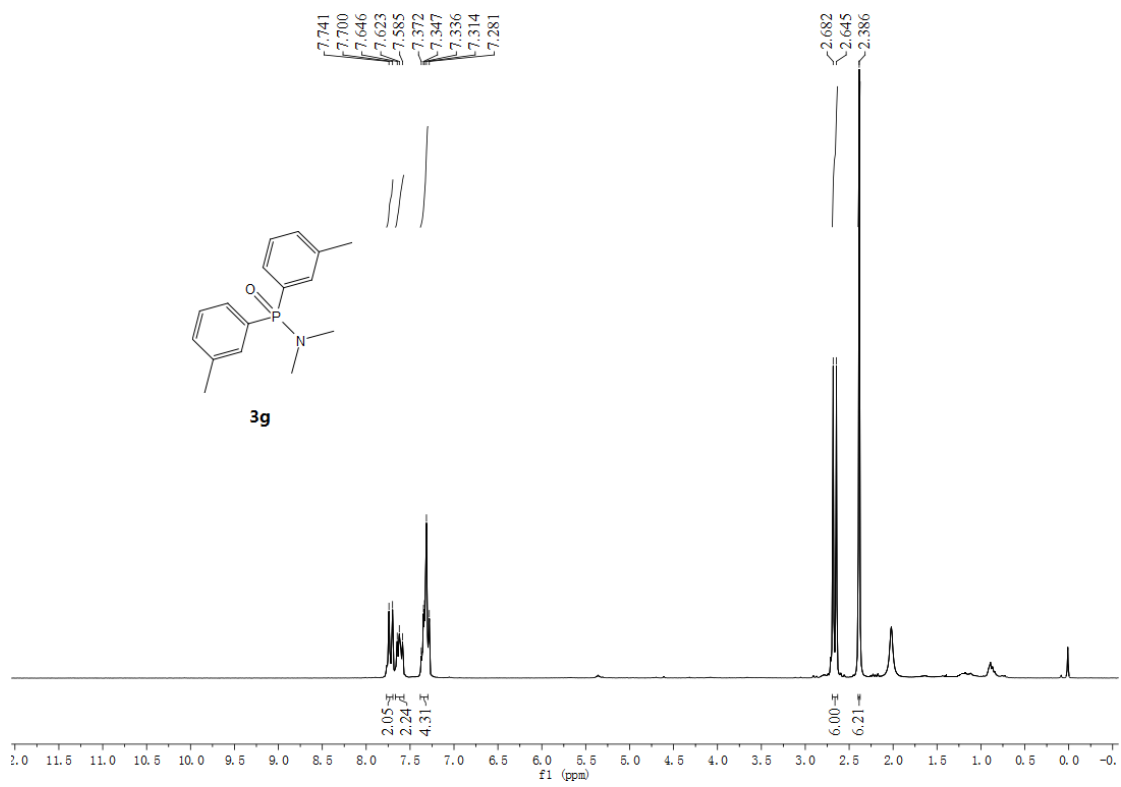

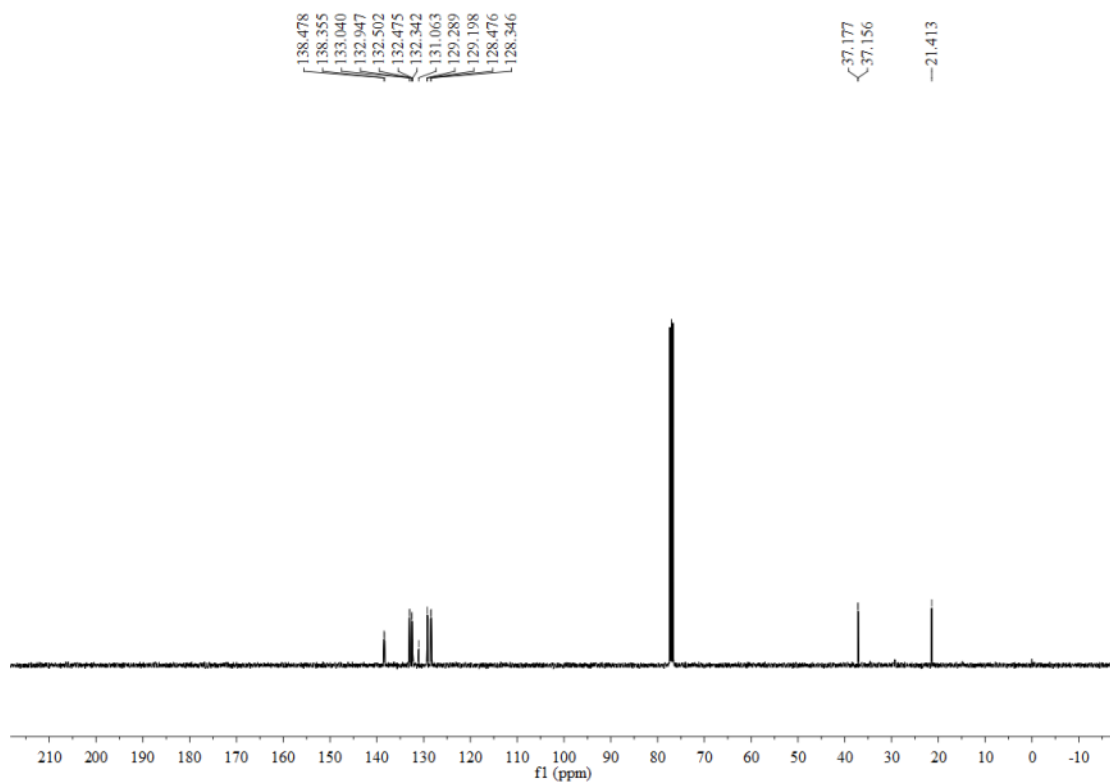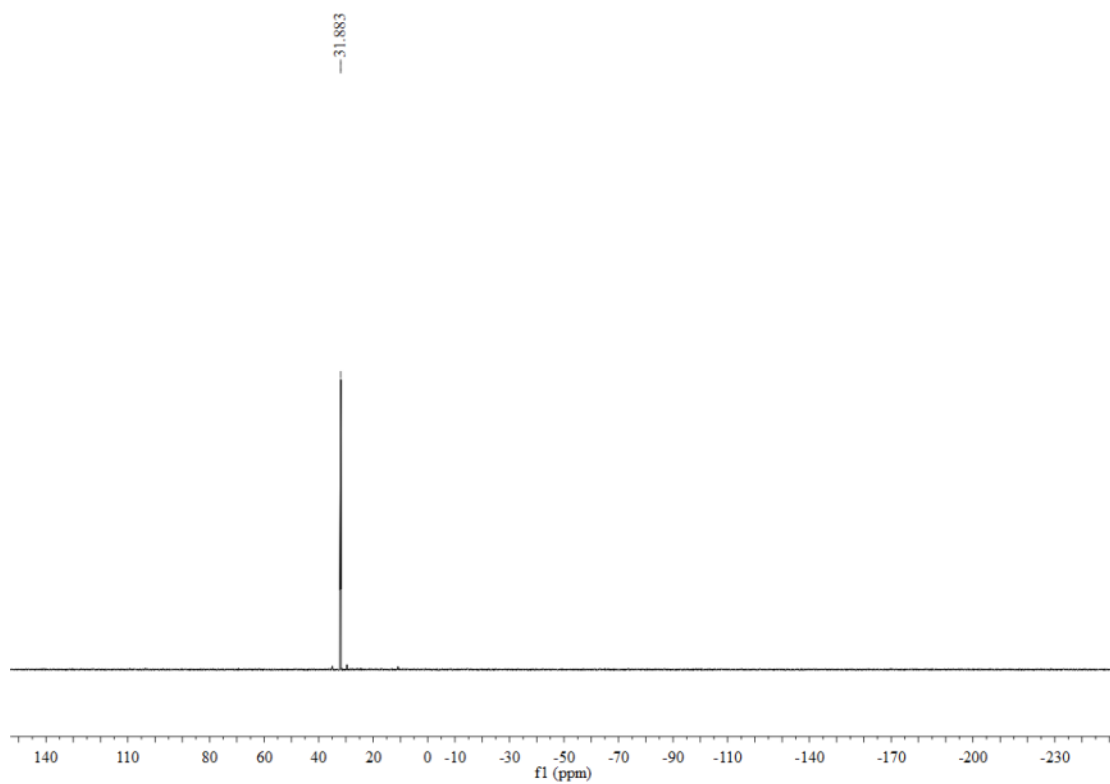

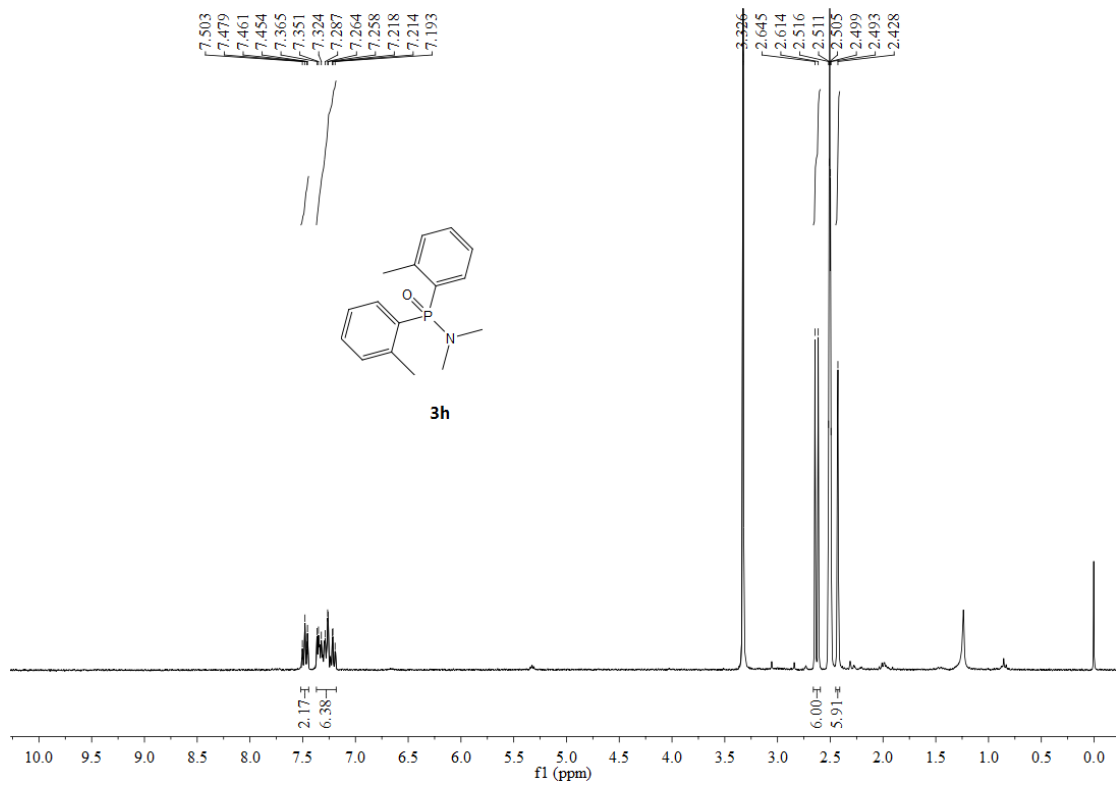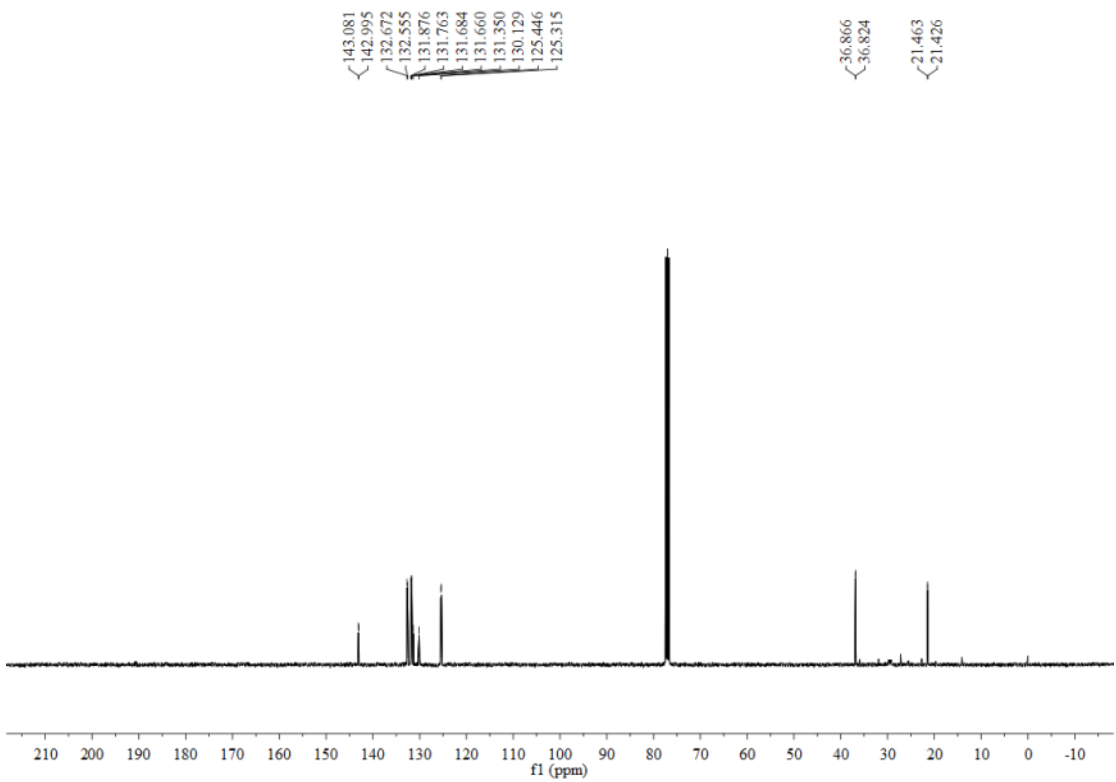



-36.997

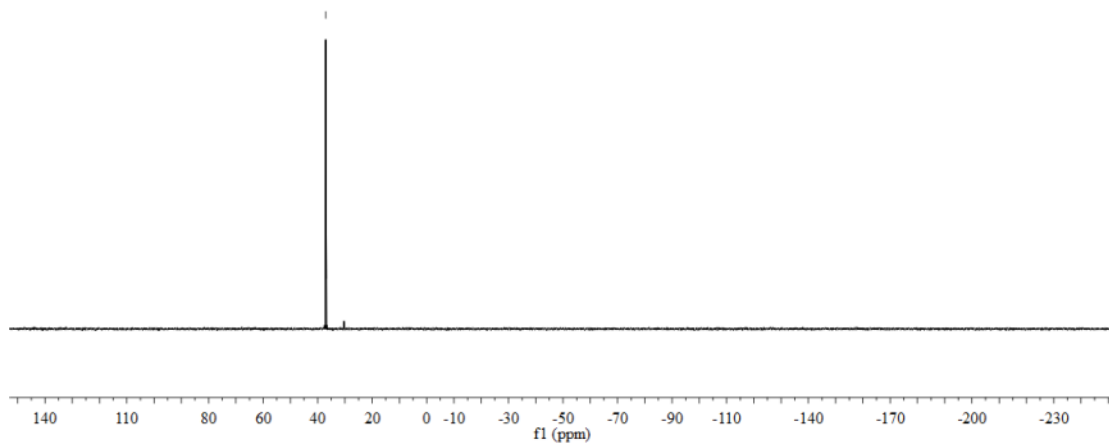

7.471  
7.433  
7.078

2.648  
2.612  
2.311

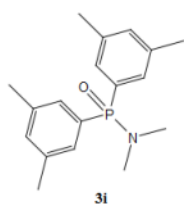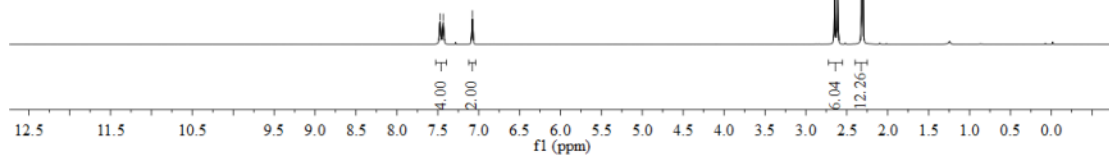

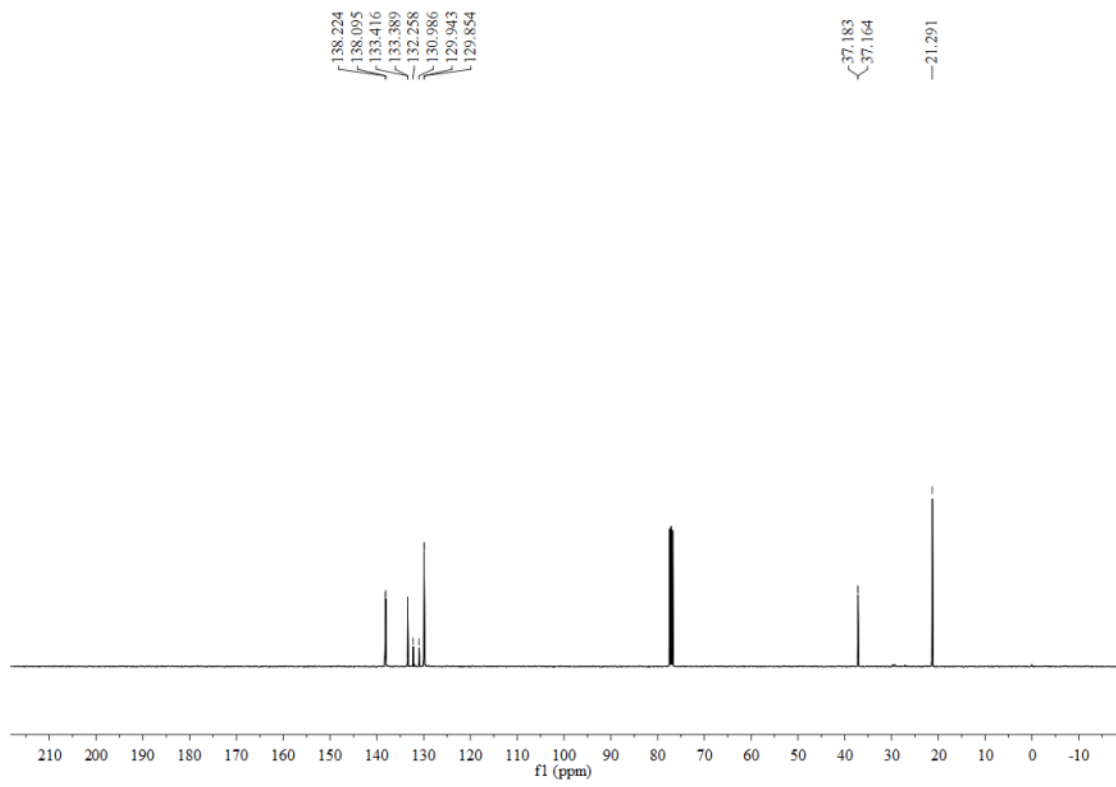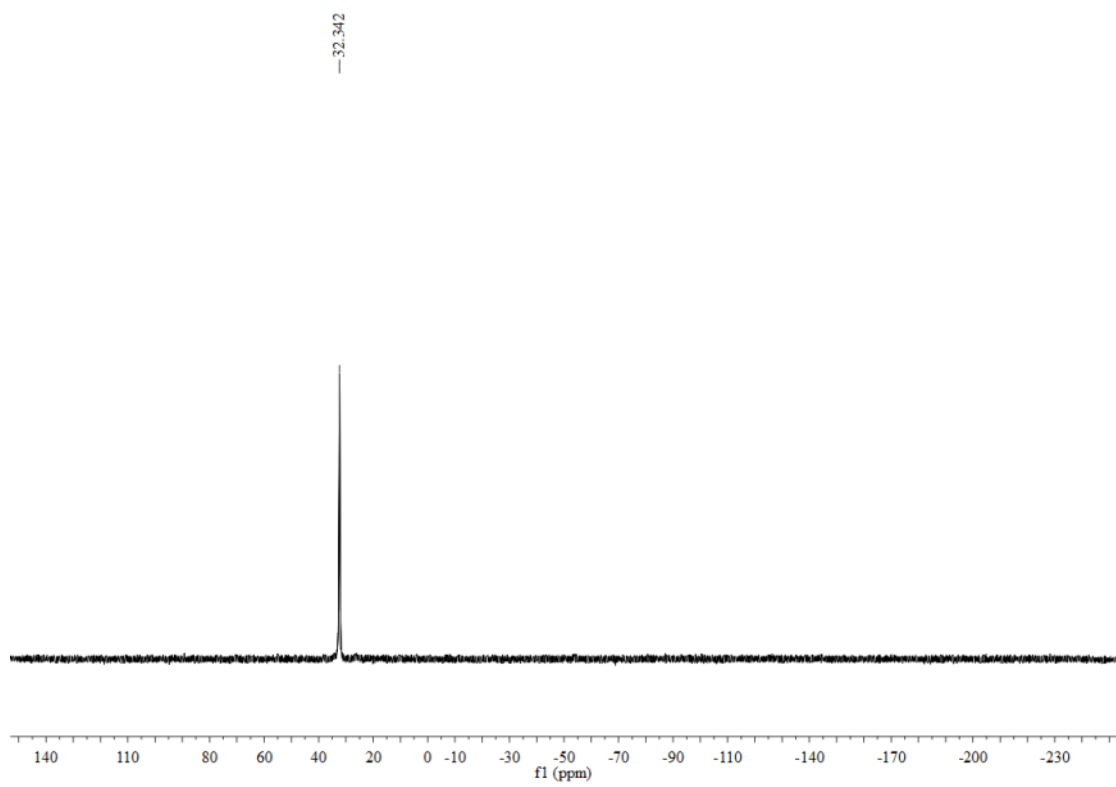

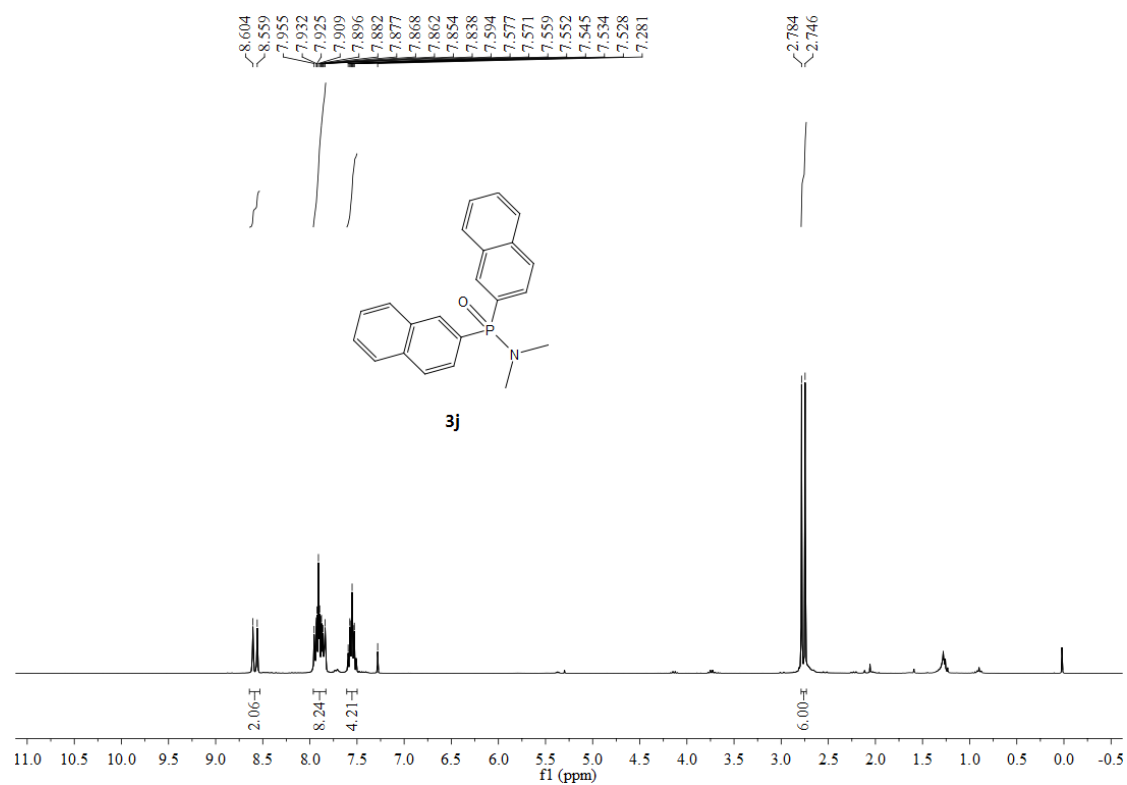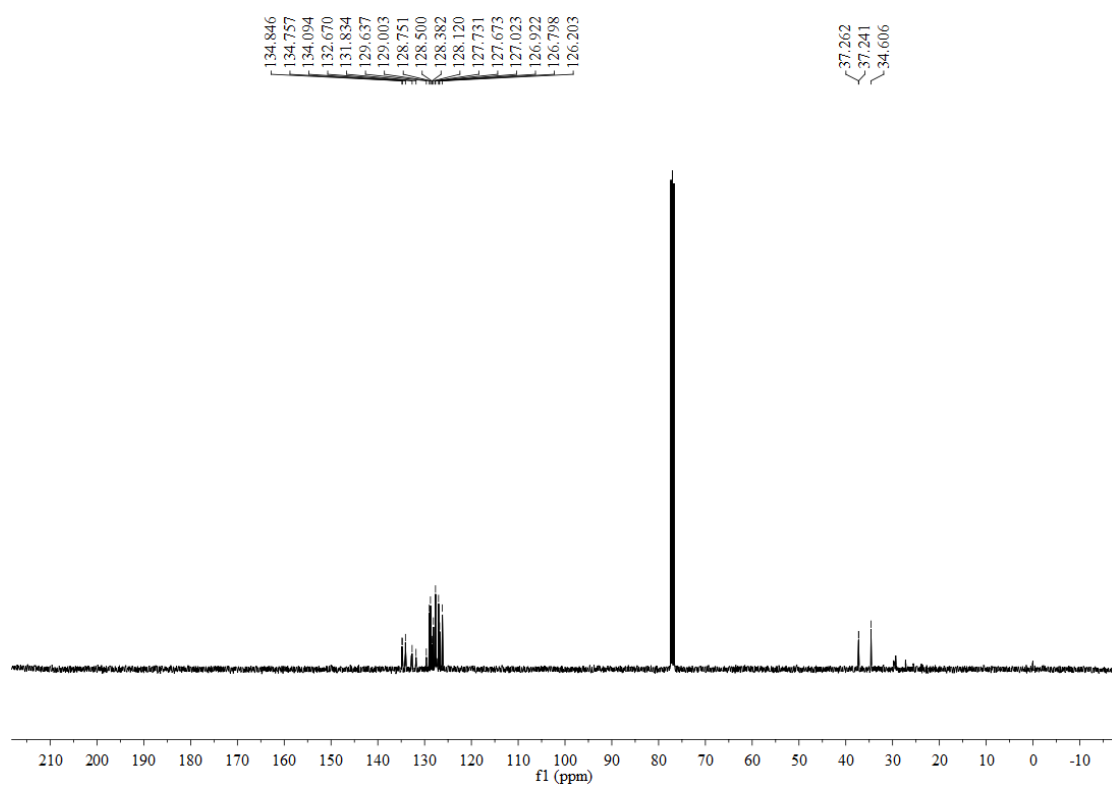

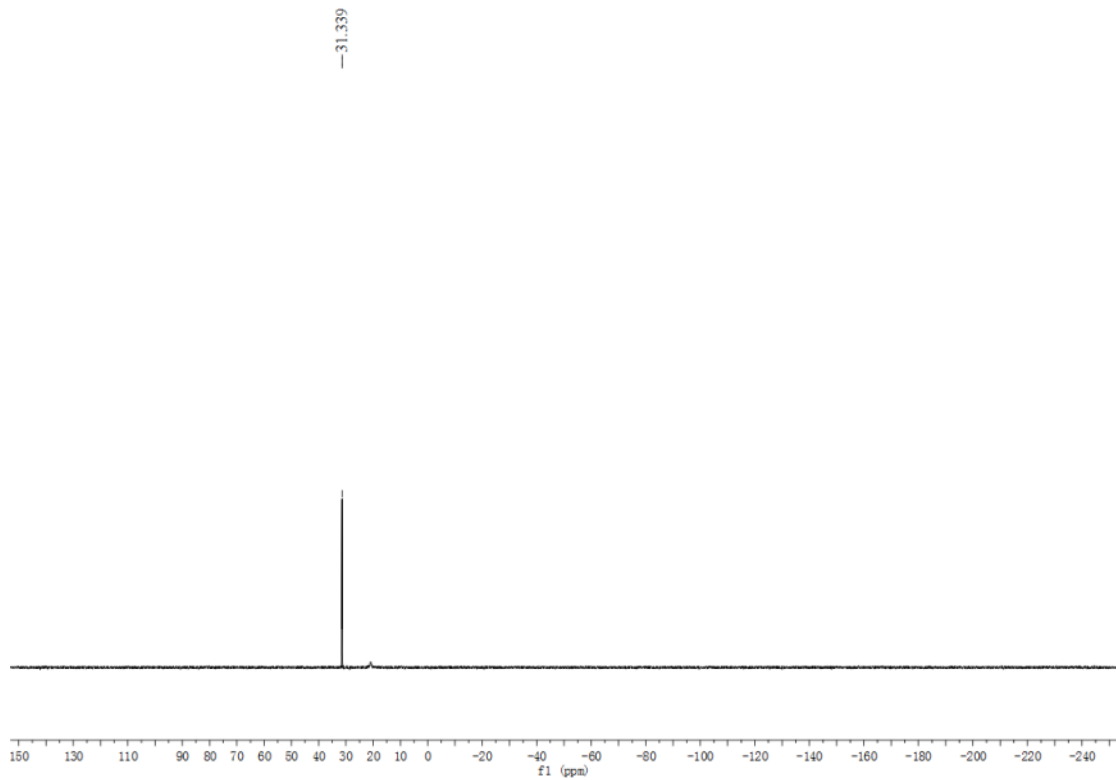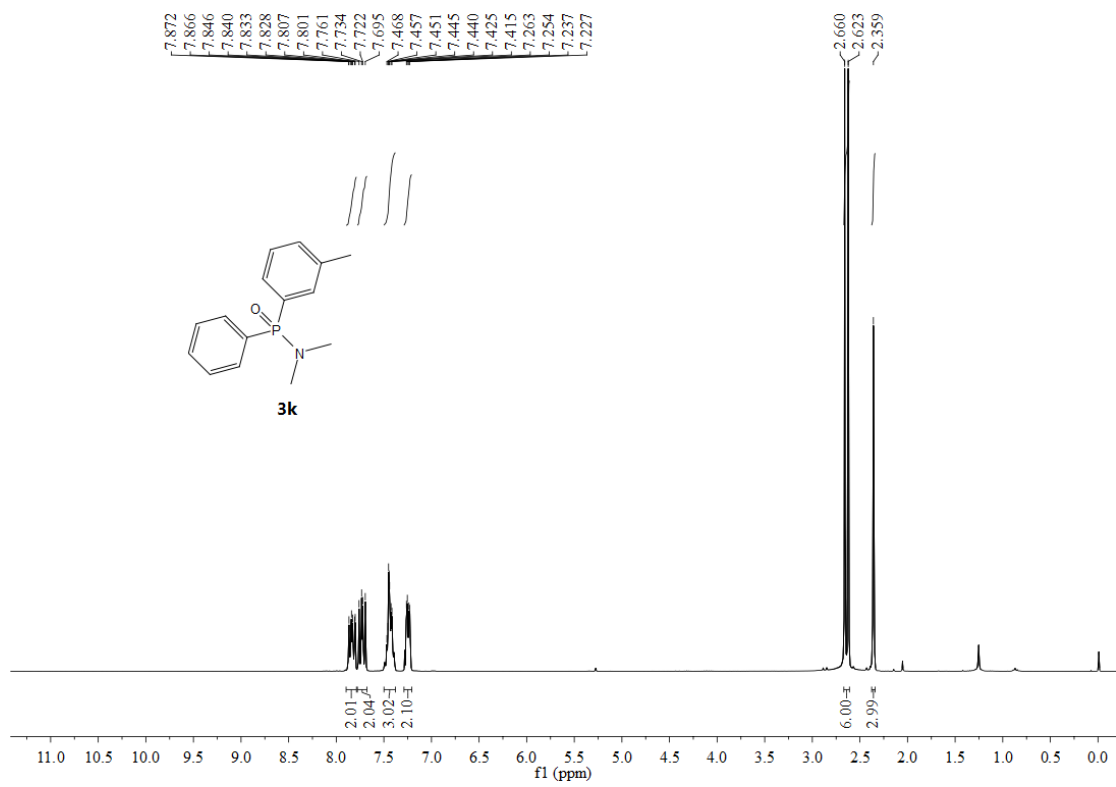

7.872  
7.866  
7.846  
7.840  
7.833  
7.828  
7.807  
7.801  
7.761  
7.734  
7.722  
7.695  
7.468  
7.457  
7.451  
7.445  
7.440  
7.425  
7.415  
7.263  
7.254  
7.237  
7.227

2.660  
2.623  
2.359

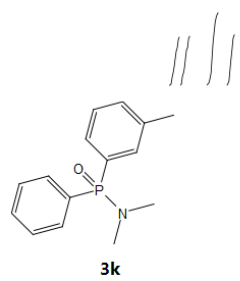

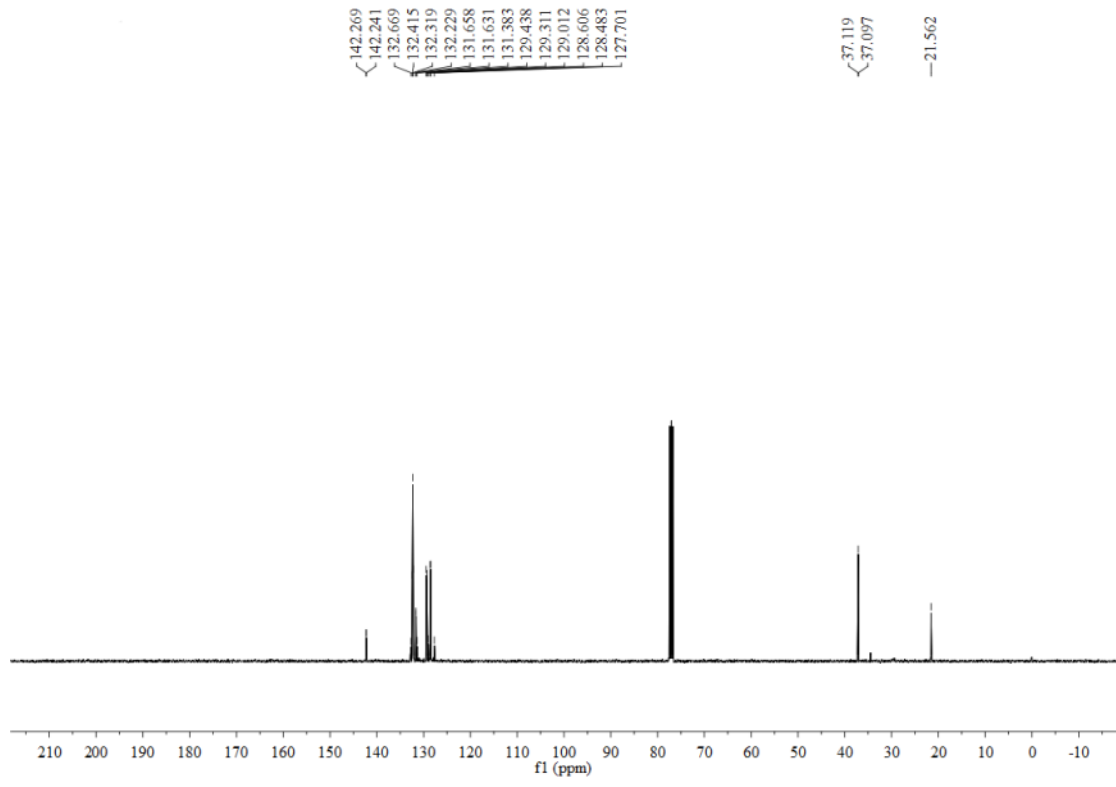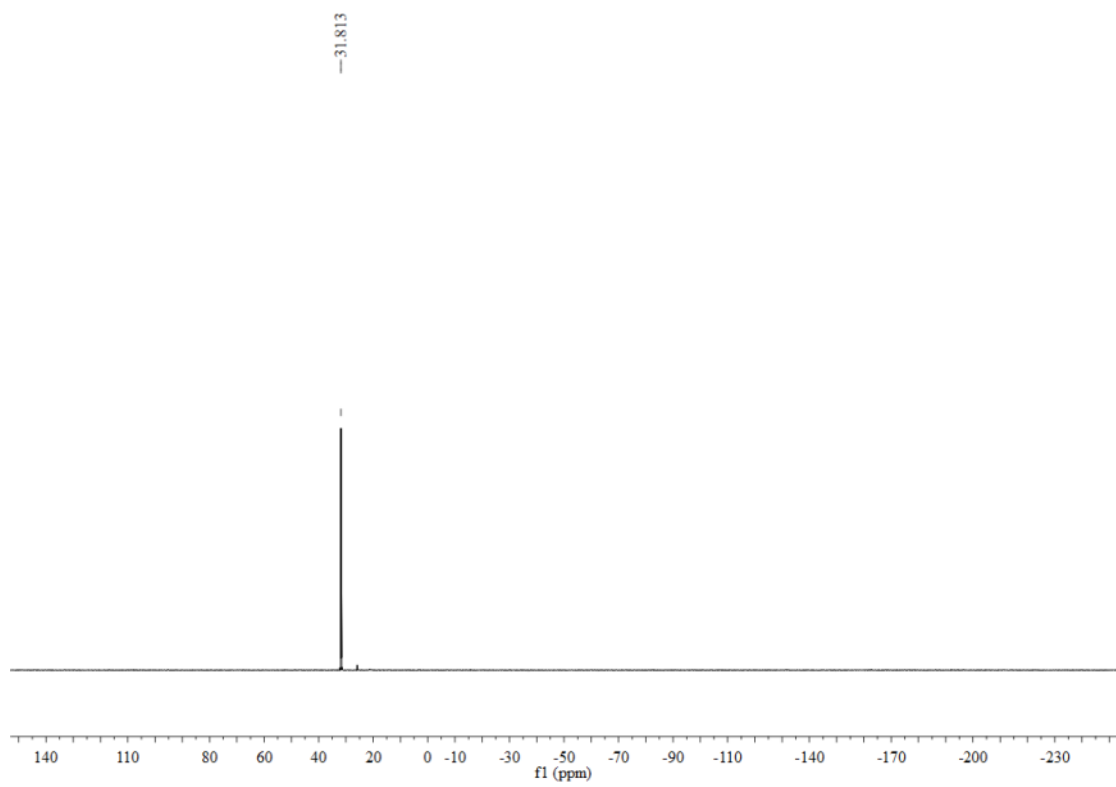

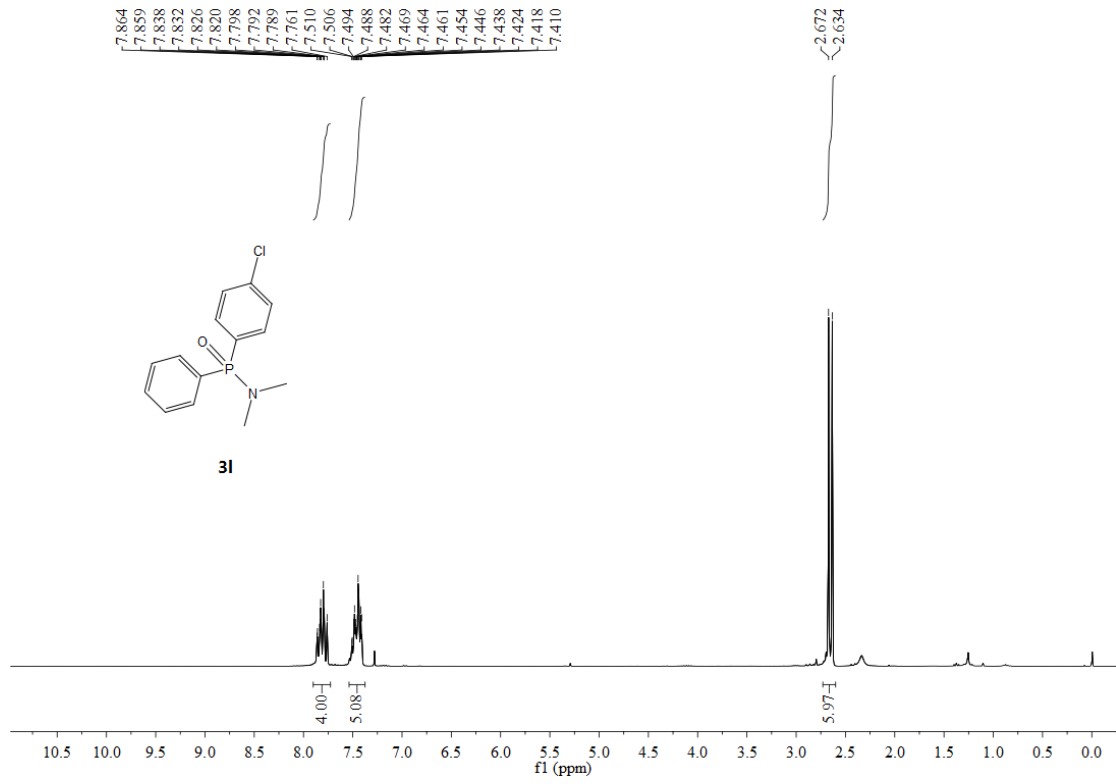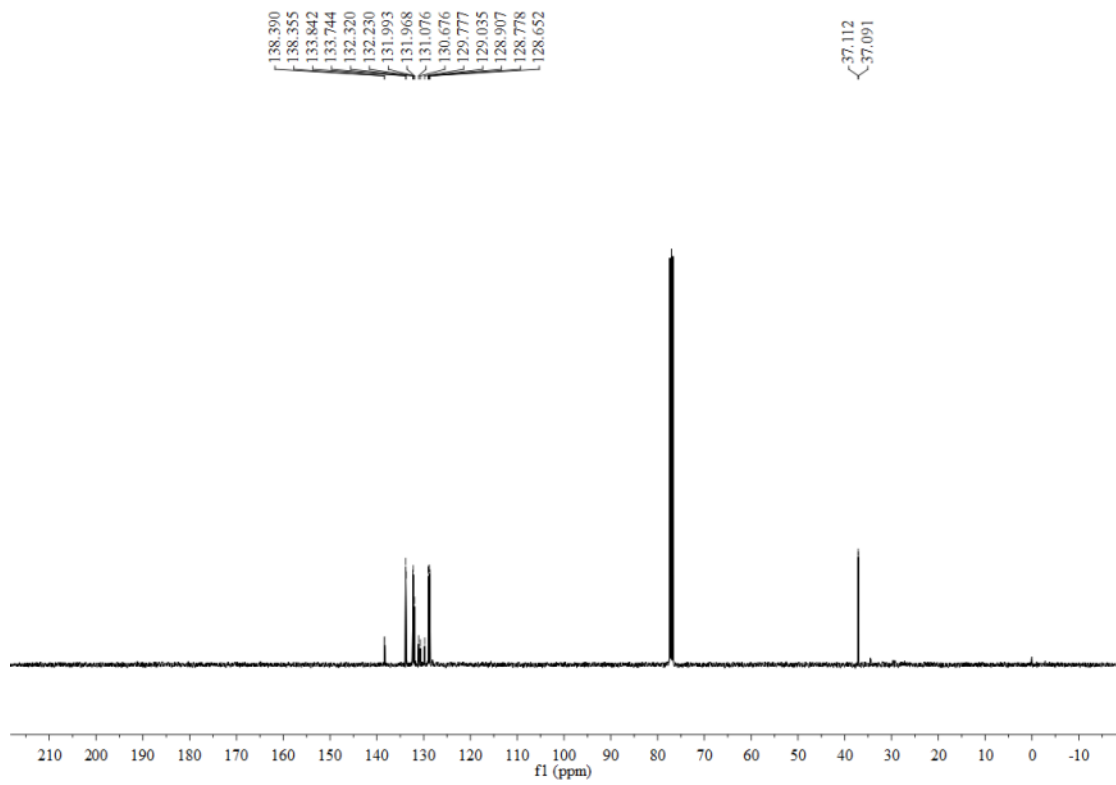

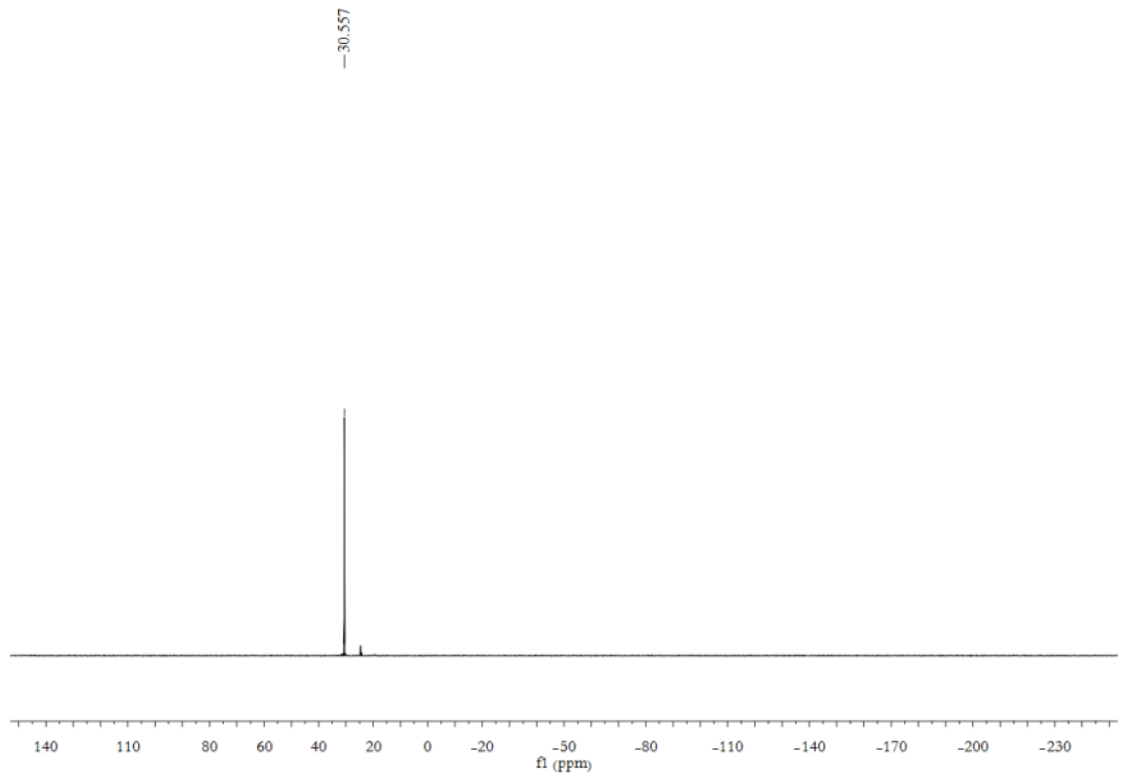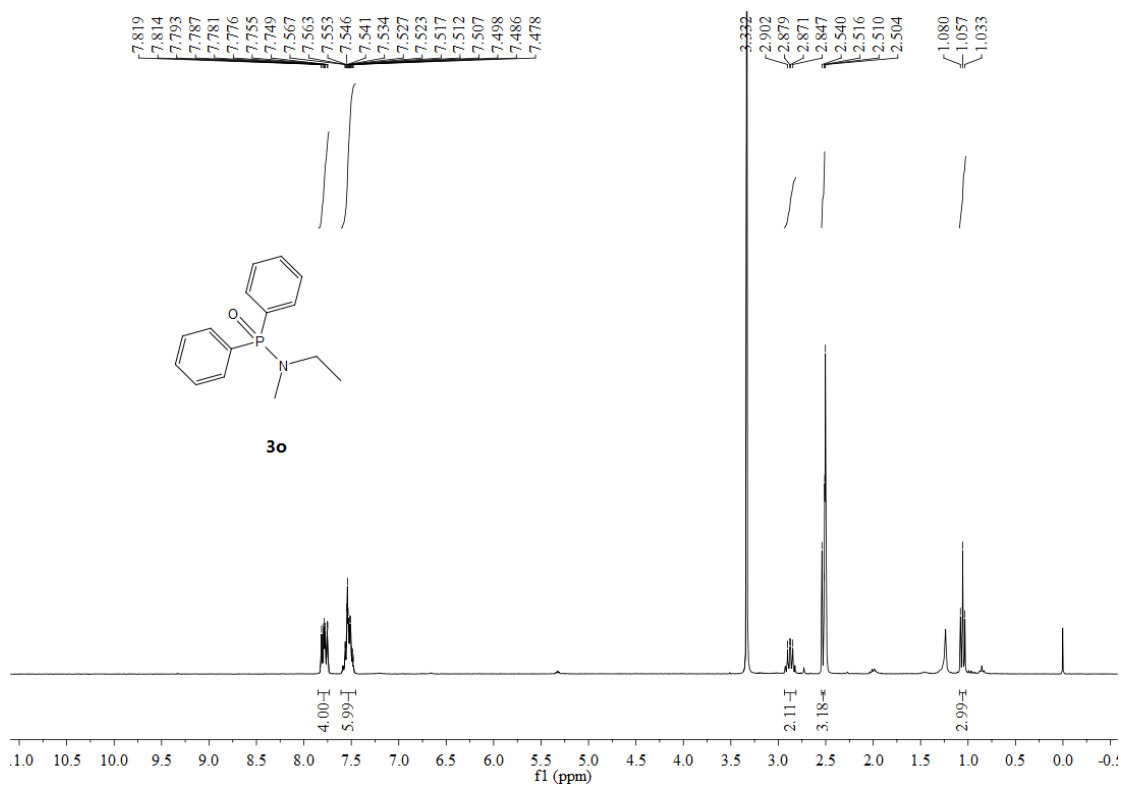

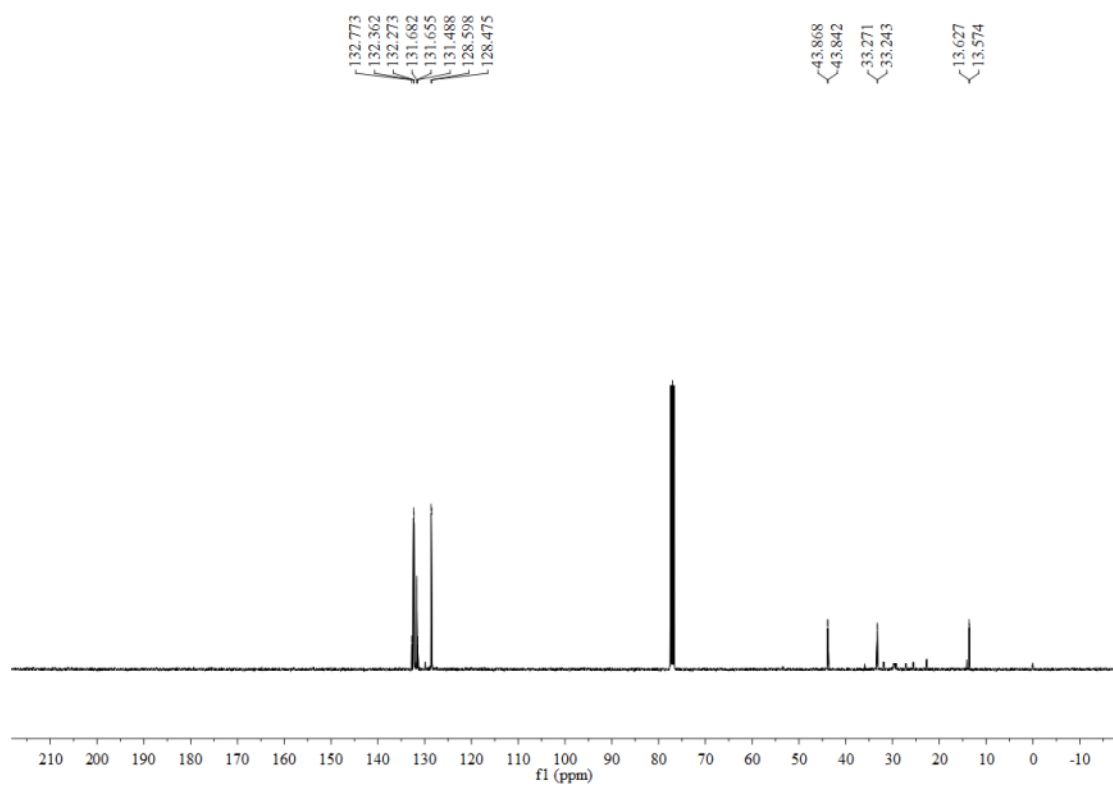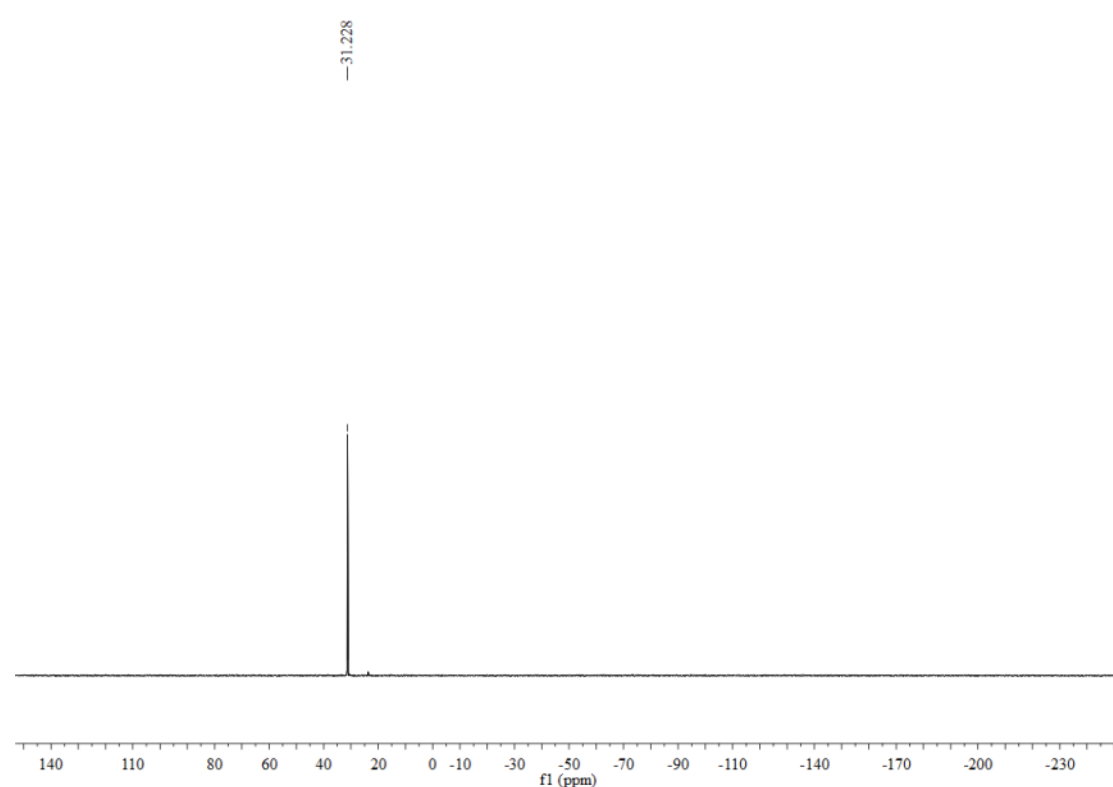



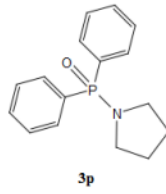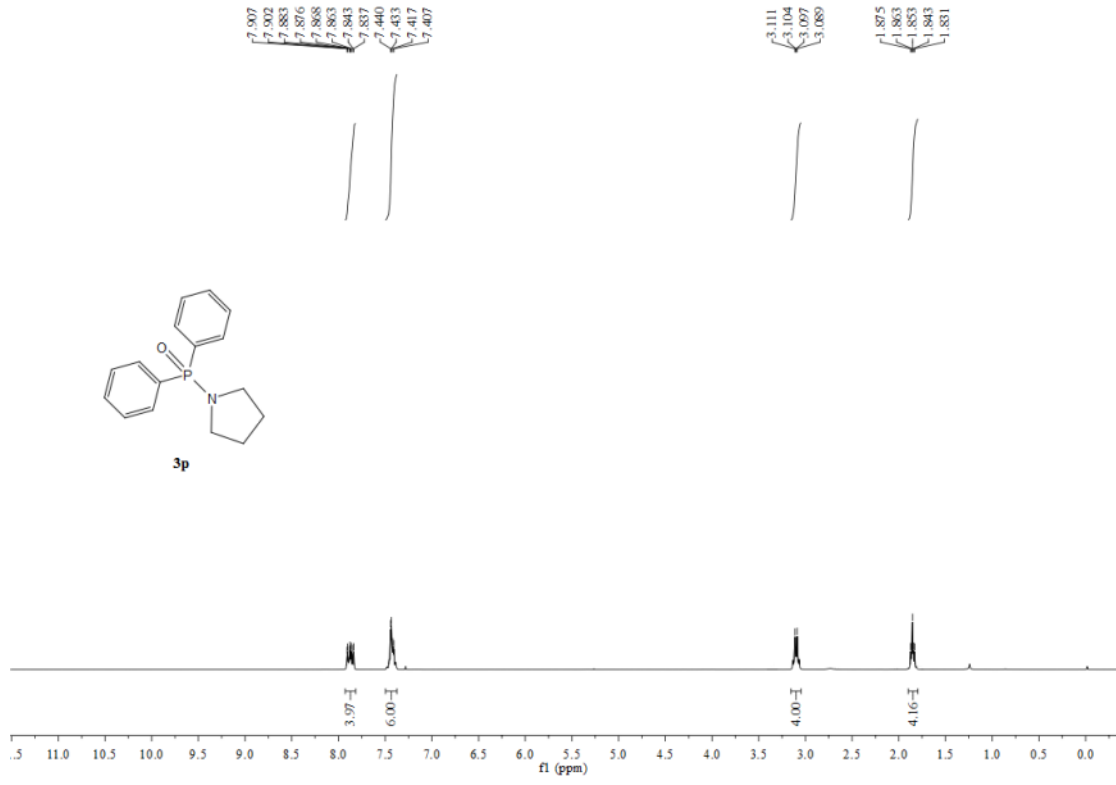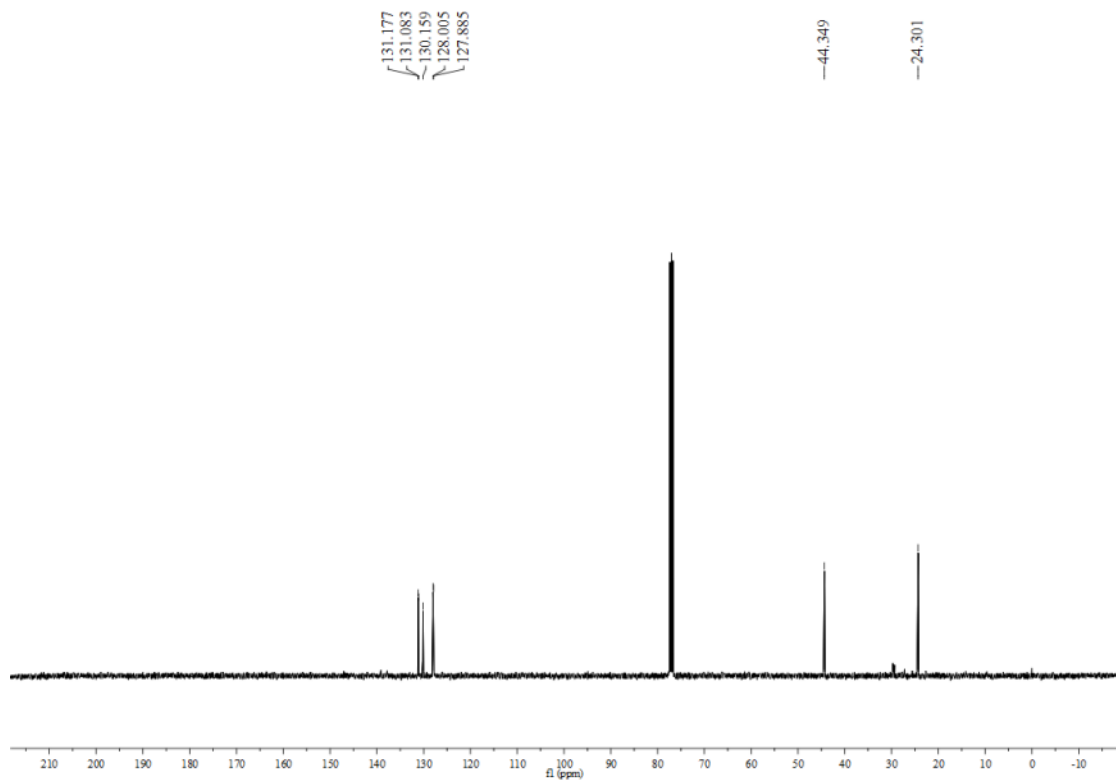

-21.427

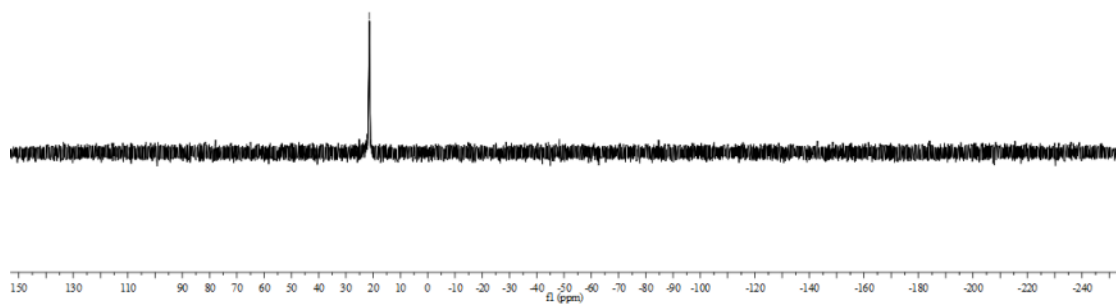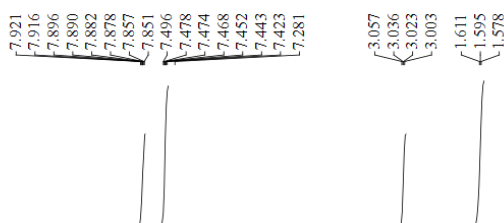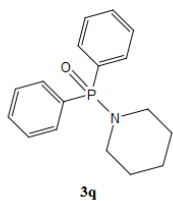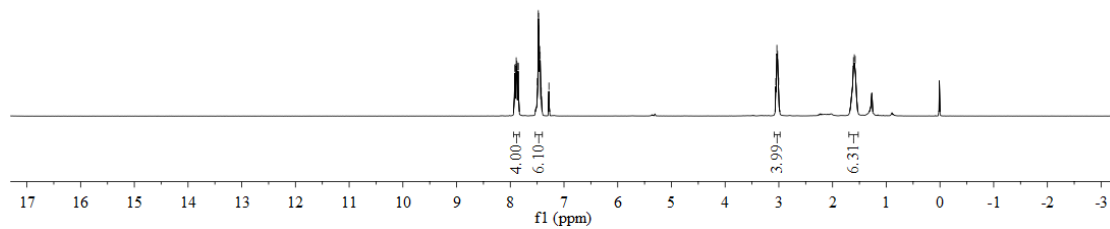

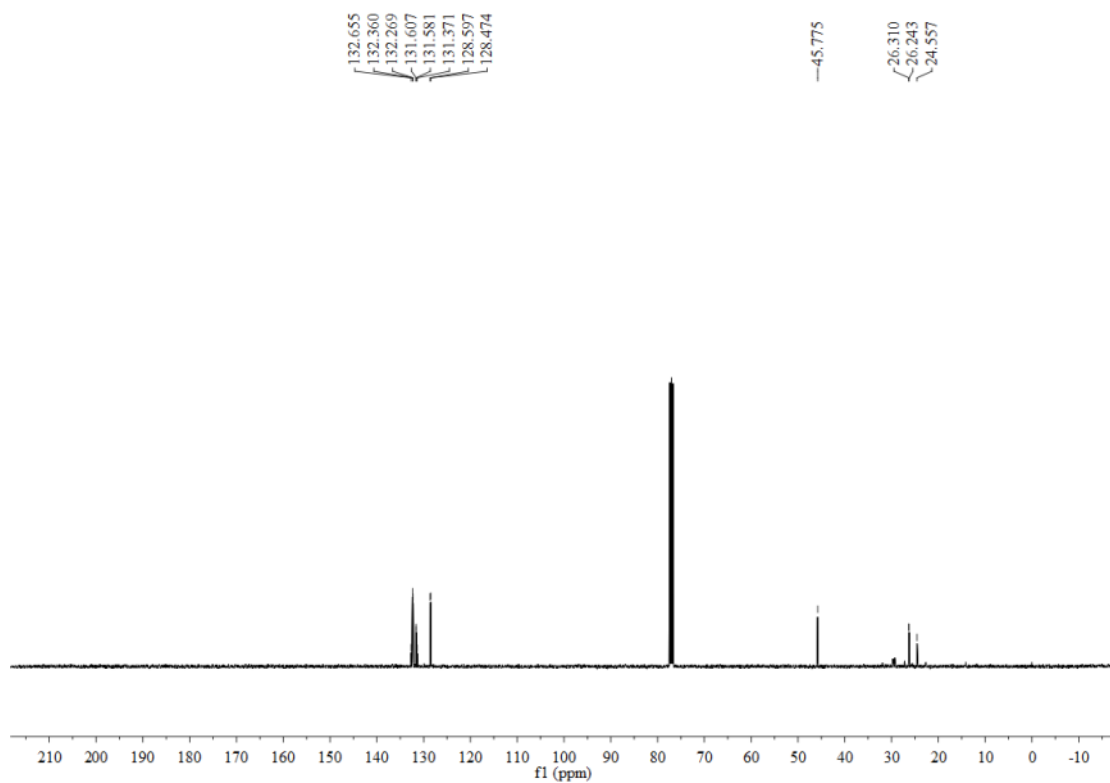

h-37

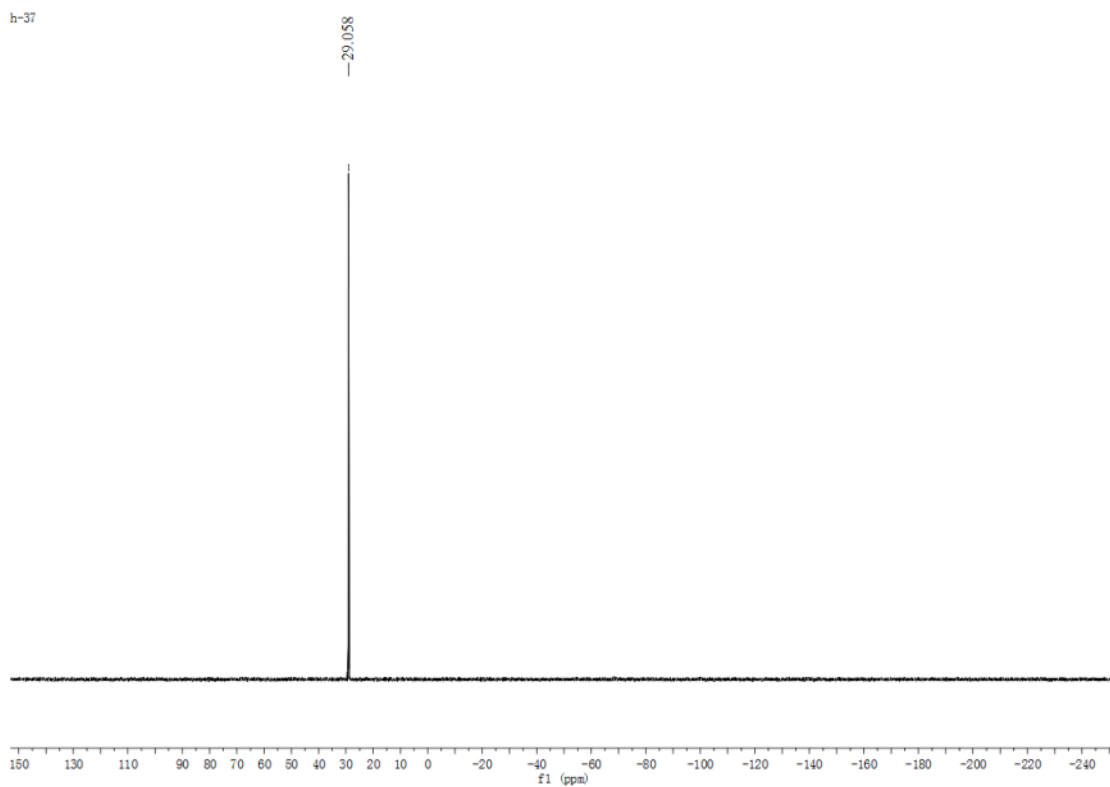

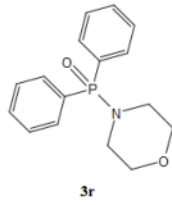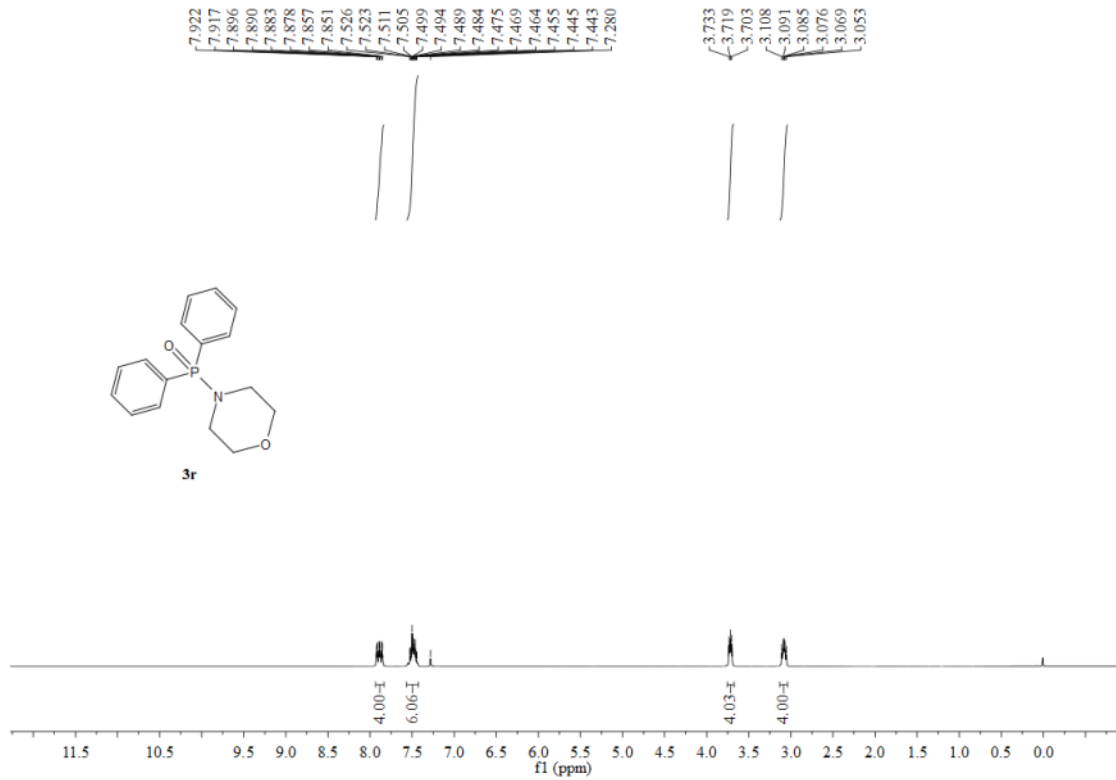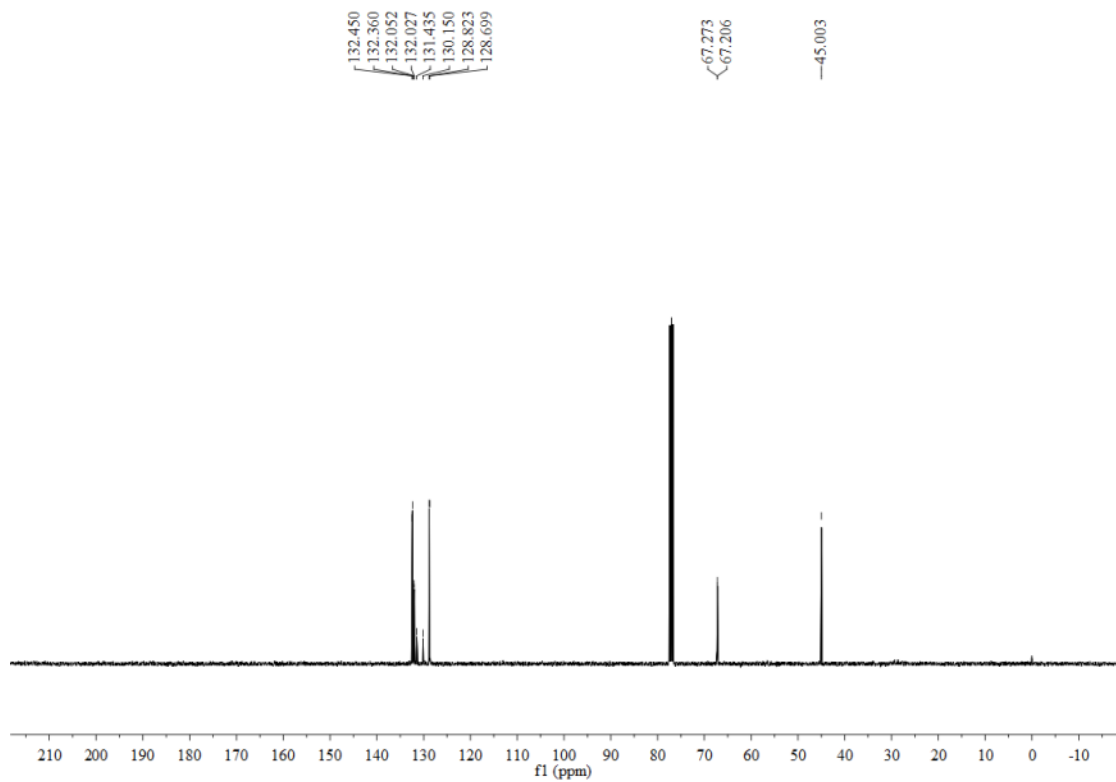

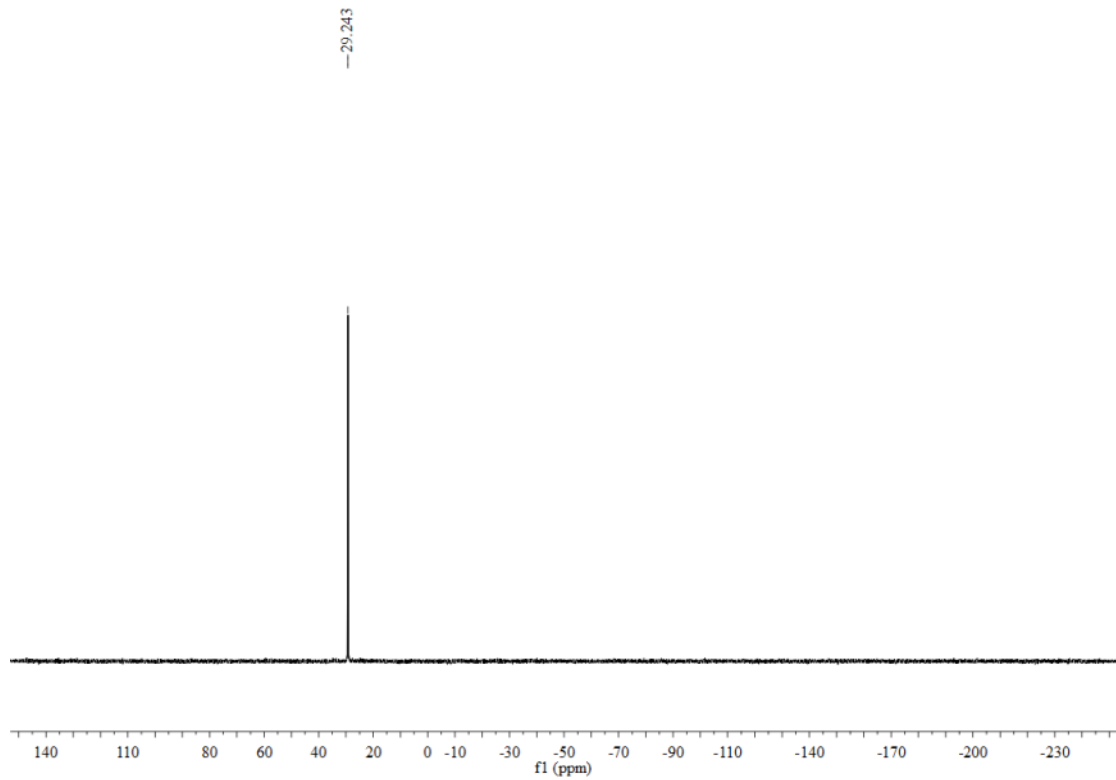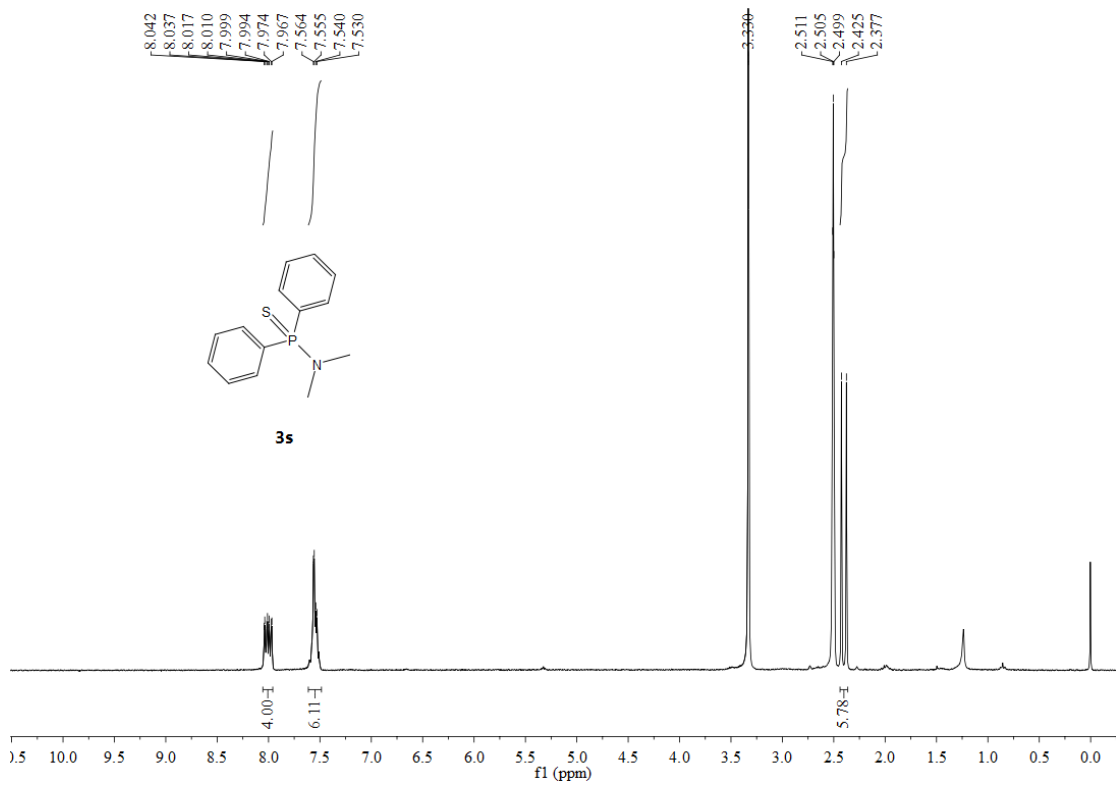

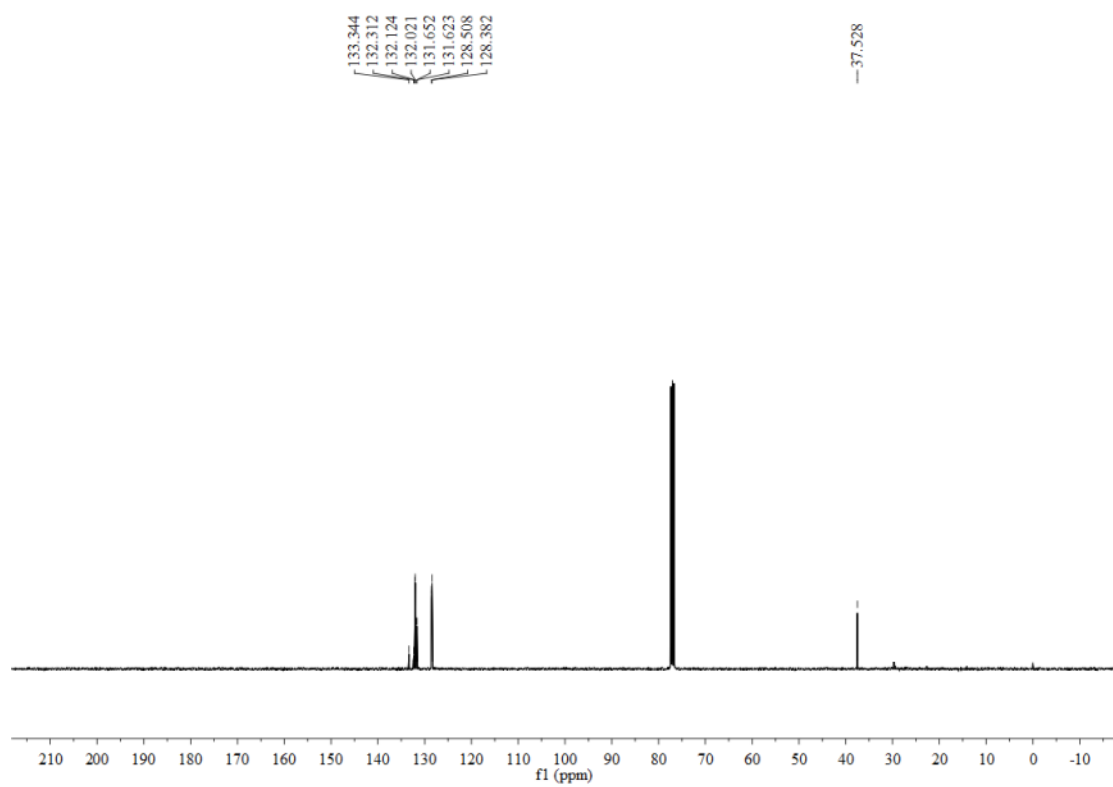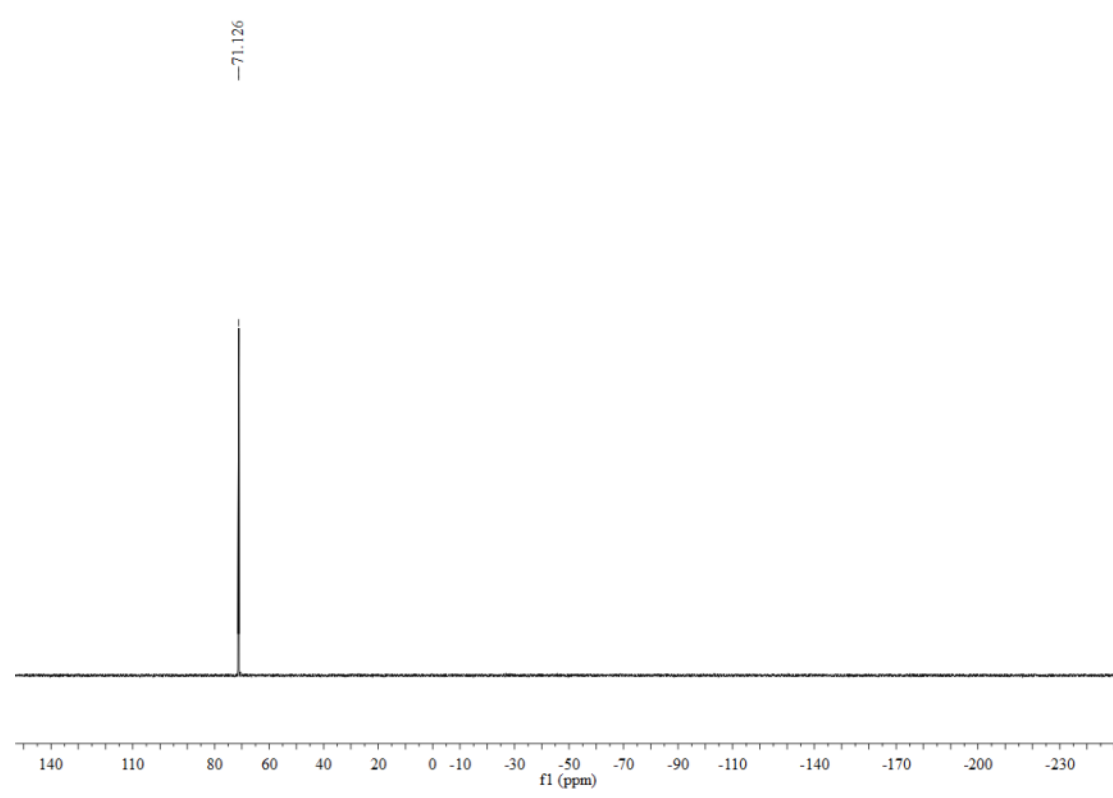

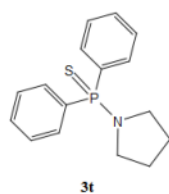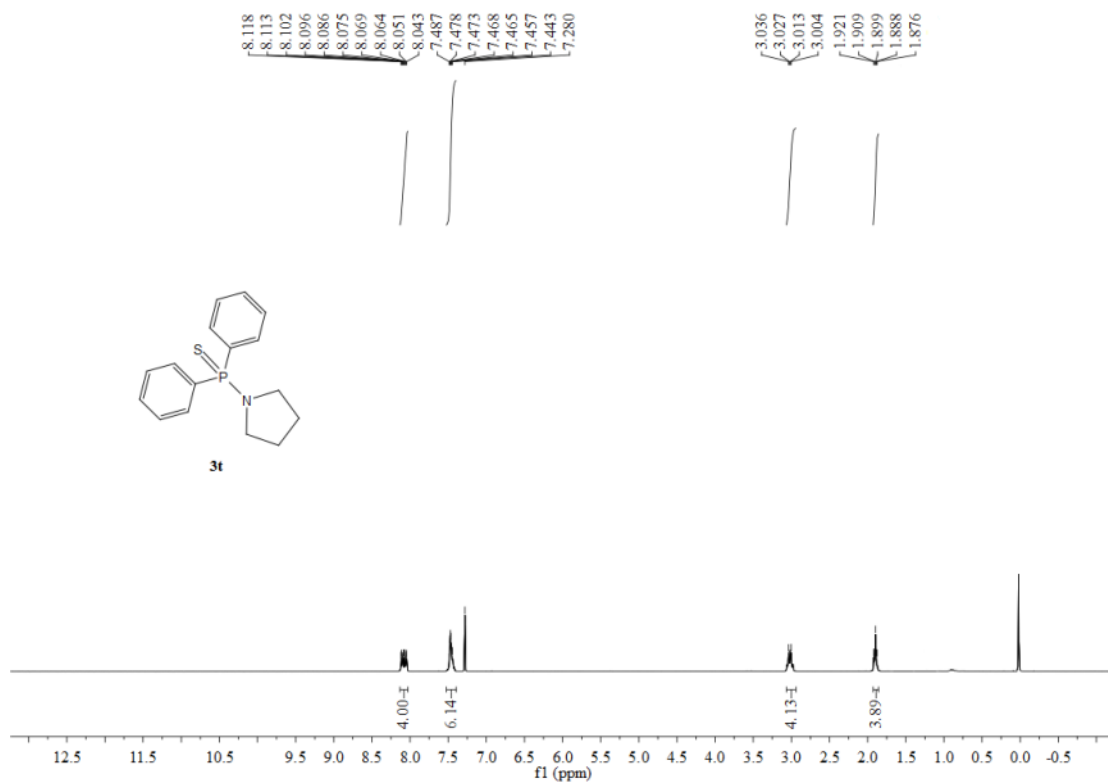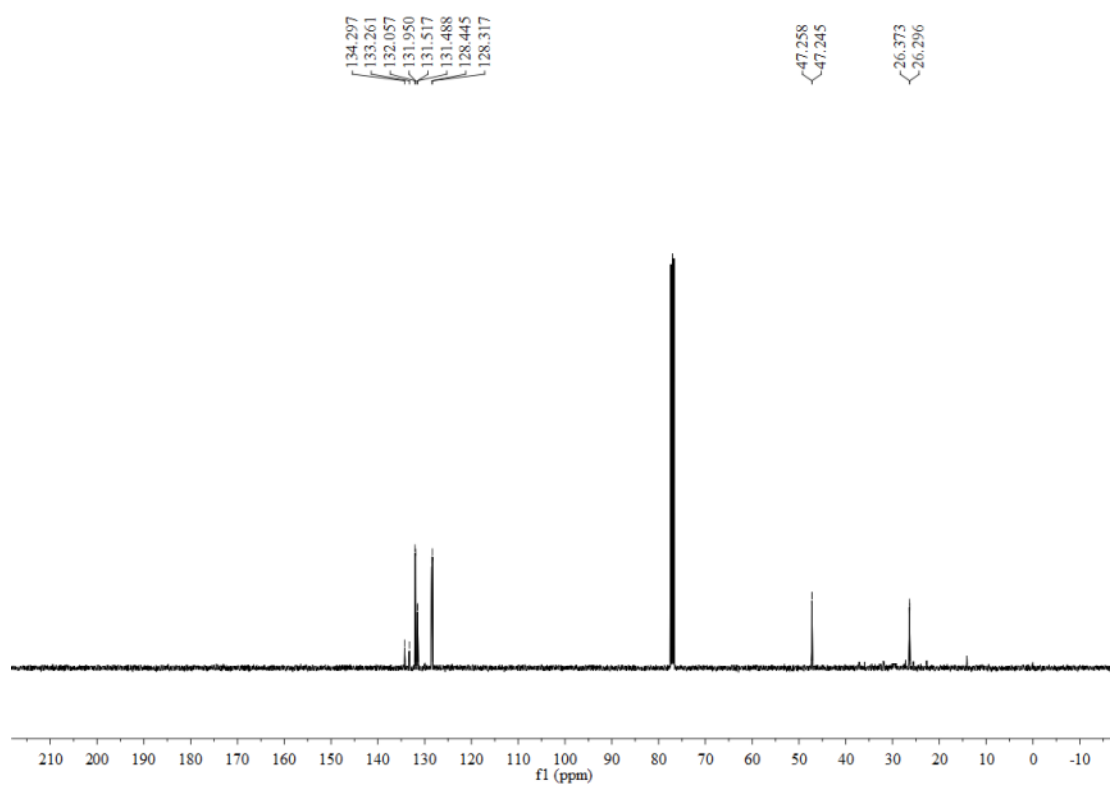

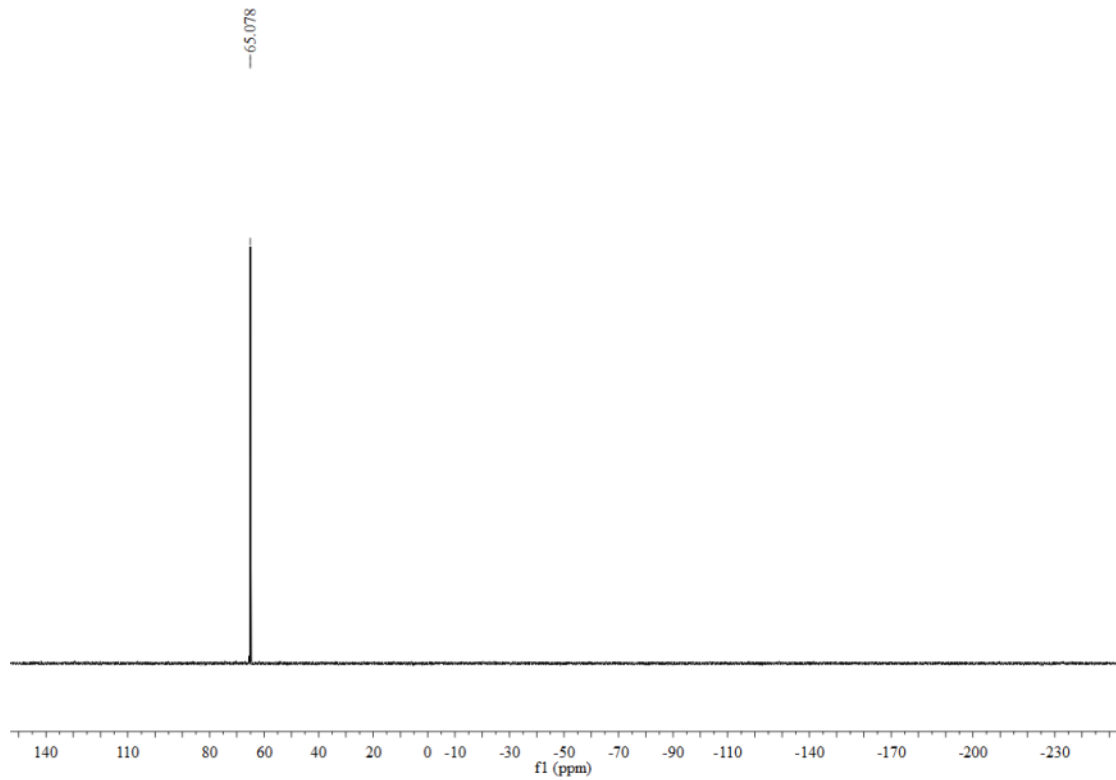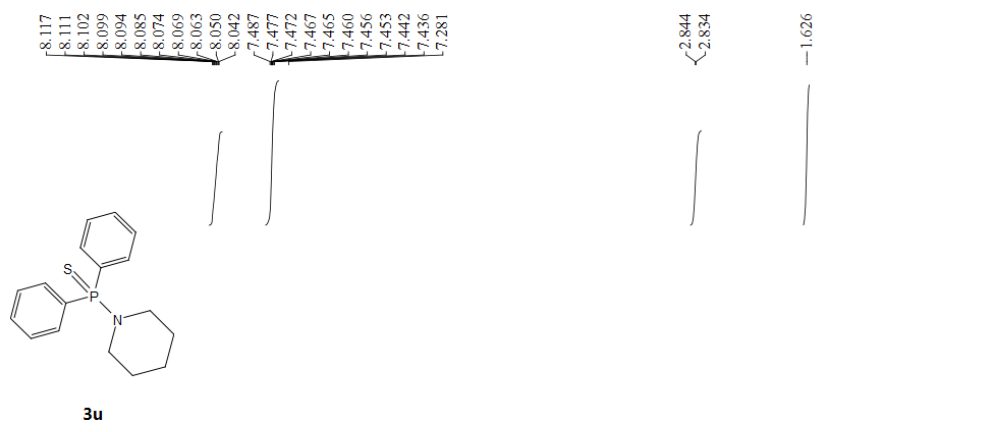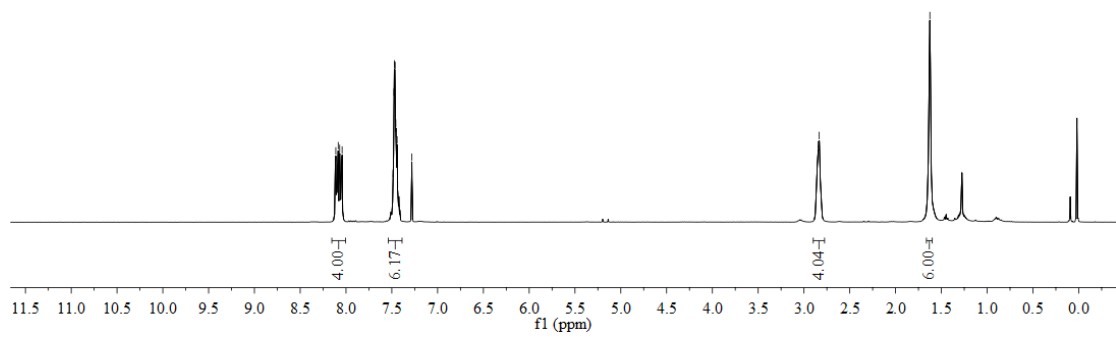



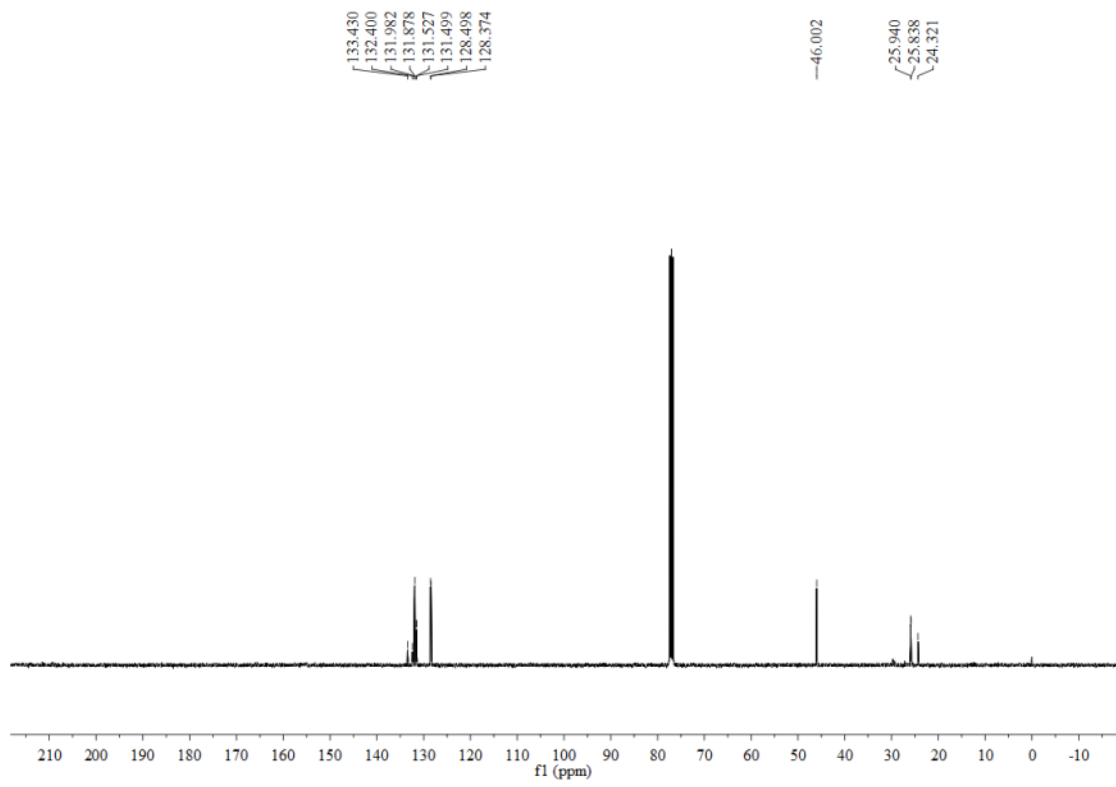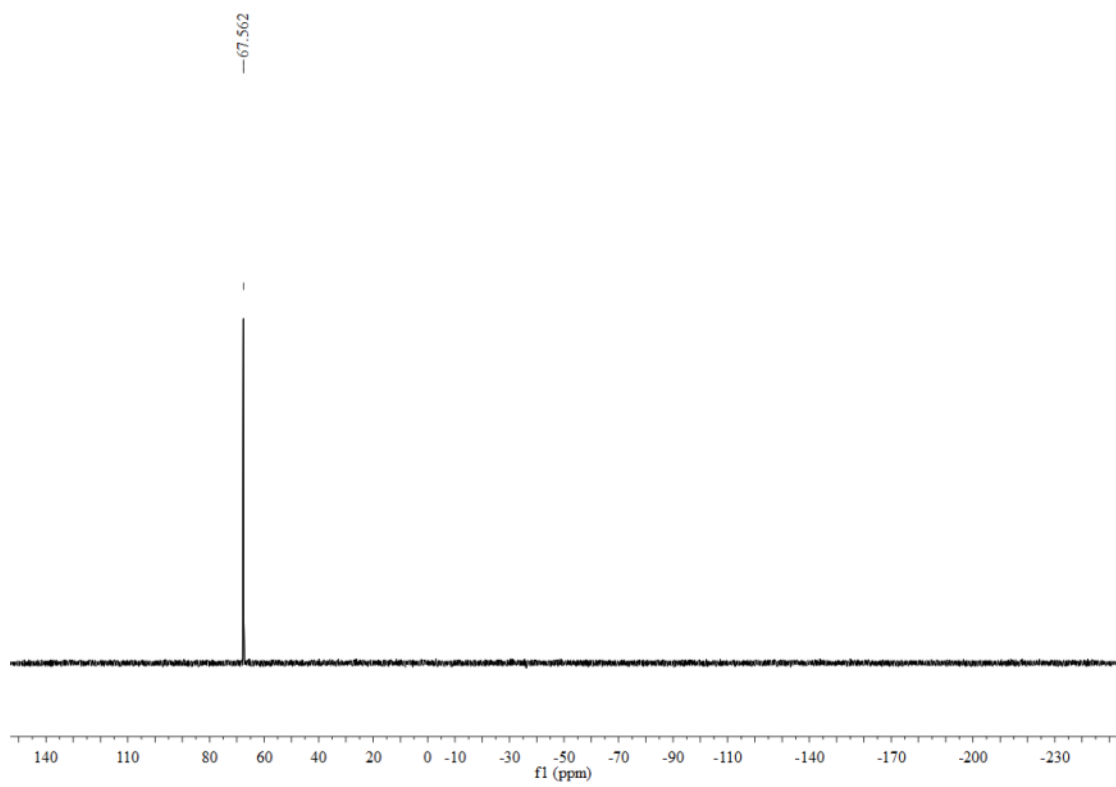

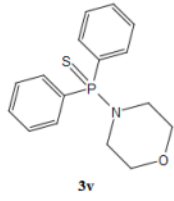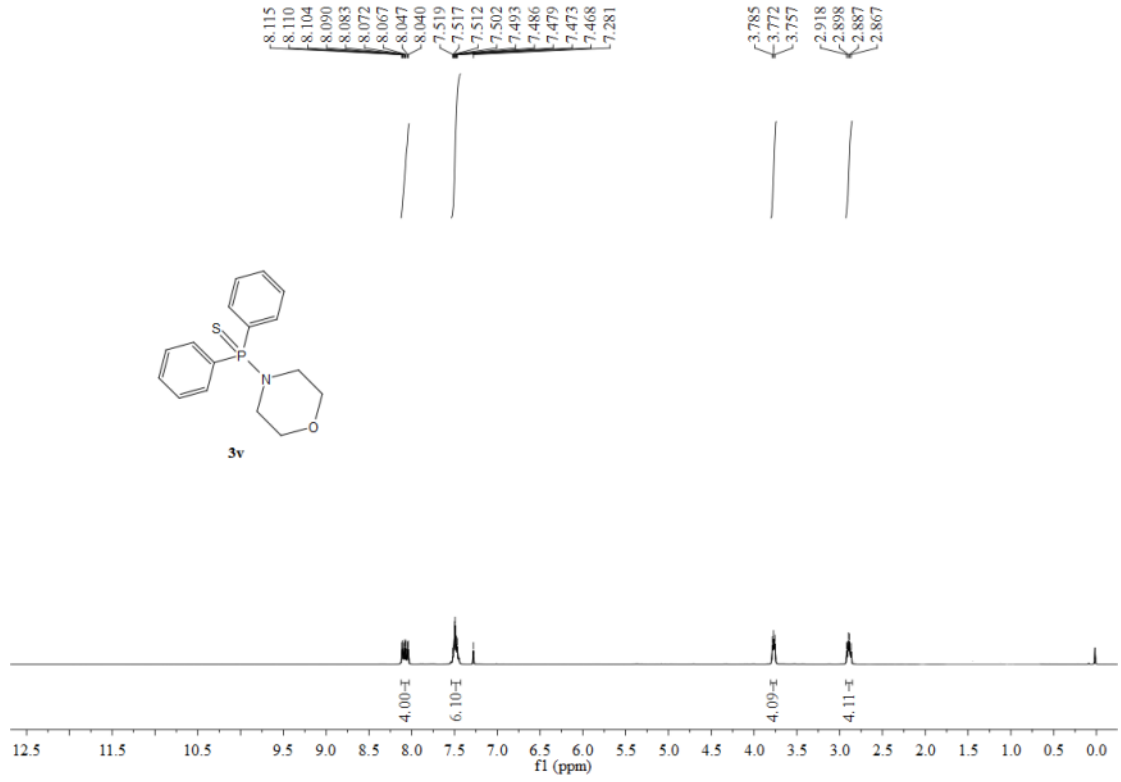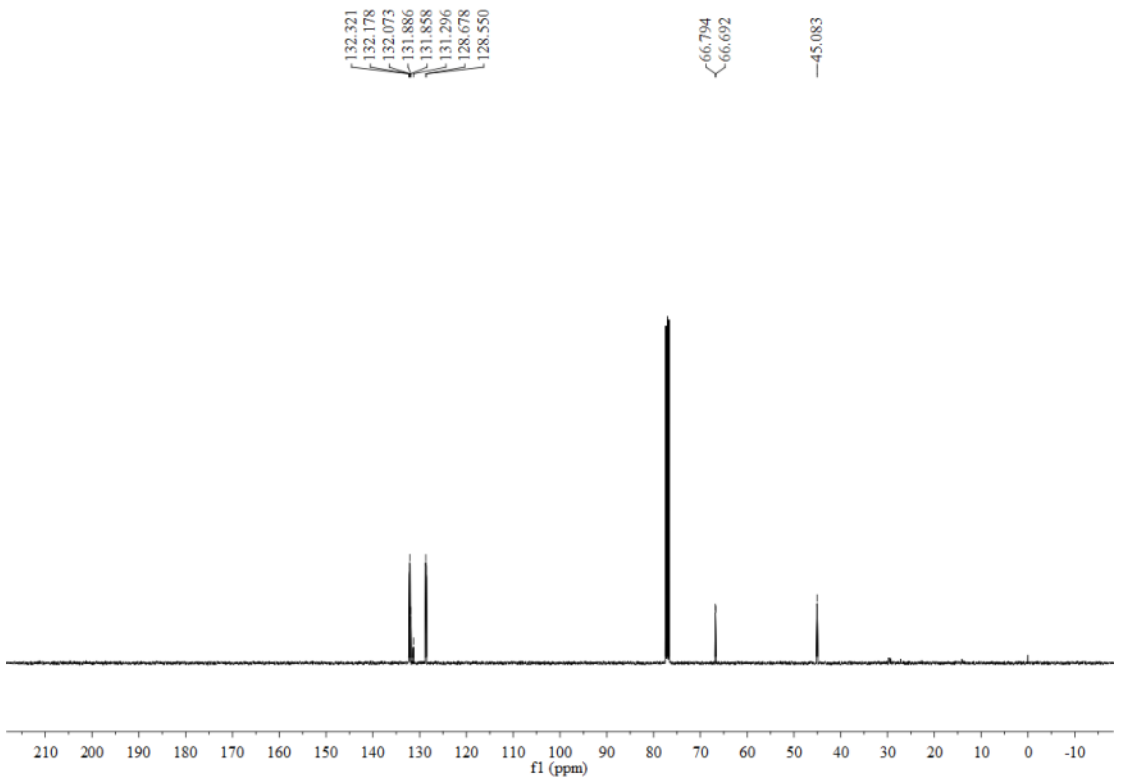

-67.595

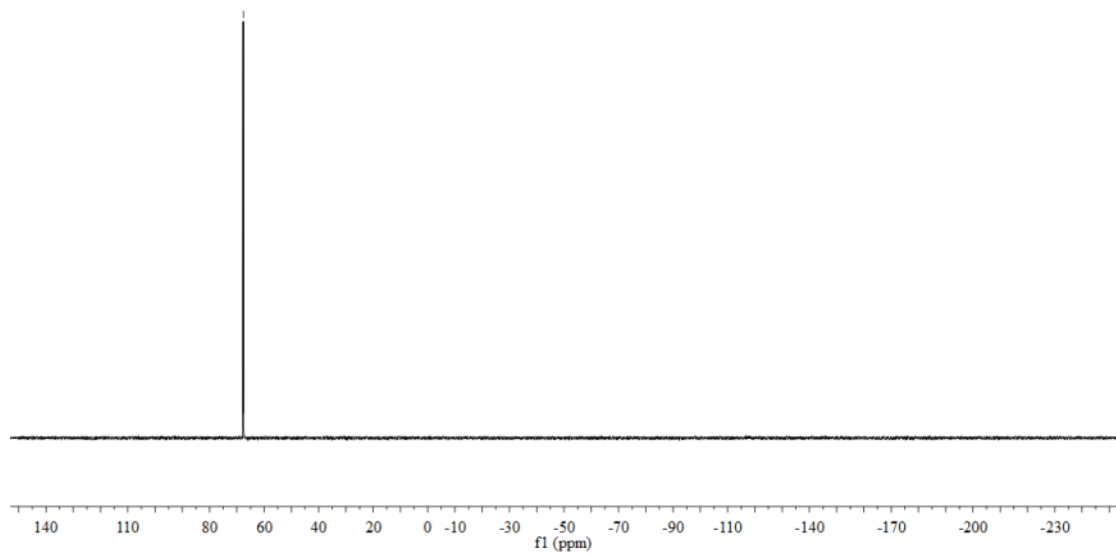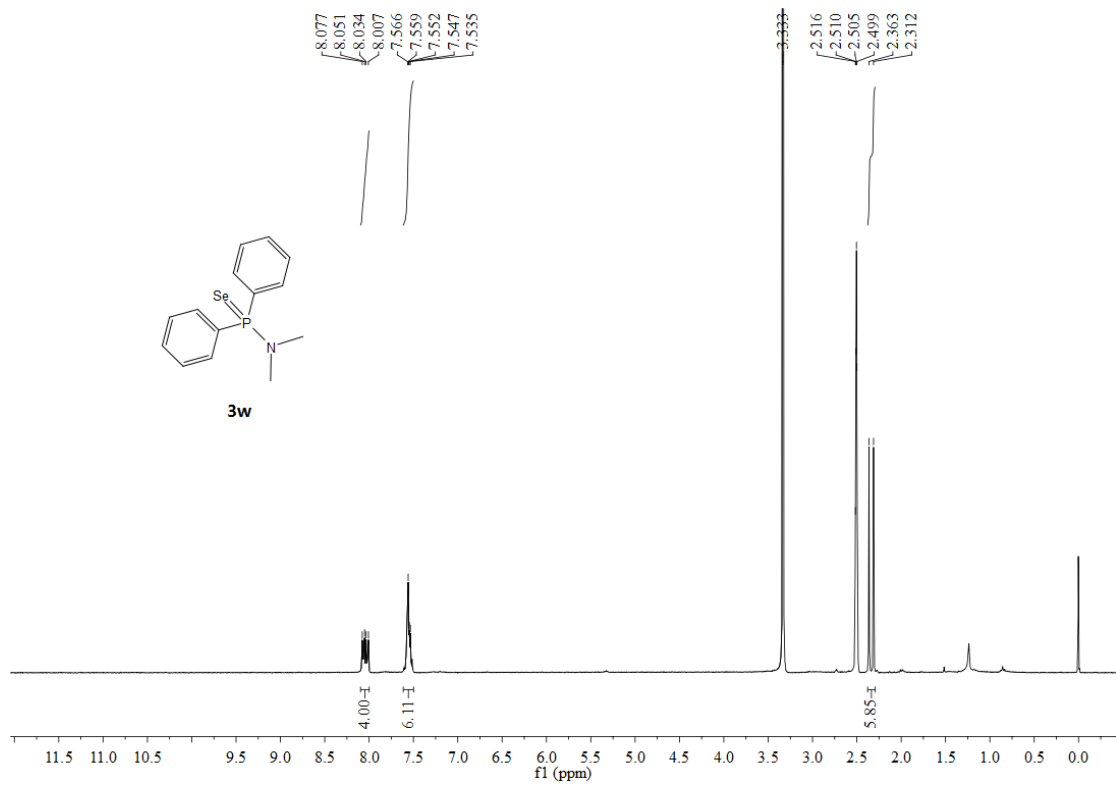

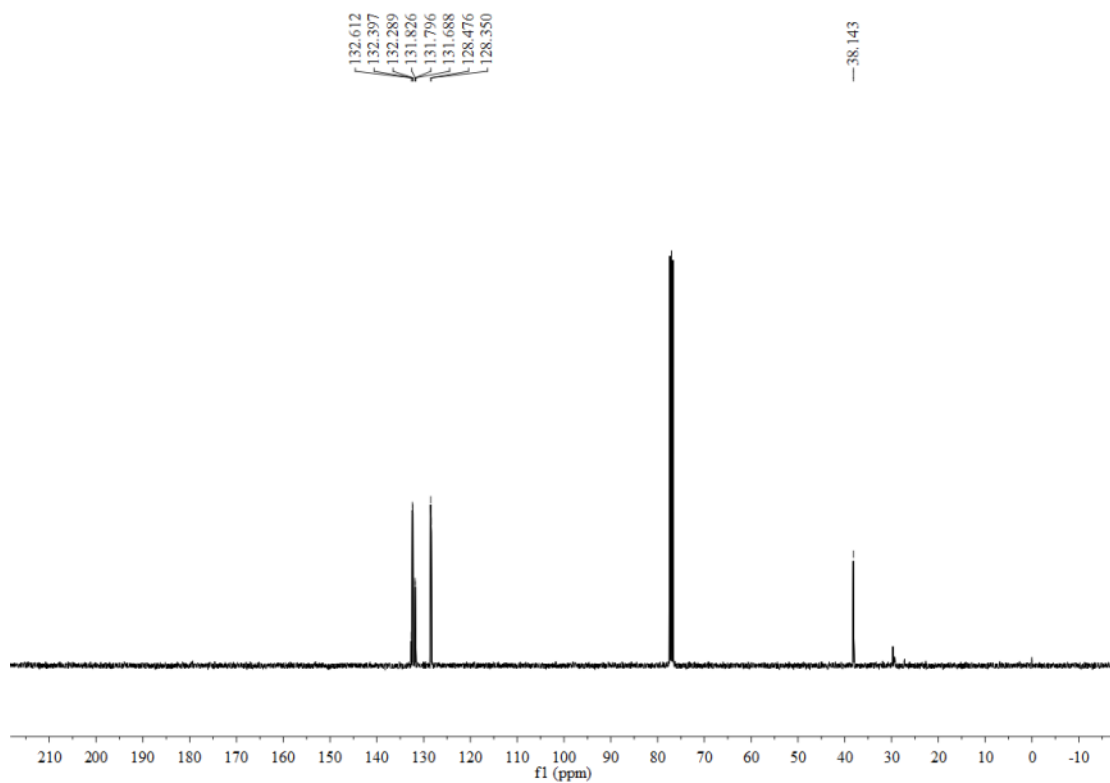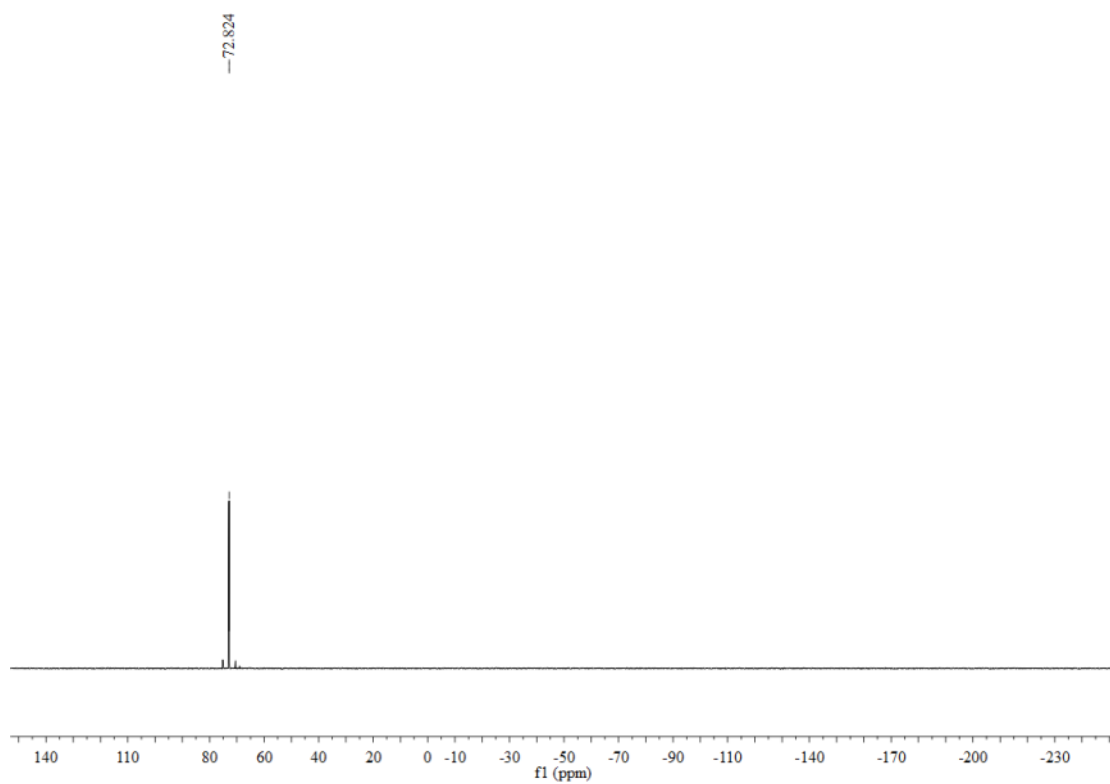

8.132  
8.127  
8.117  
8.109  
8.100  
8.088  
8.083  
8.077  
8.065  
8.057  
7.885  
7.476  
7.471  
7.466  
7.455  
7.441  
7.423  
7.281

2.873  
2.849  
2.825  
2.820  
2.796  
2.772  
2.510  
2.459

1.195  
1.171  
1.148

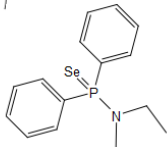

**3x**

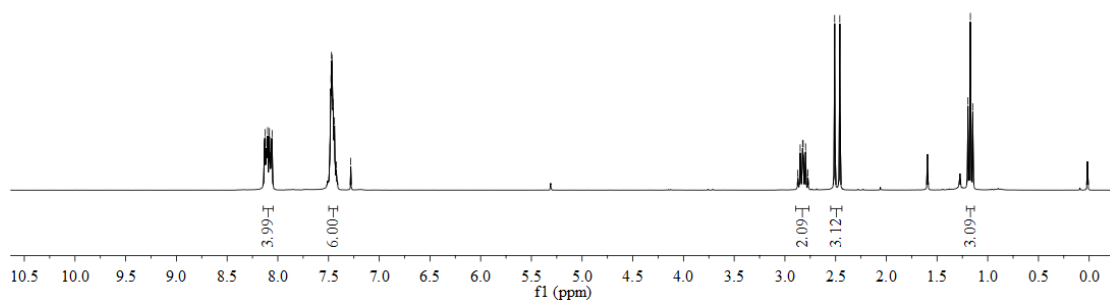

133.063  
132.326  
132.218  
132.141  
131.728  
131.699  
128.439  
128.311

44.969

34.066

12.880  
12.789

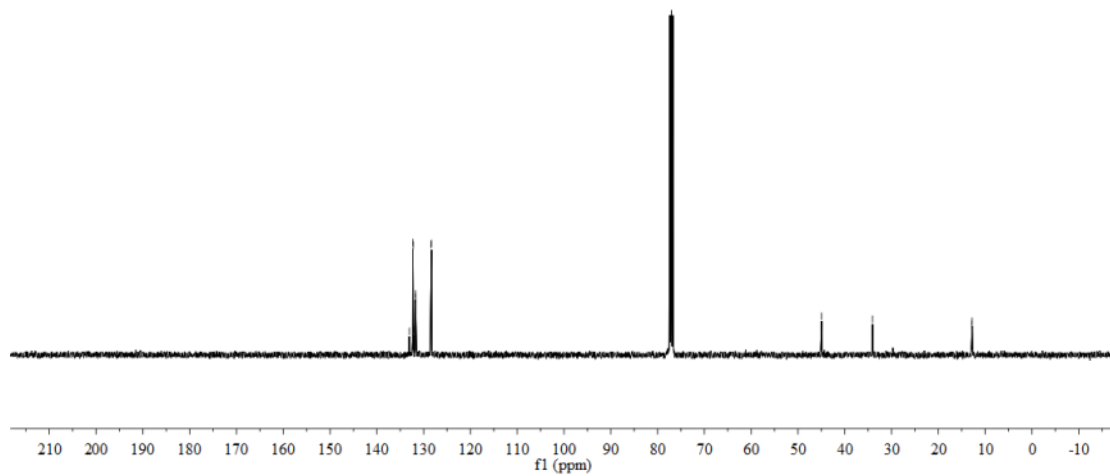

-71.166

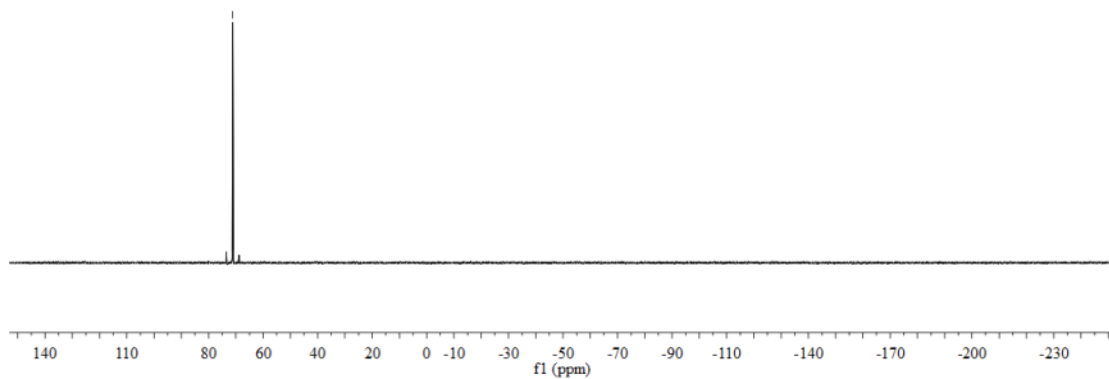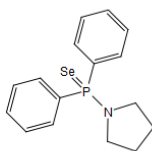

3y

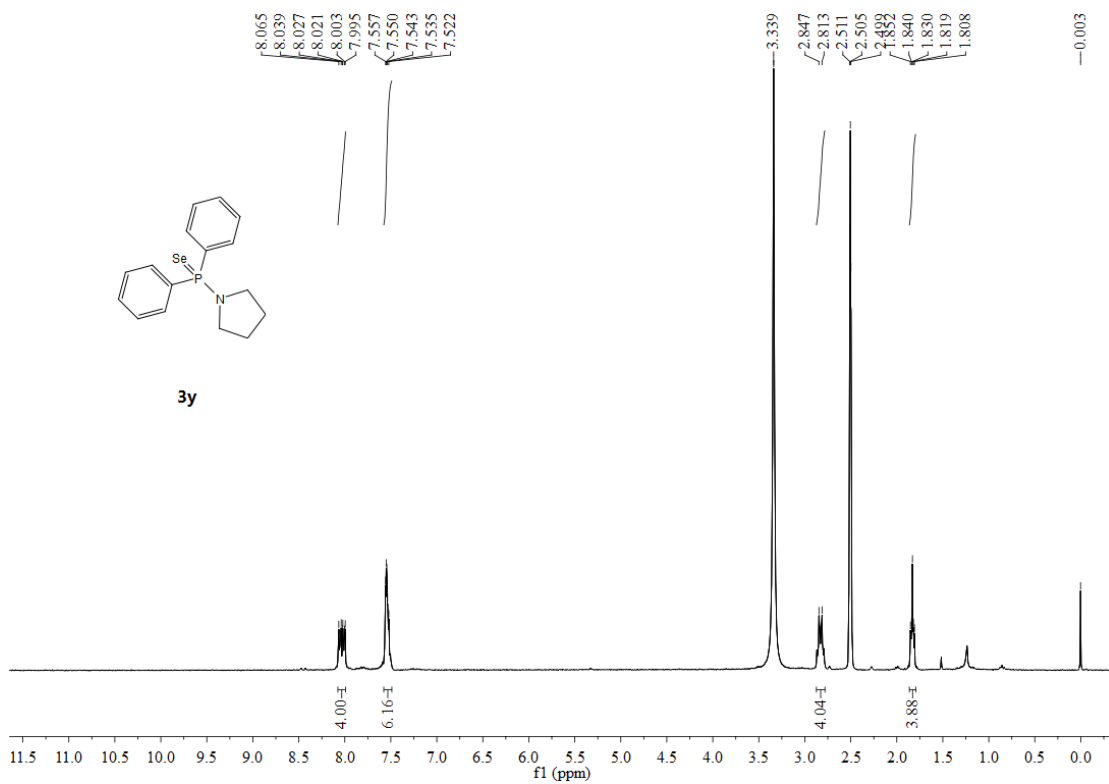

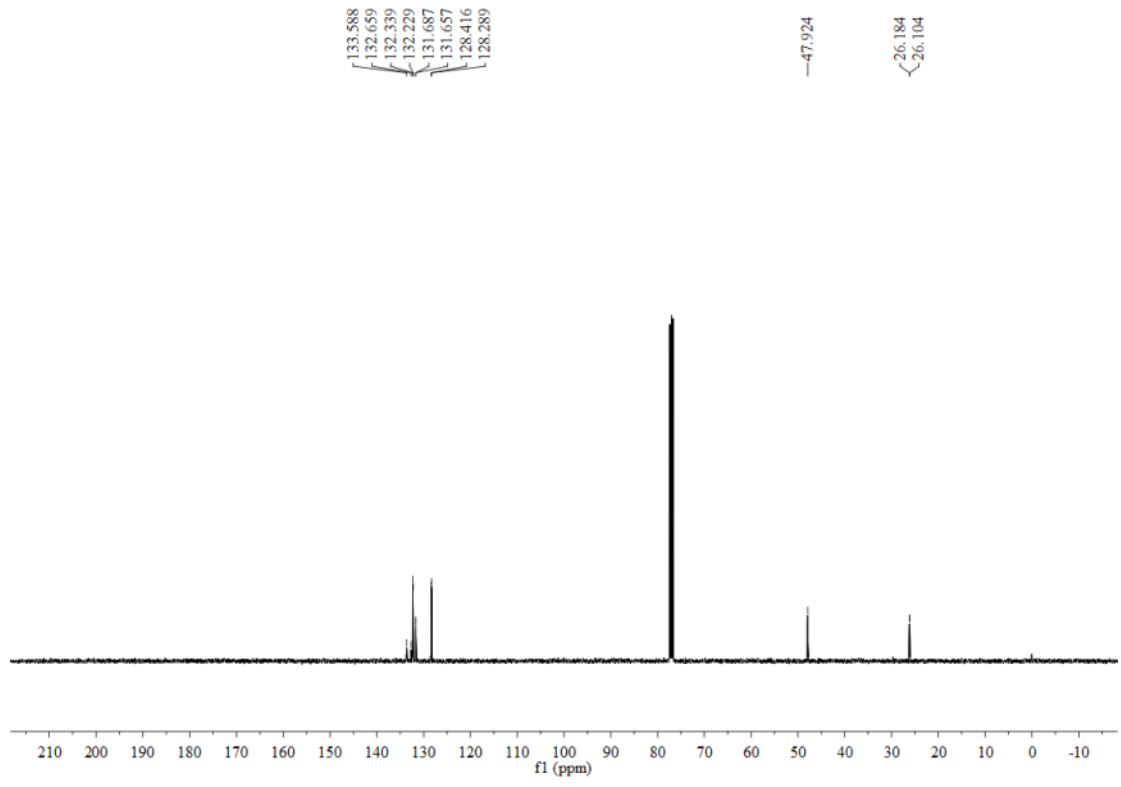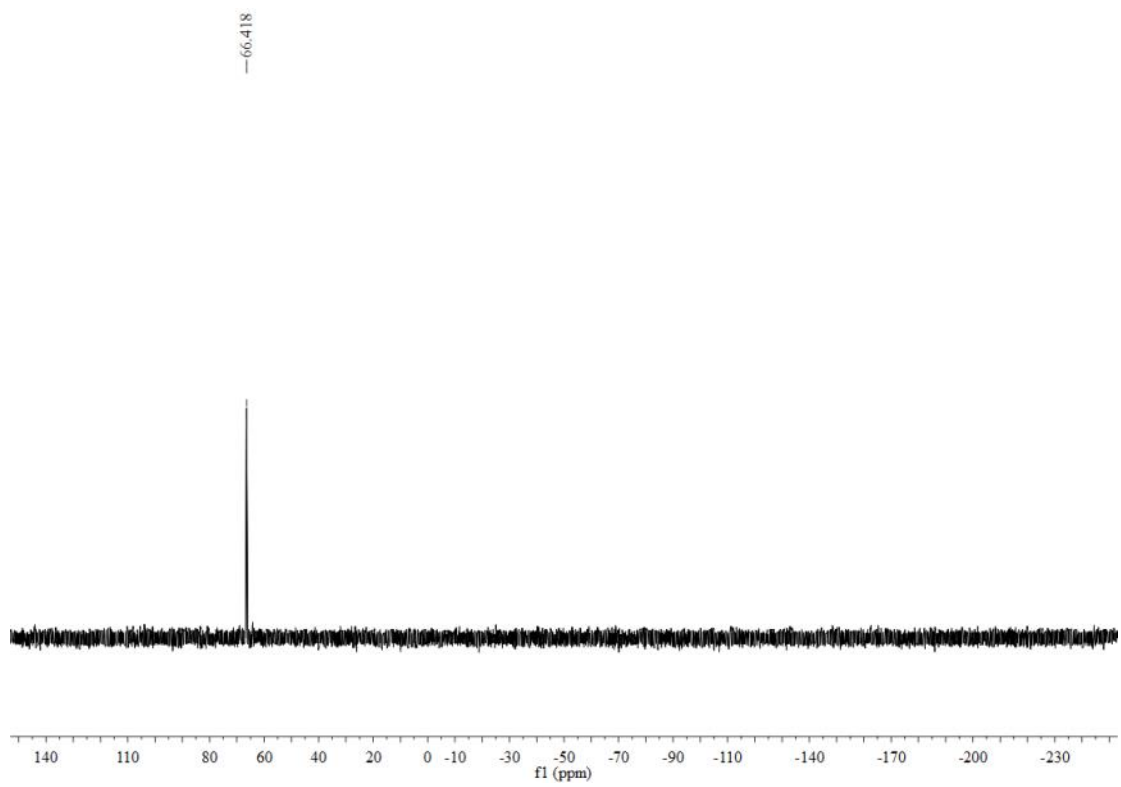

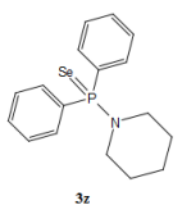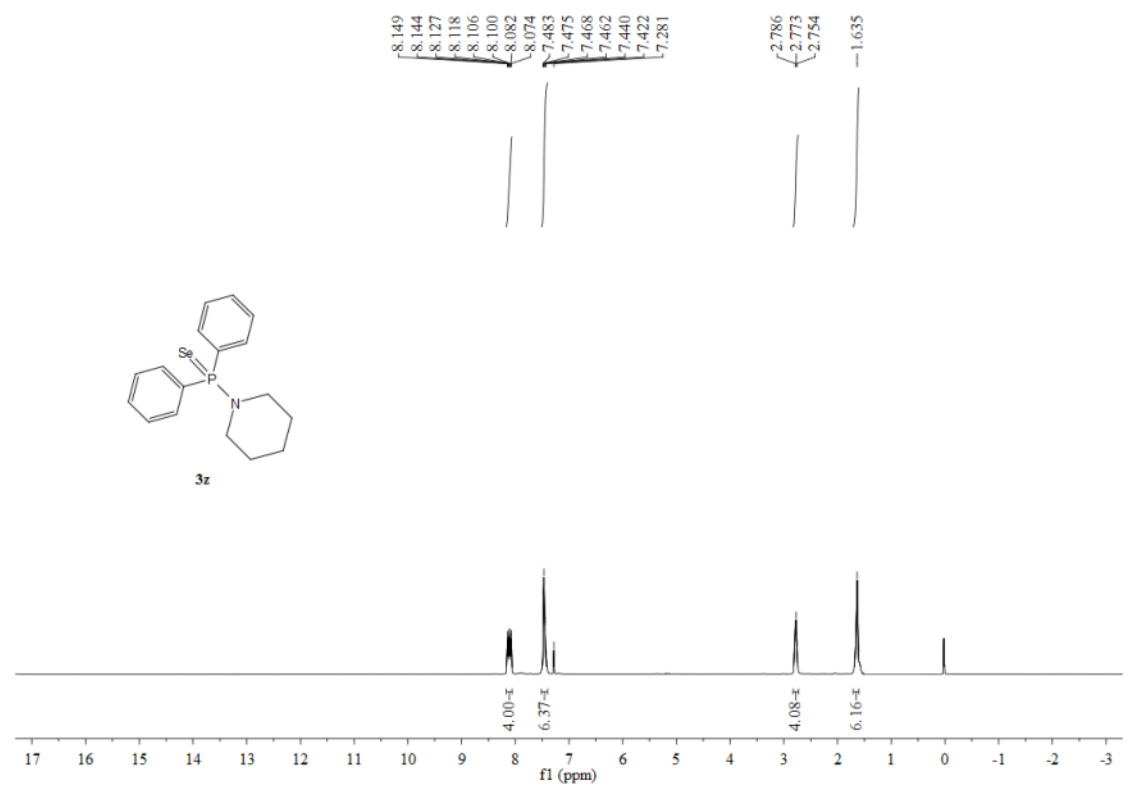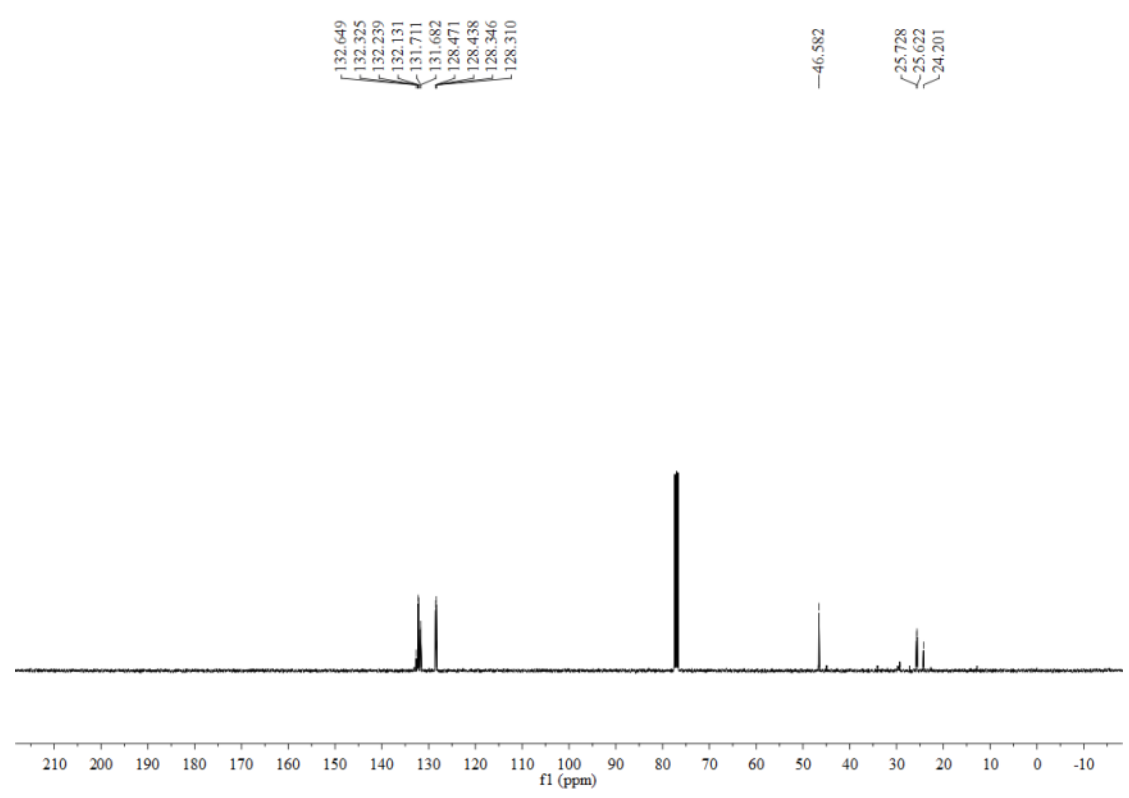



-68.215

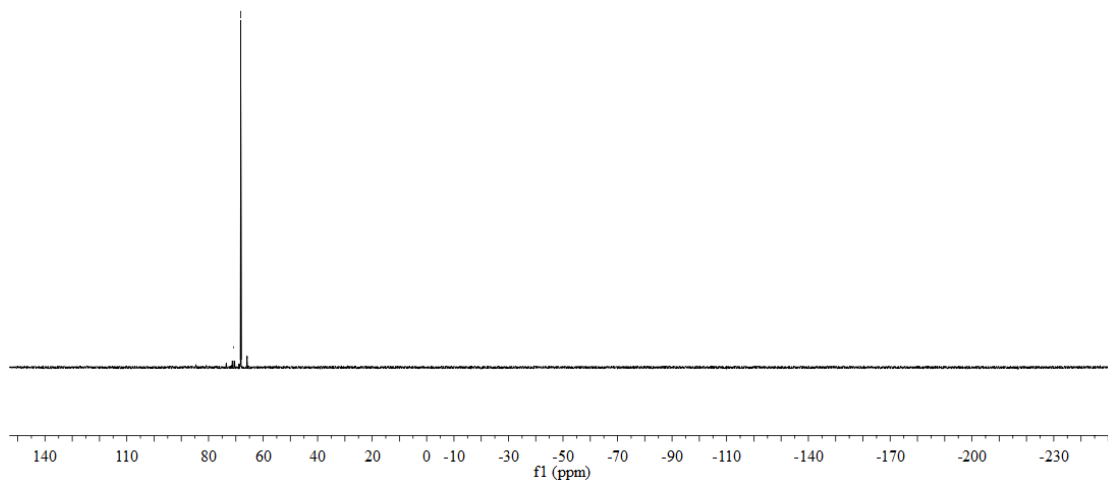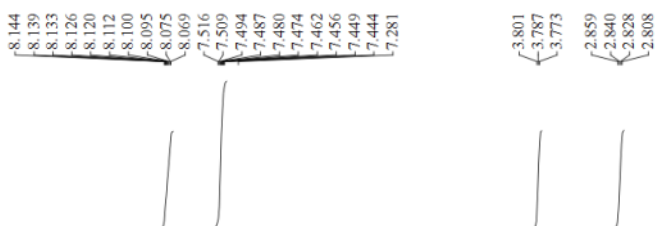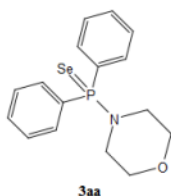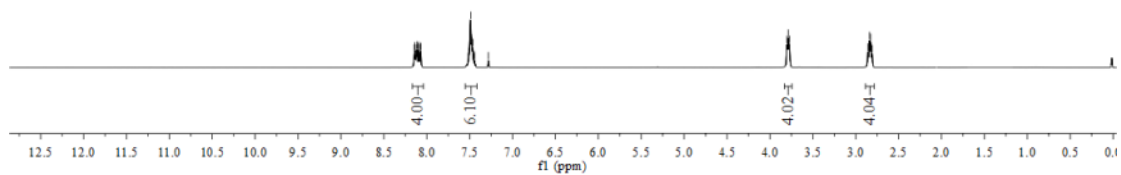

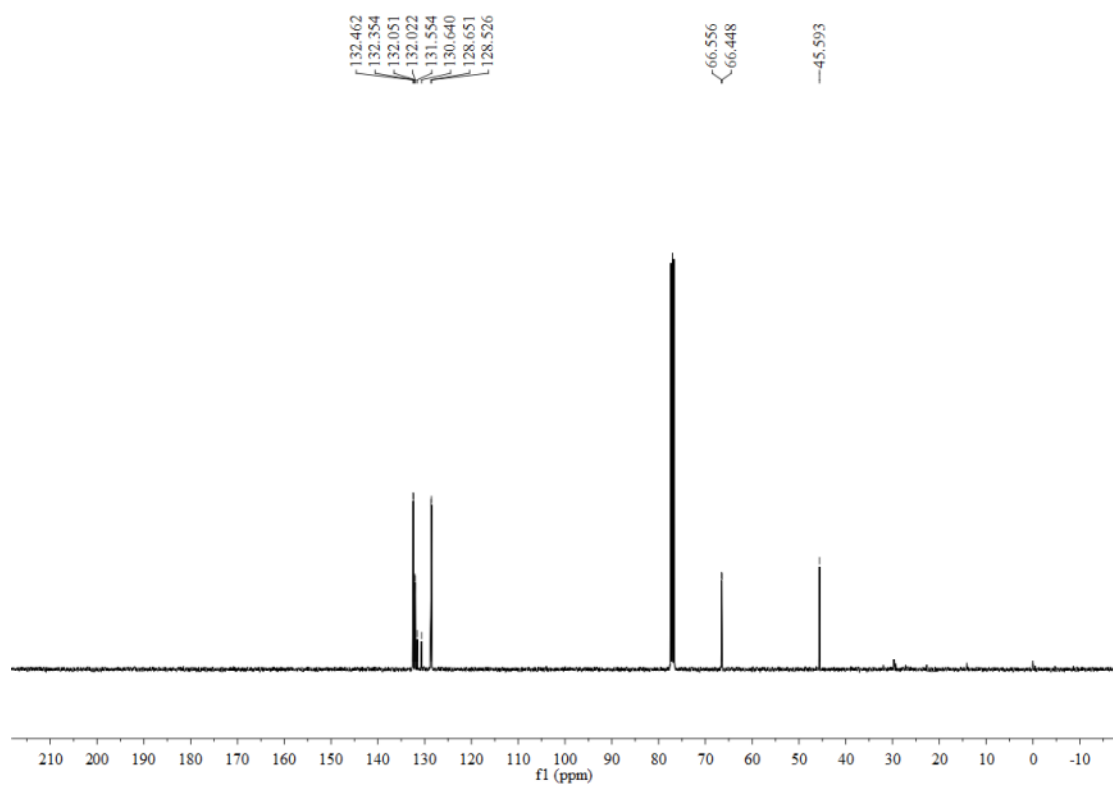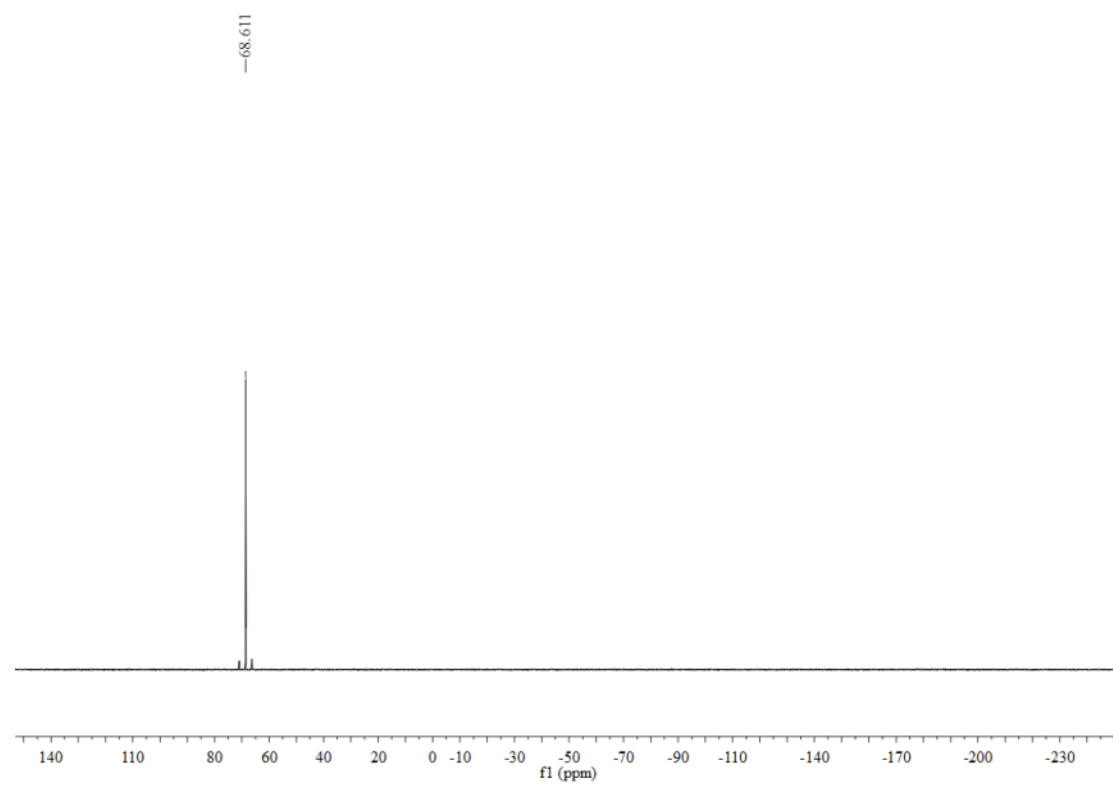

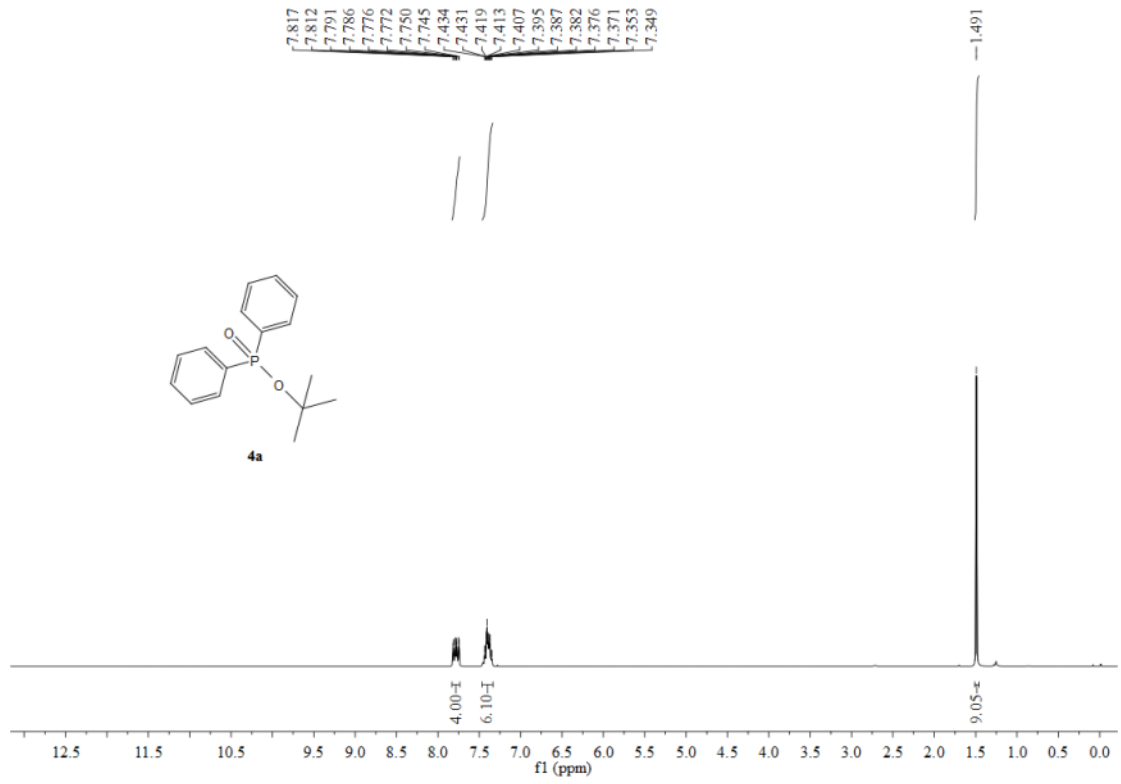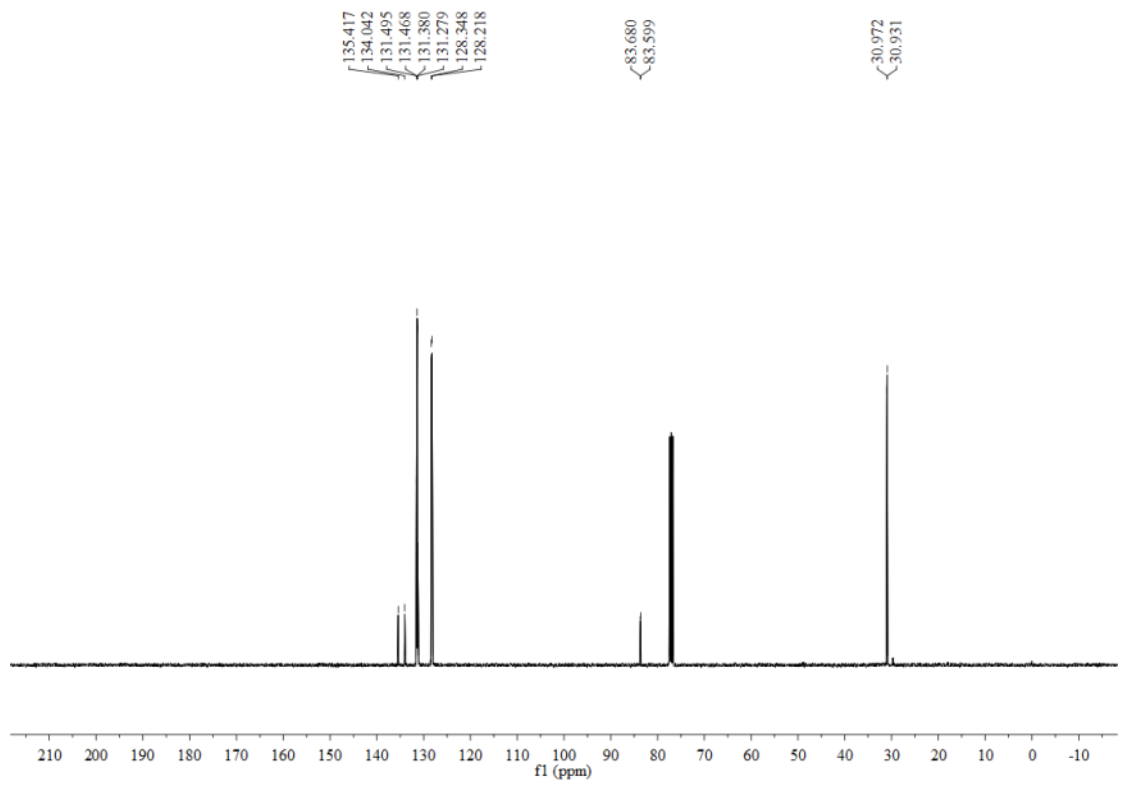

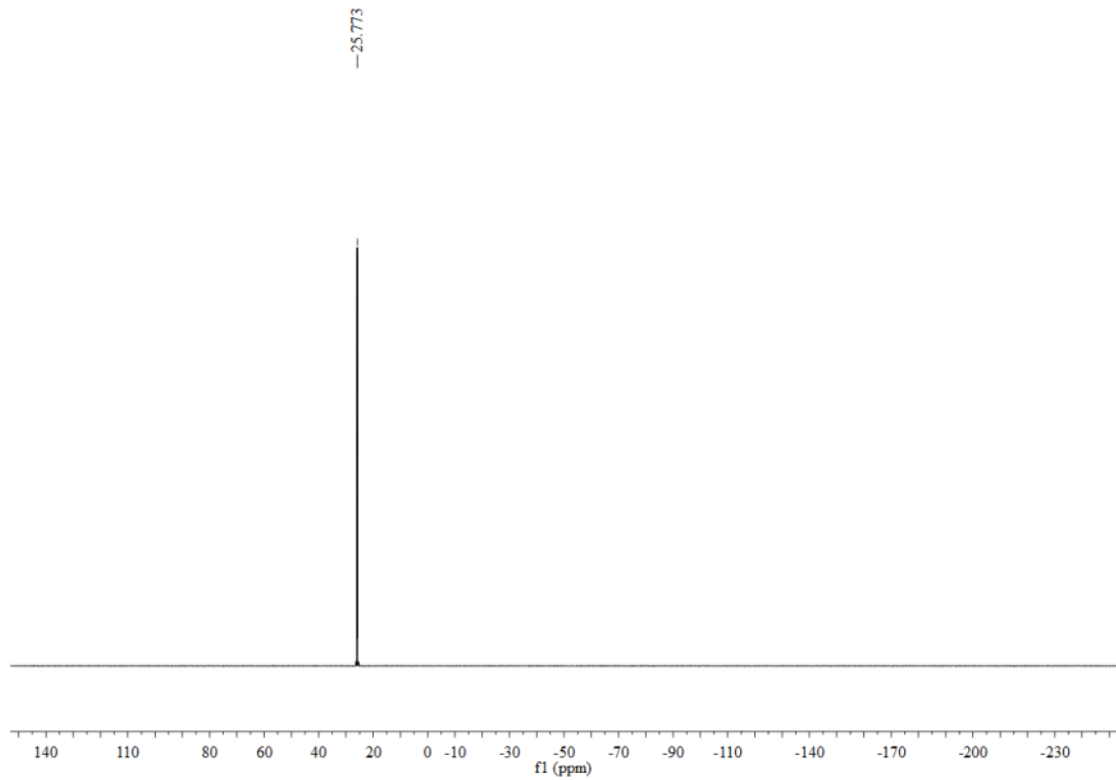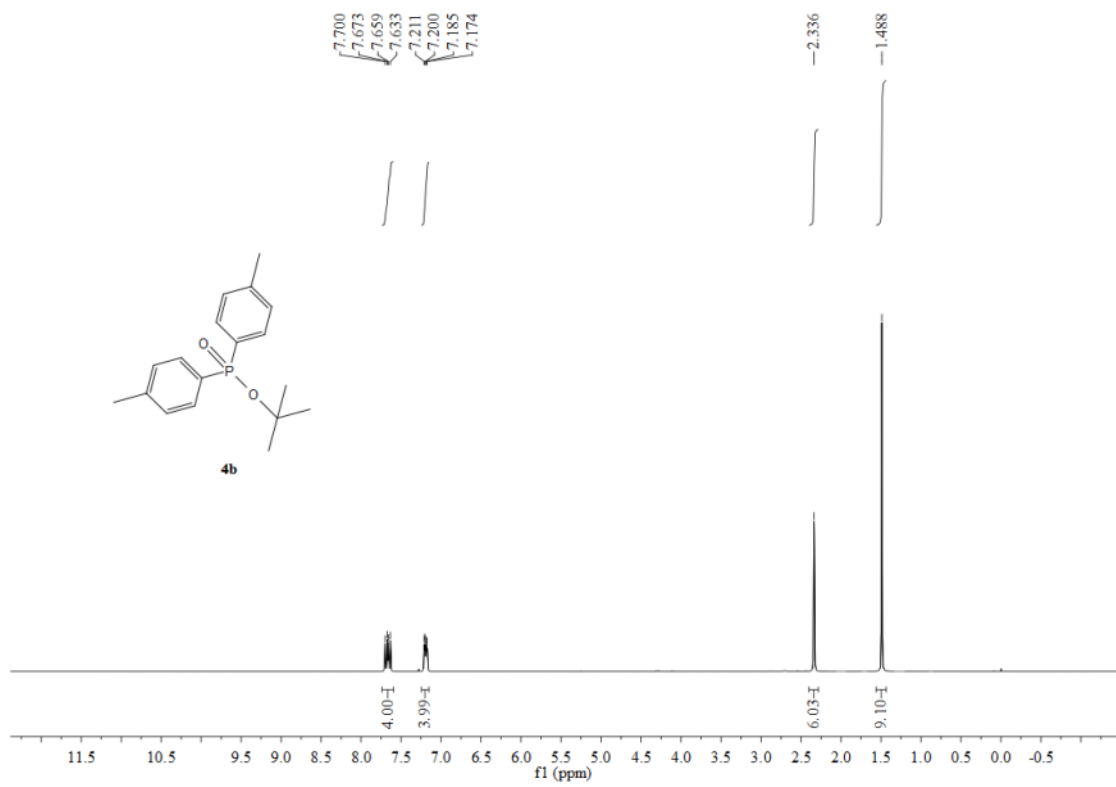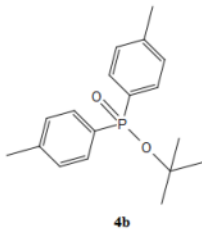

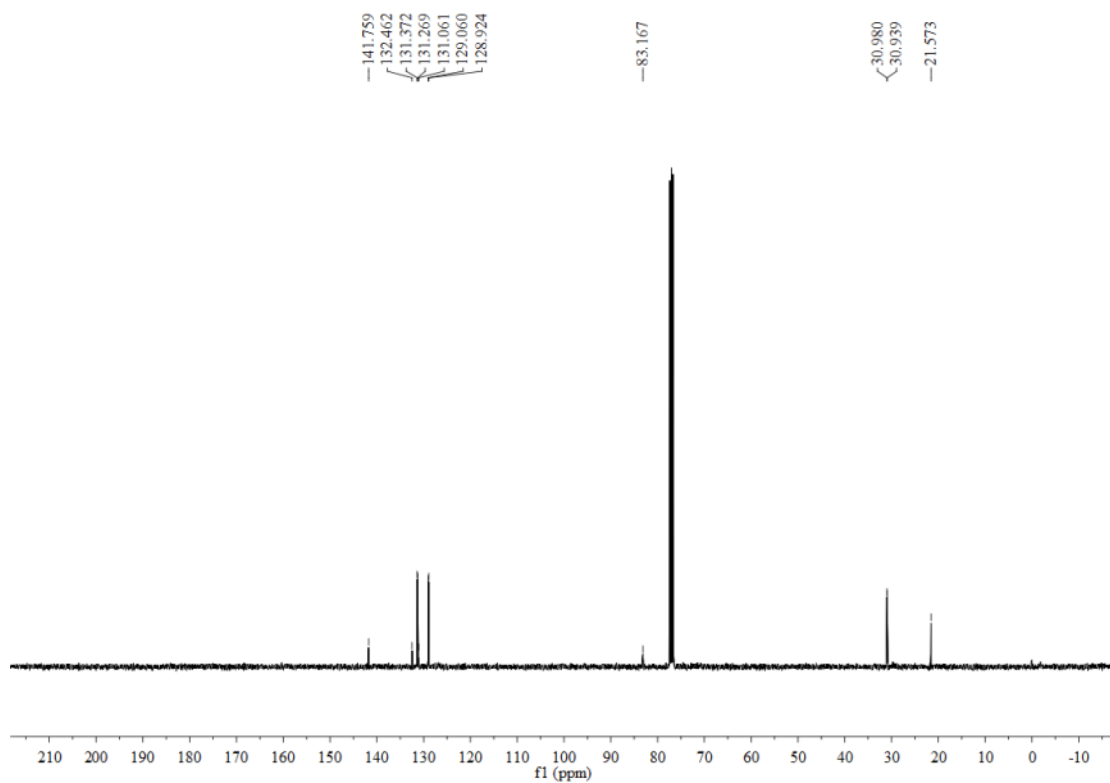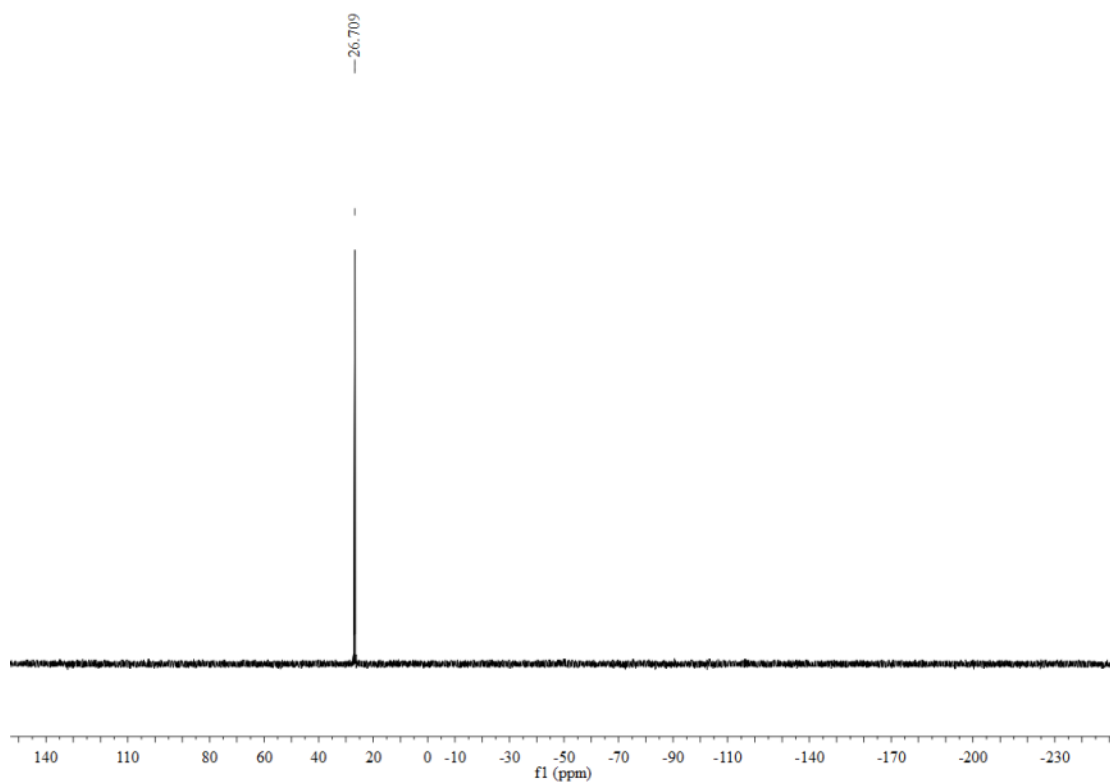

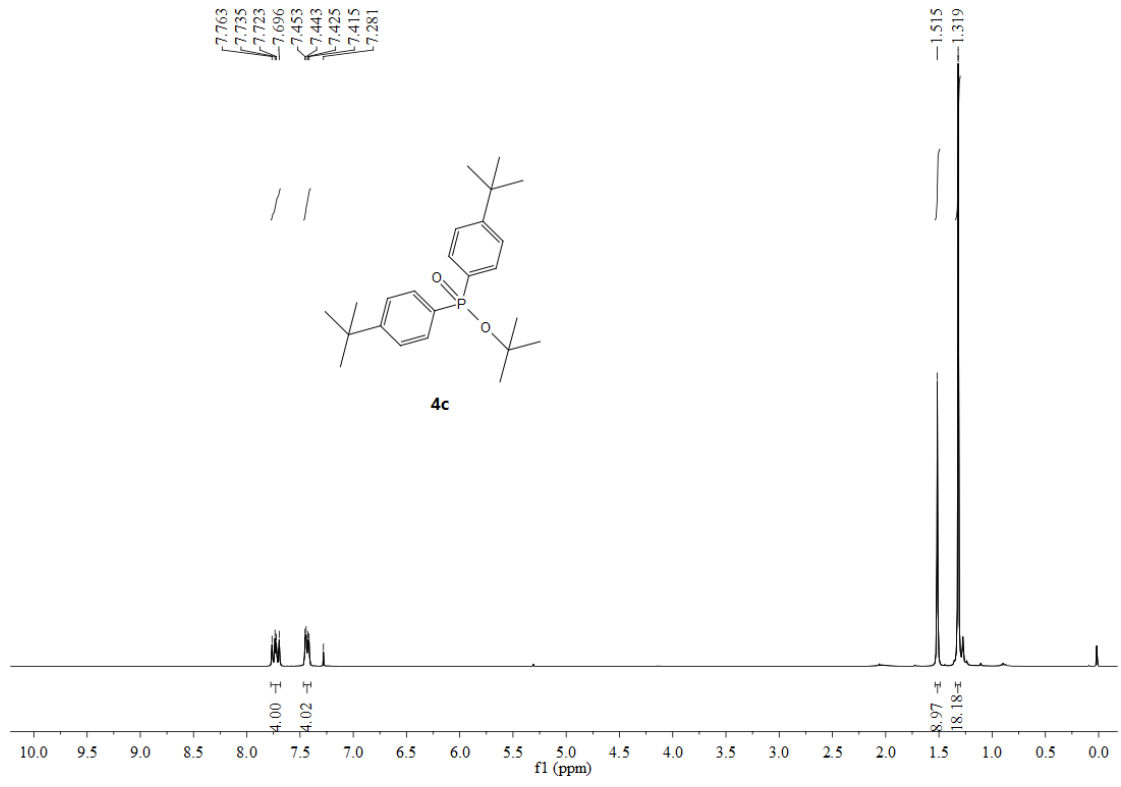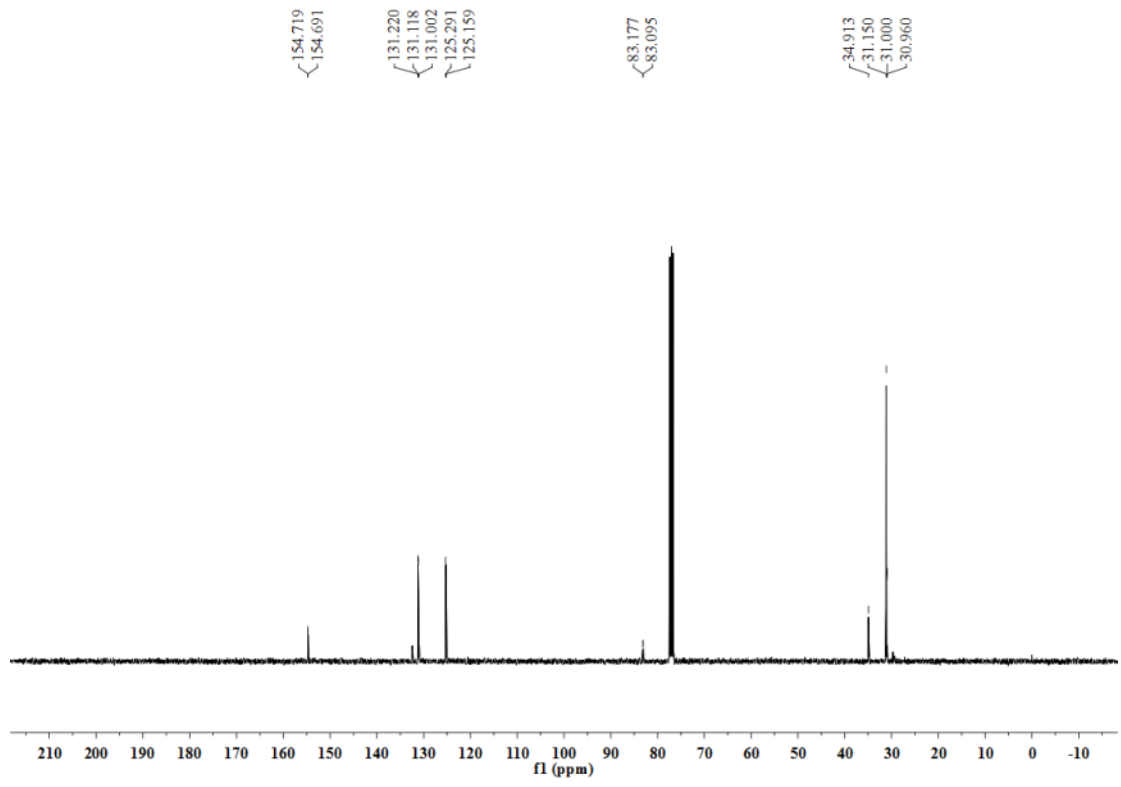

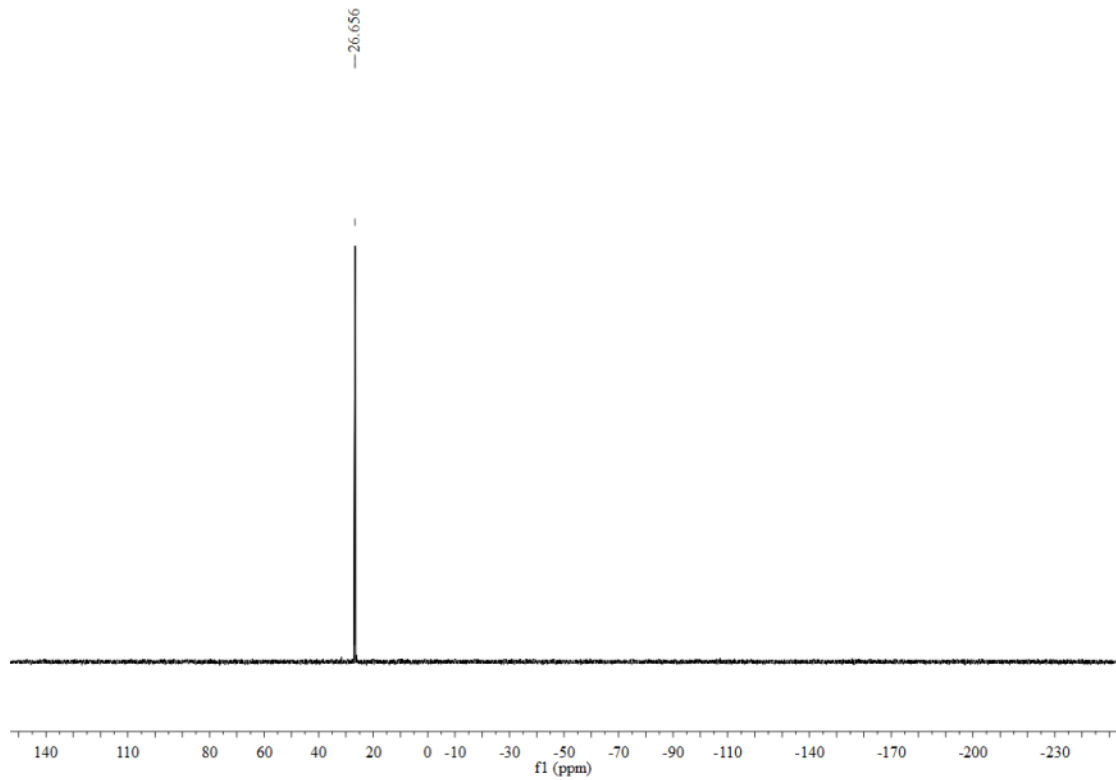

7.805  
7.786  
7.776  
7.765  
7.757  
7.747  
7.736  
7.718  
7.121  
7.112  
7.091  
7.083  
7.062  
7.053

1.487

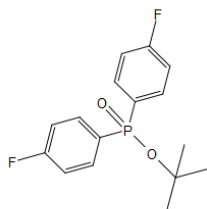

4d

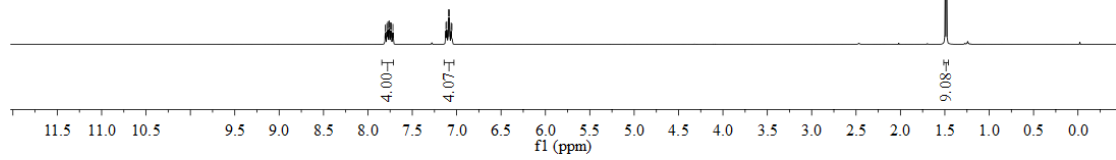

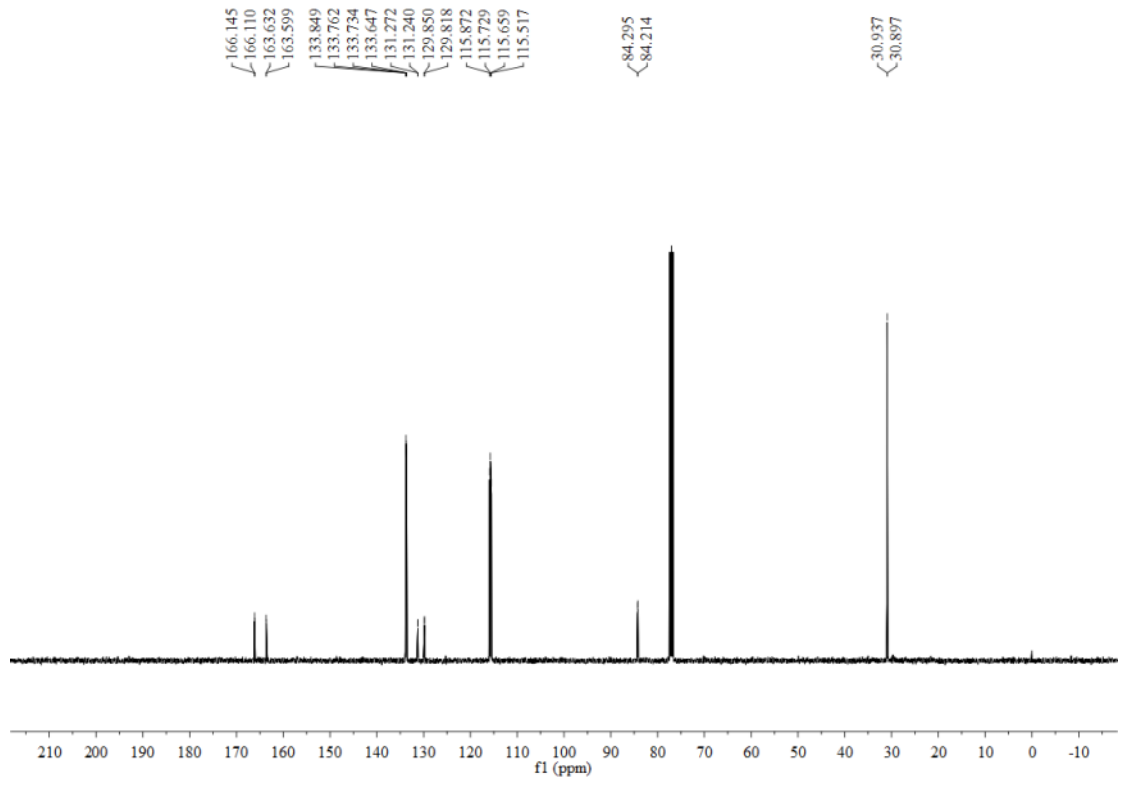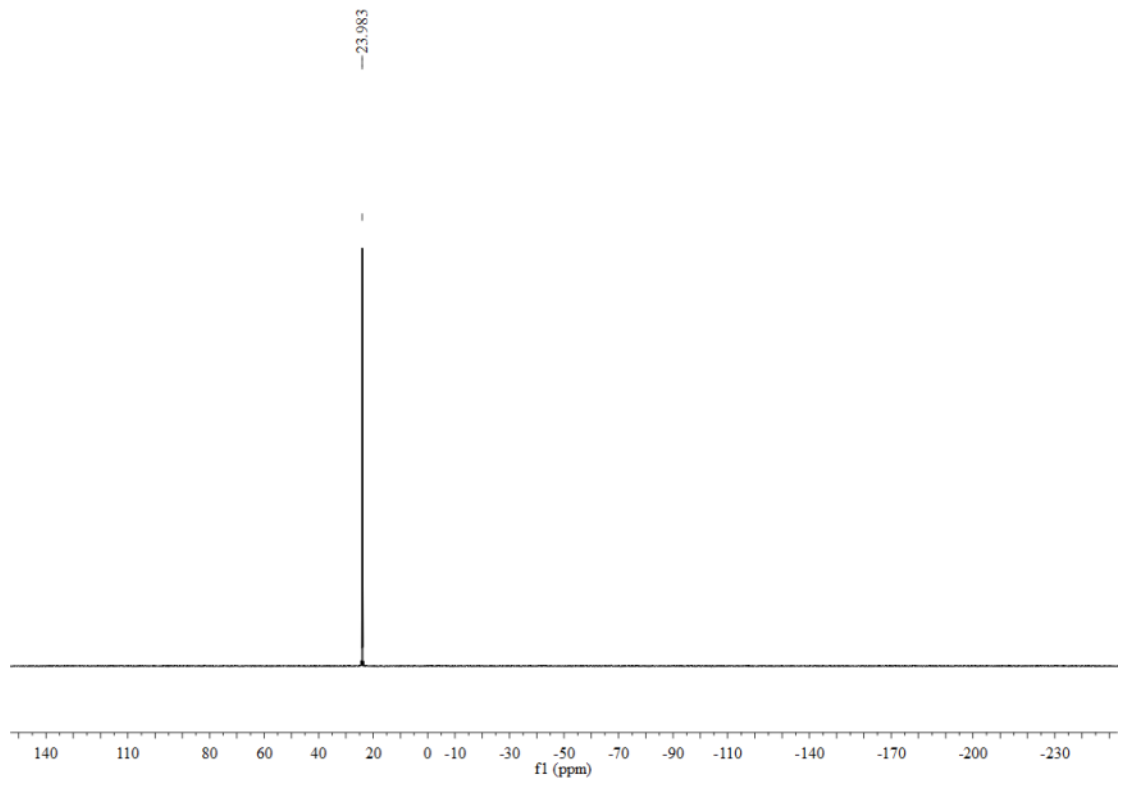



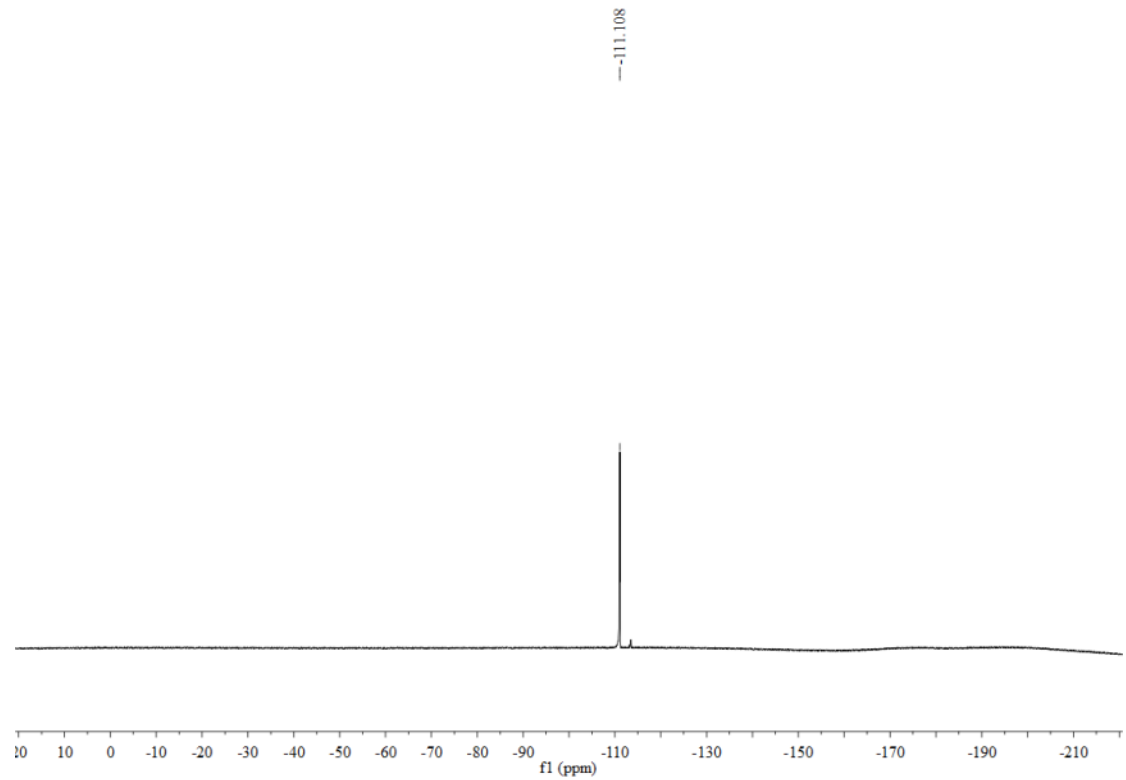

7.742  
7.736  
7.720  
7.714  
7.703  
7.696  
7.681  
7.674  
7.429  
7.420  
7.414  
7.407  
7.401  
7.391  
7.299

1.515

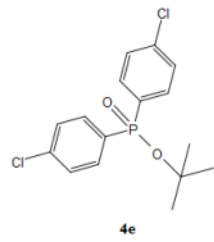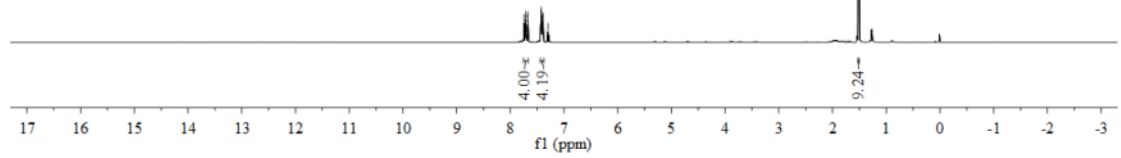

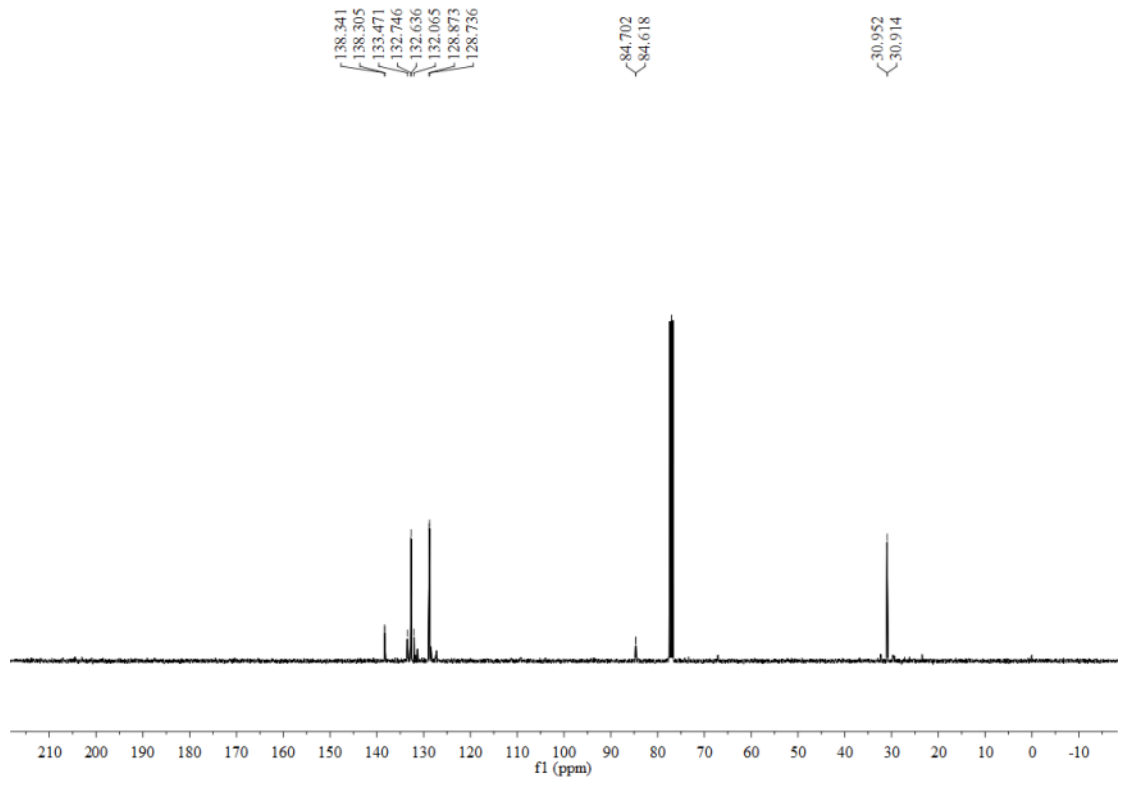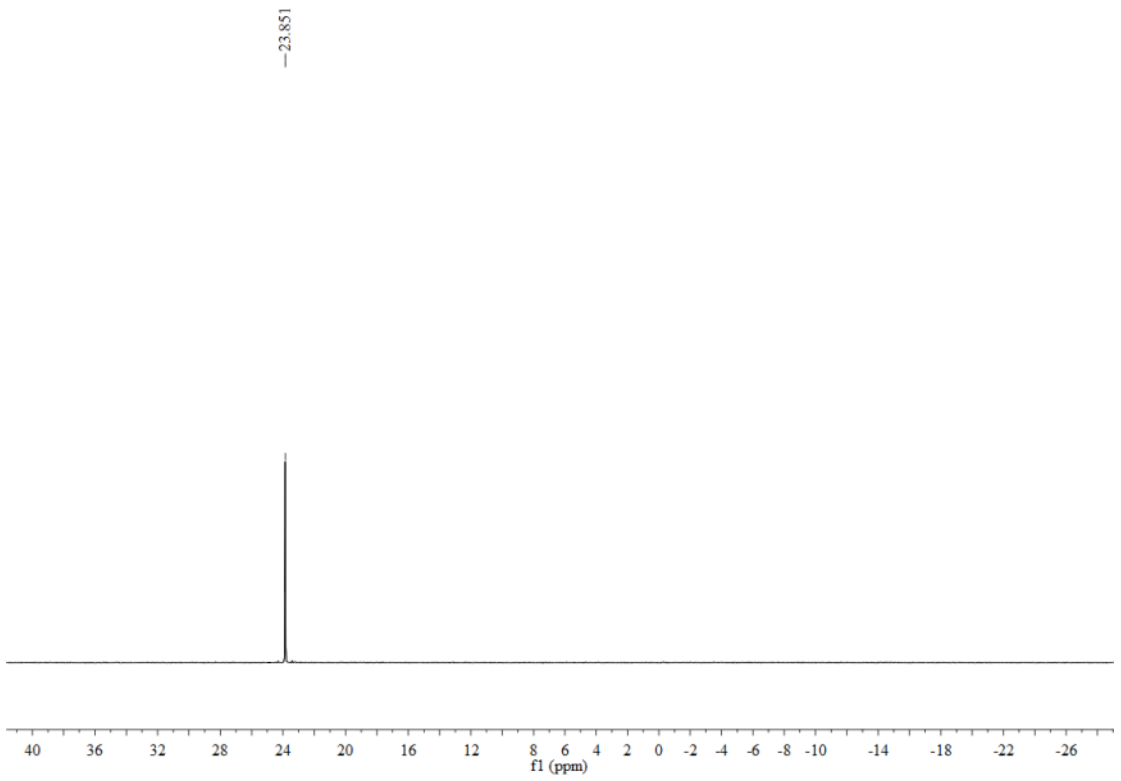

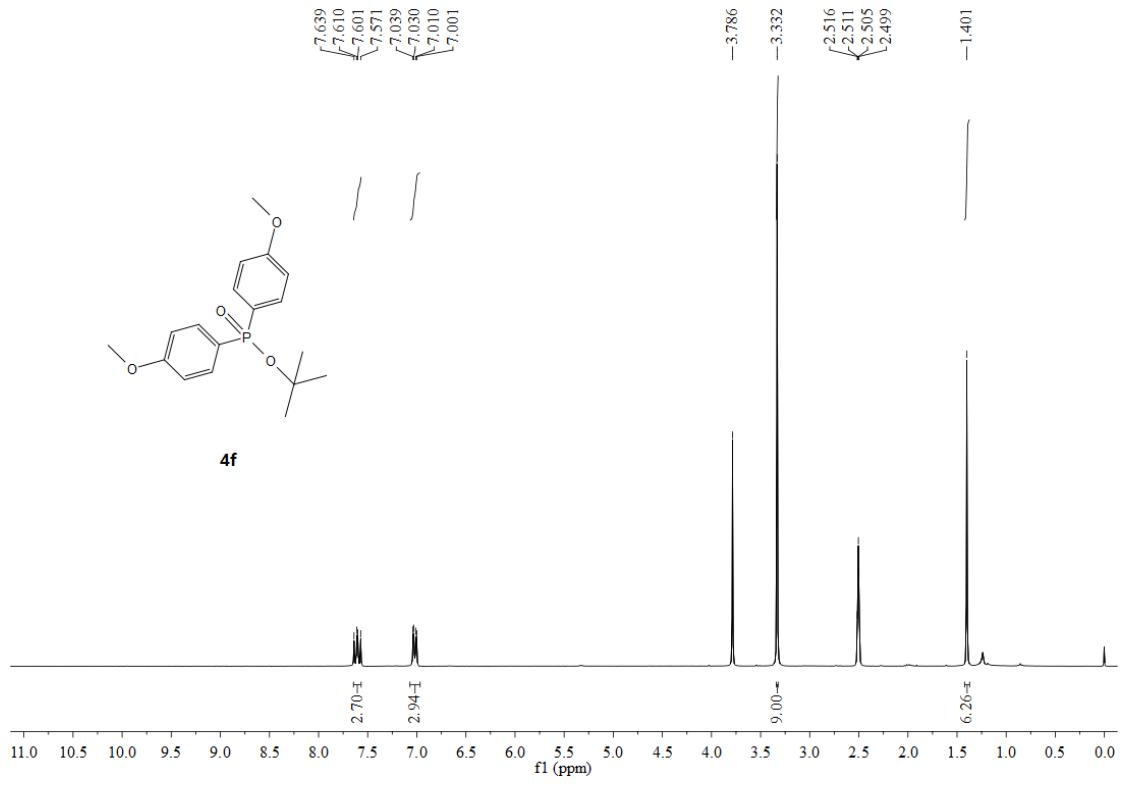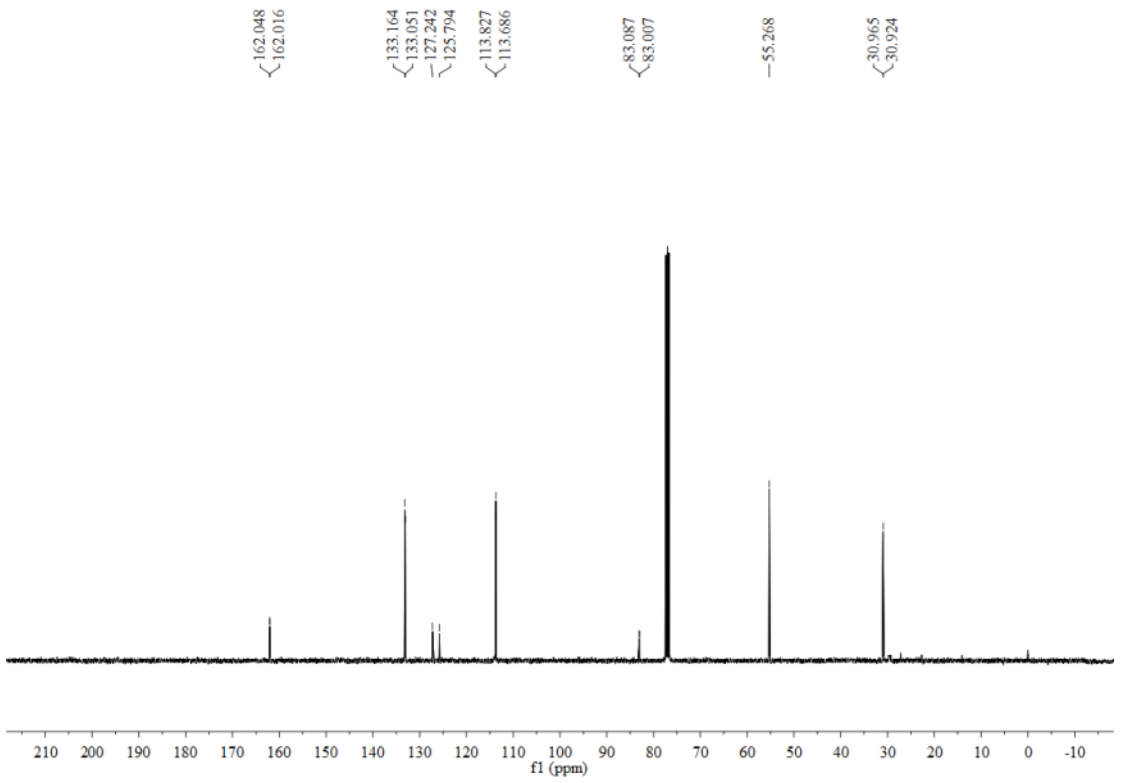

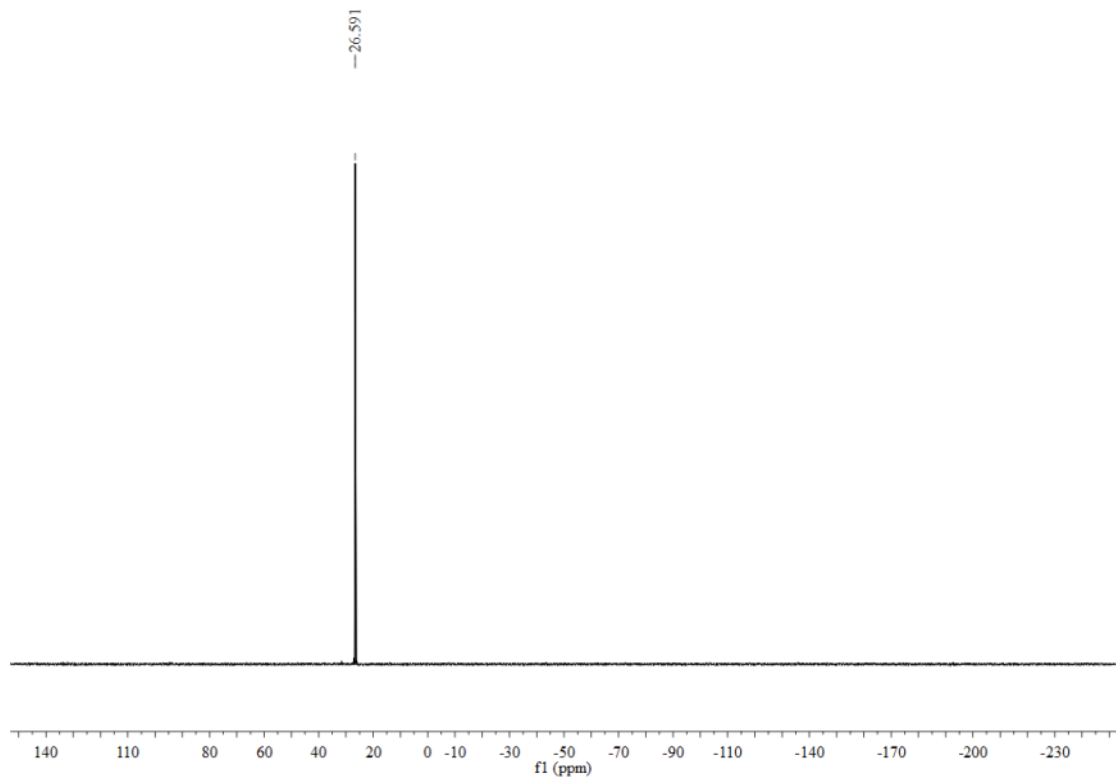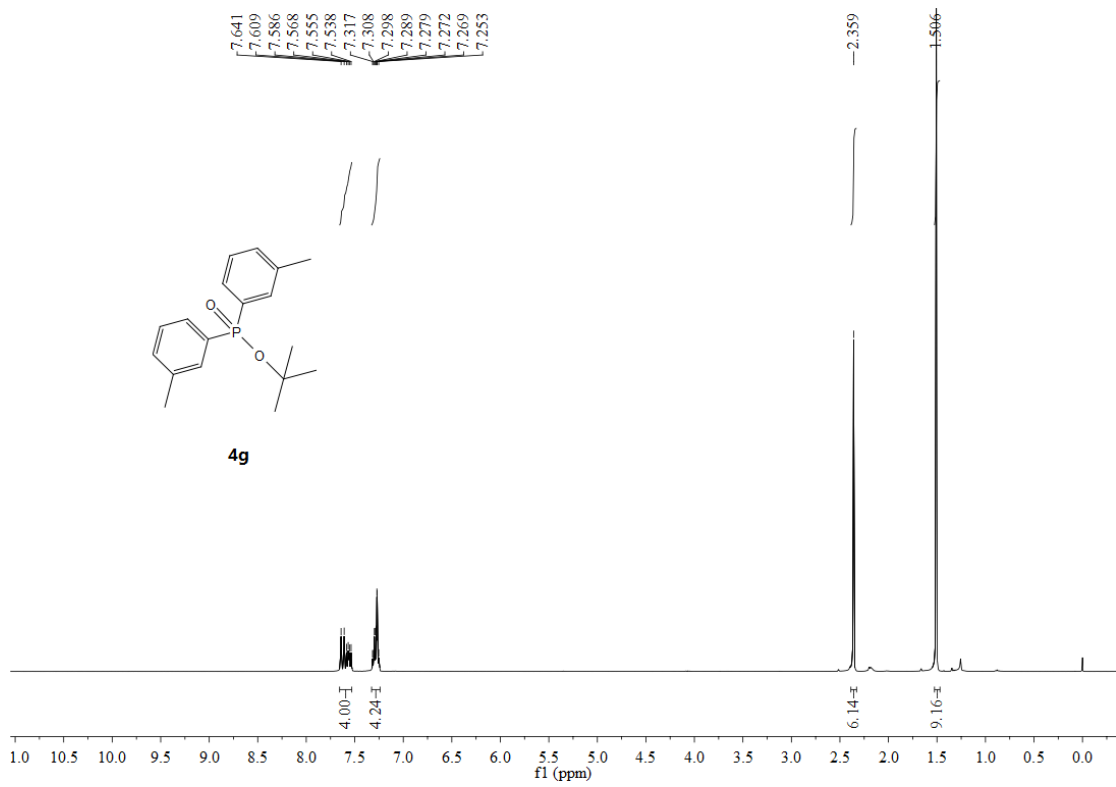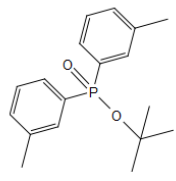

4g

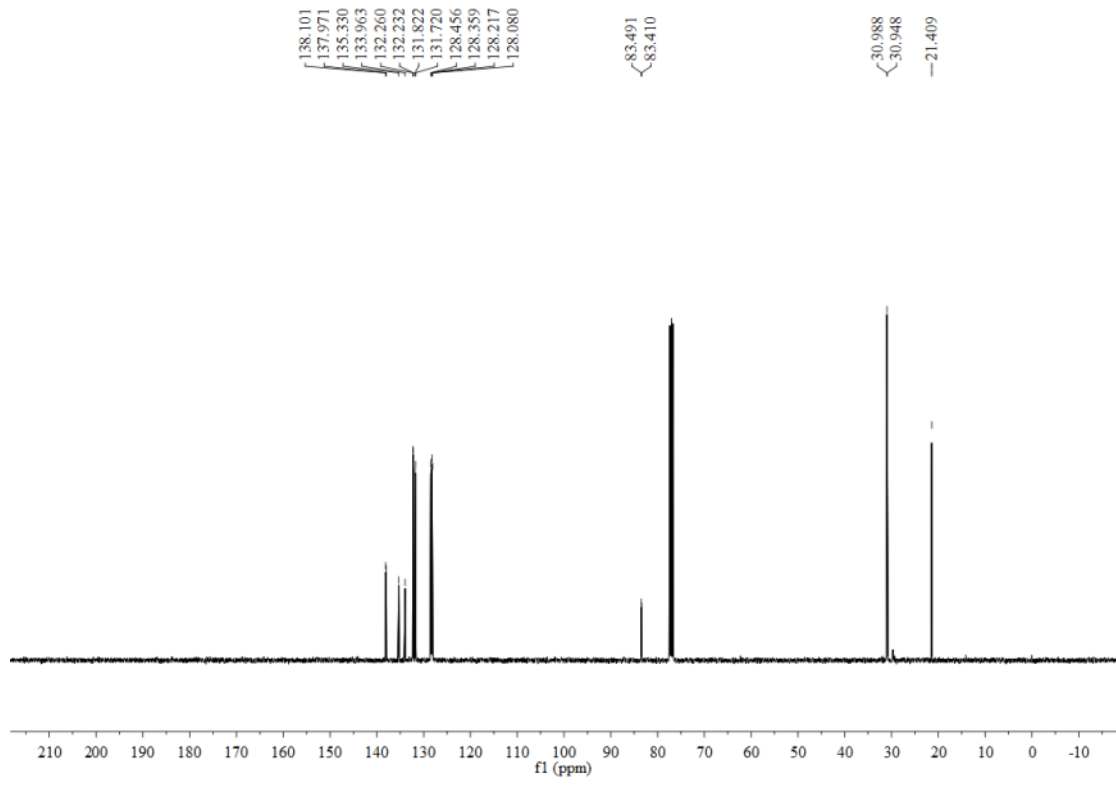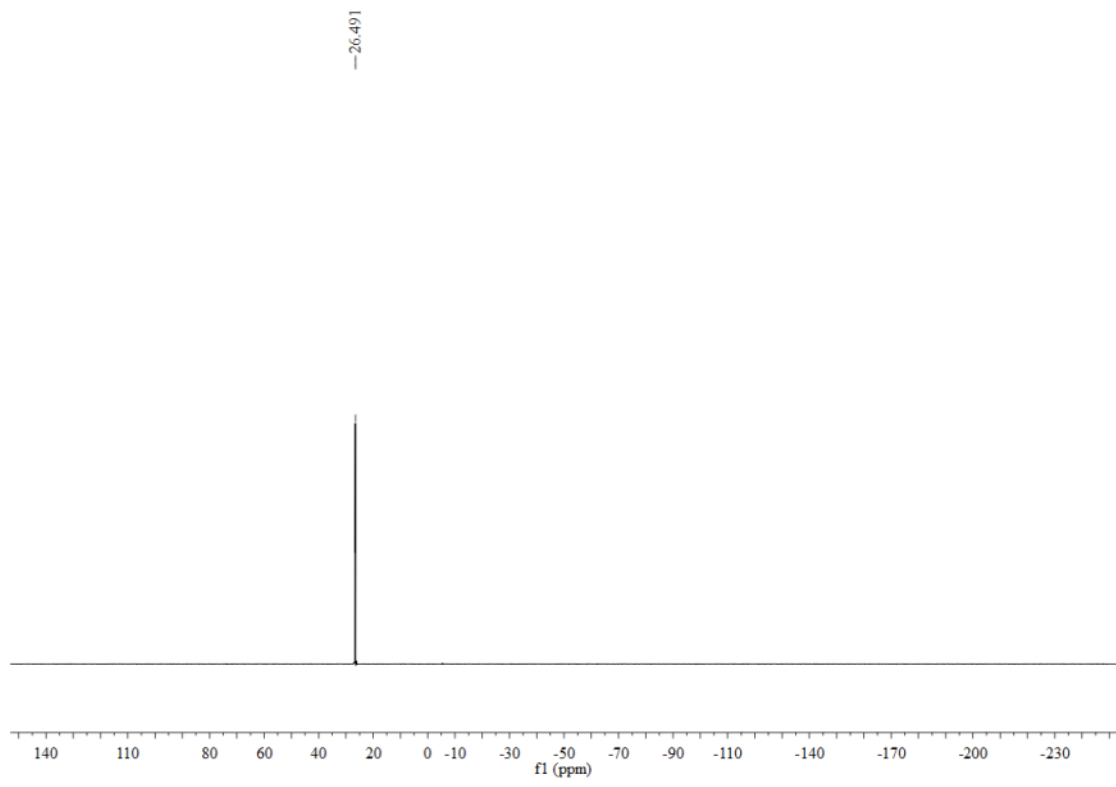

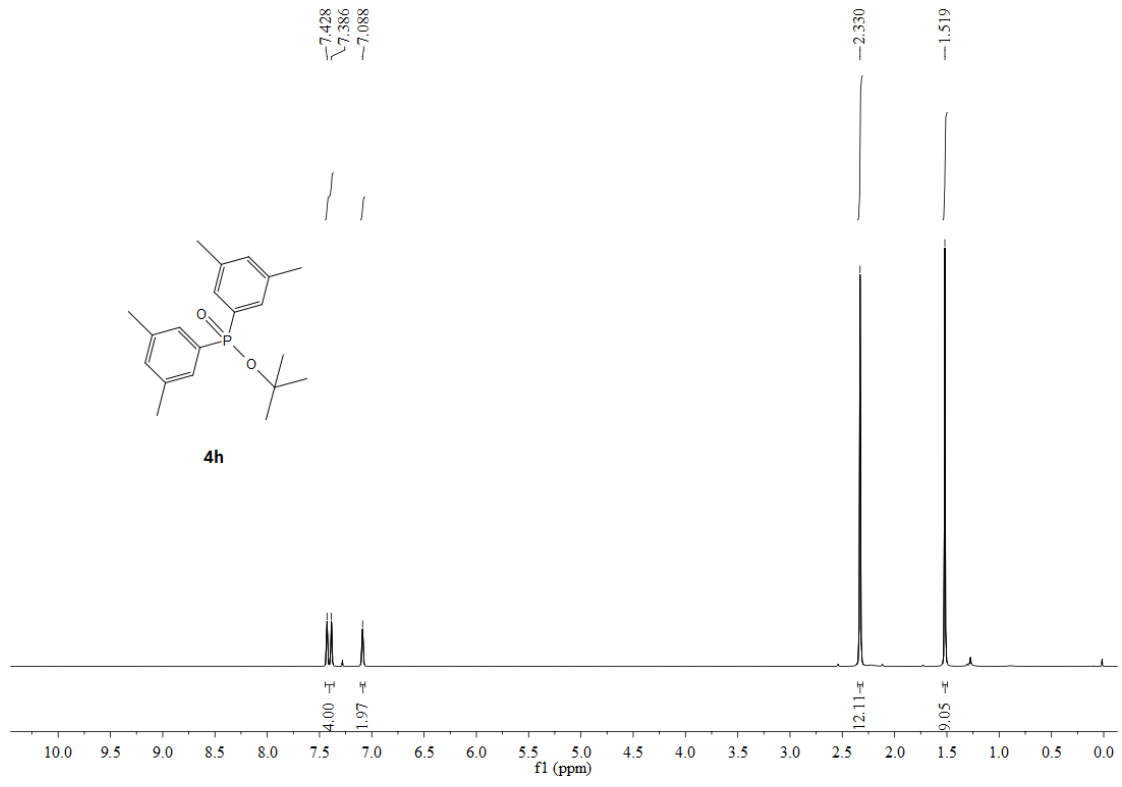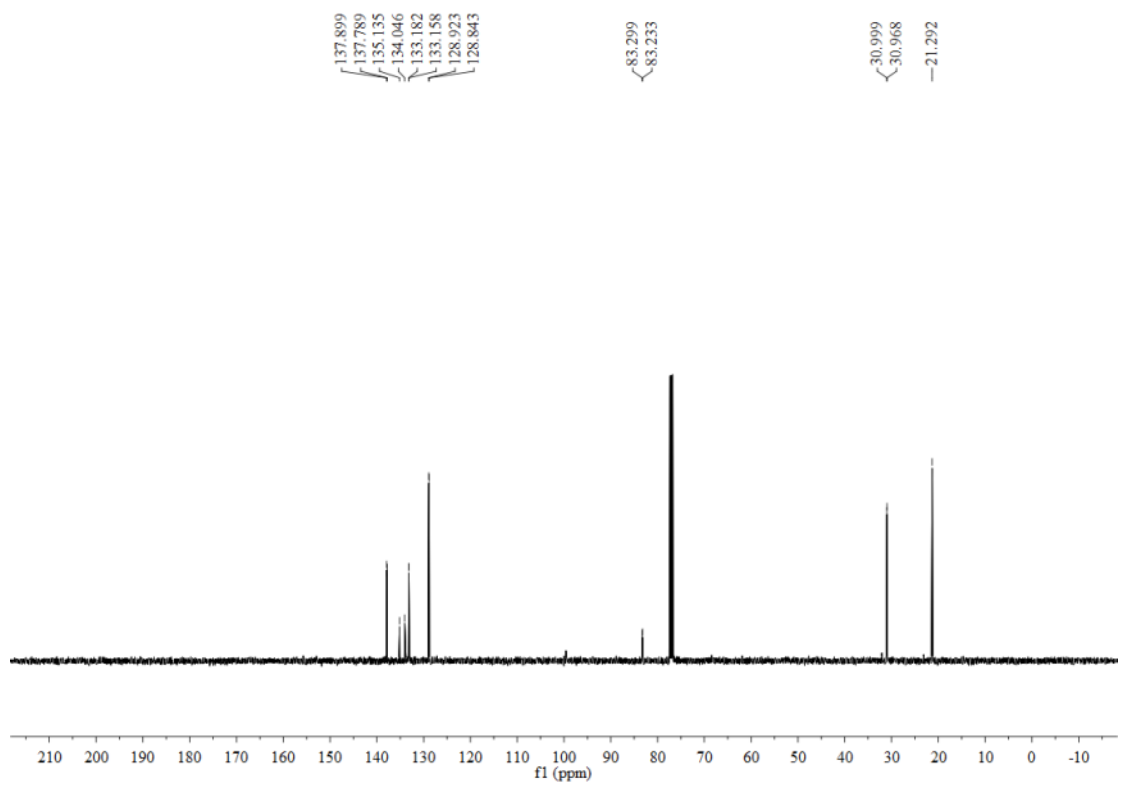

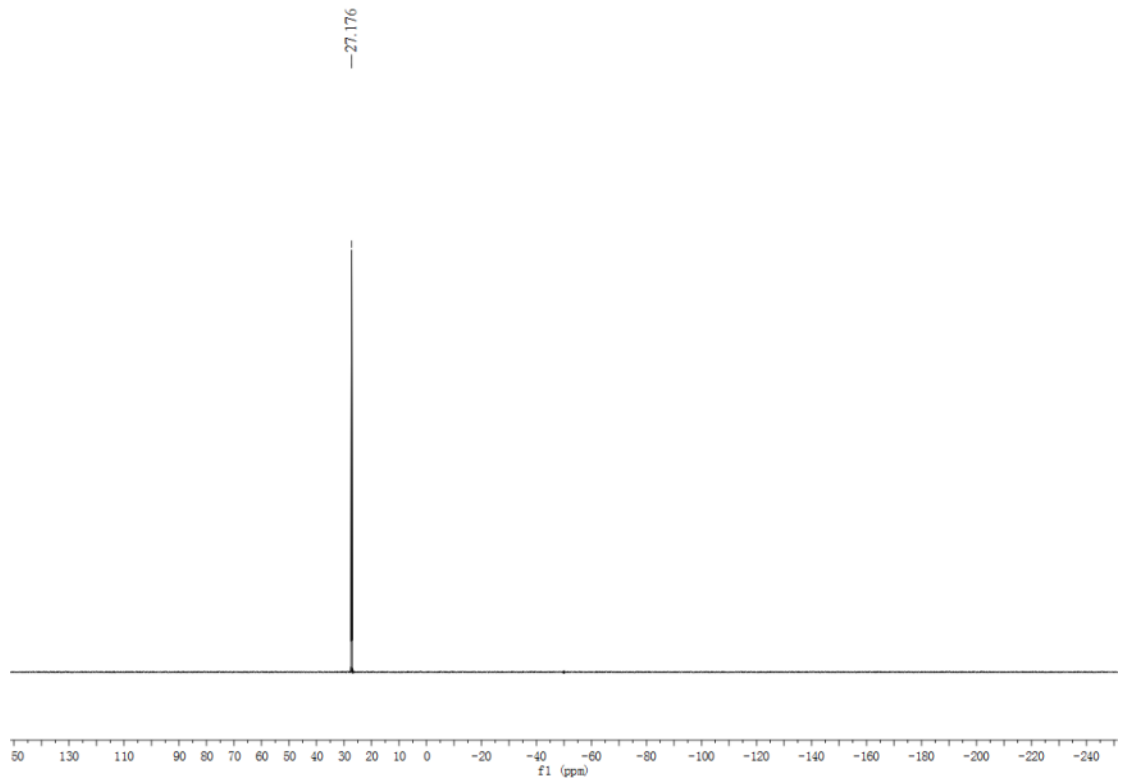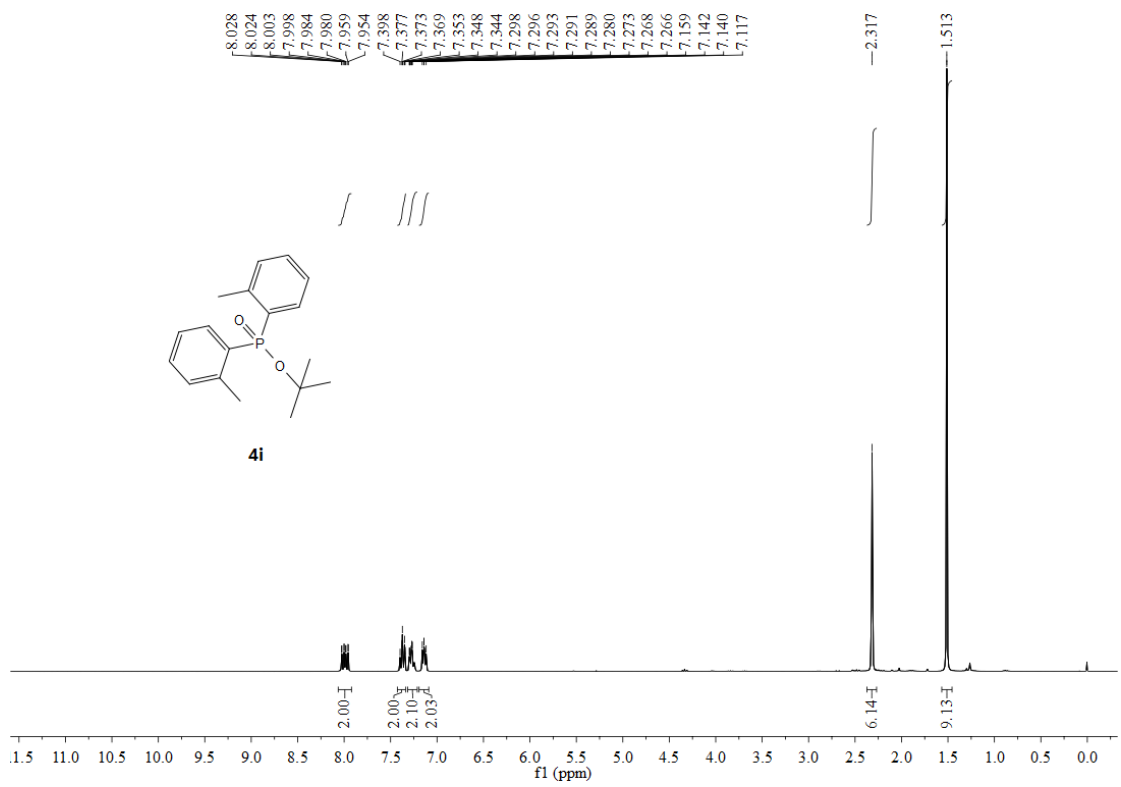

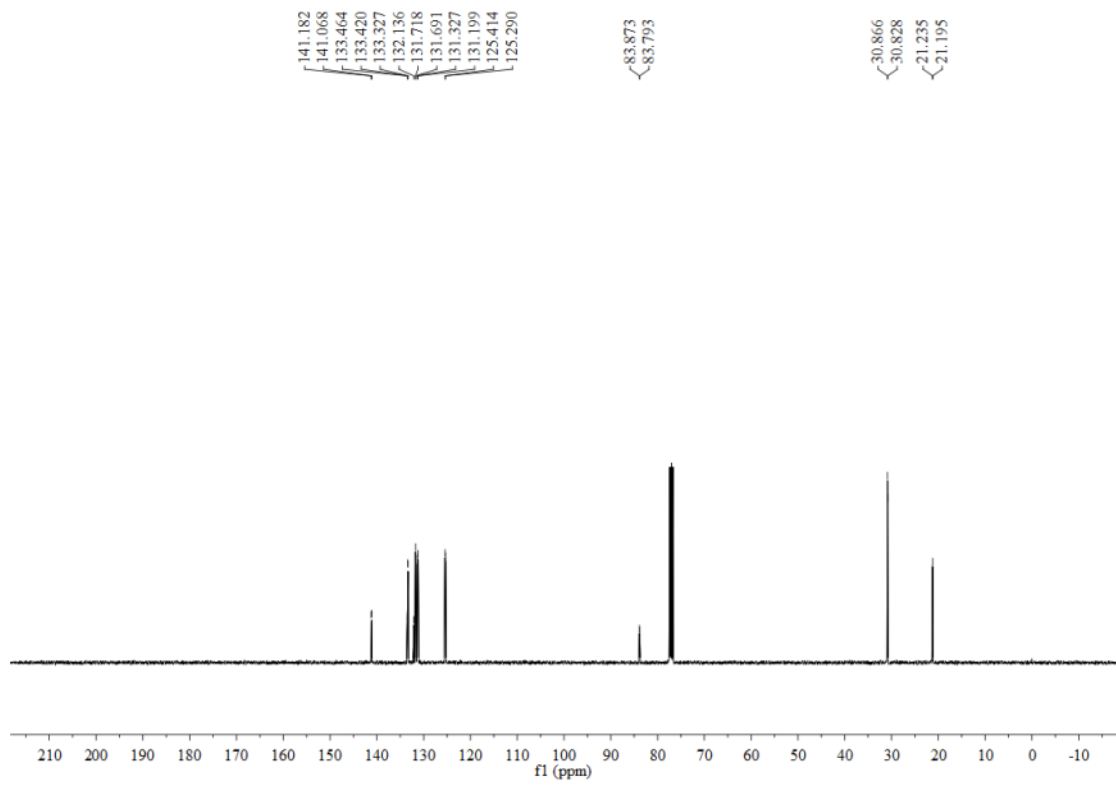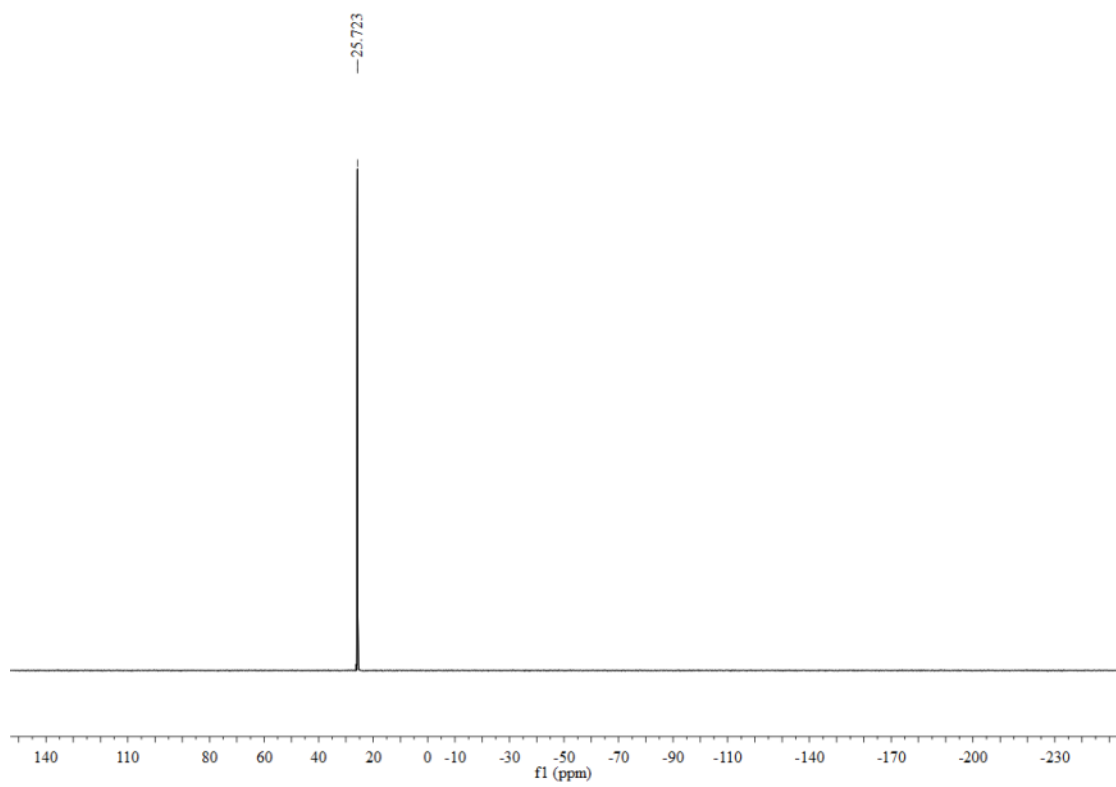



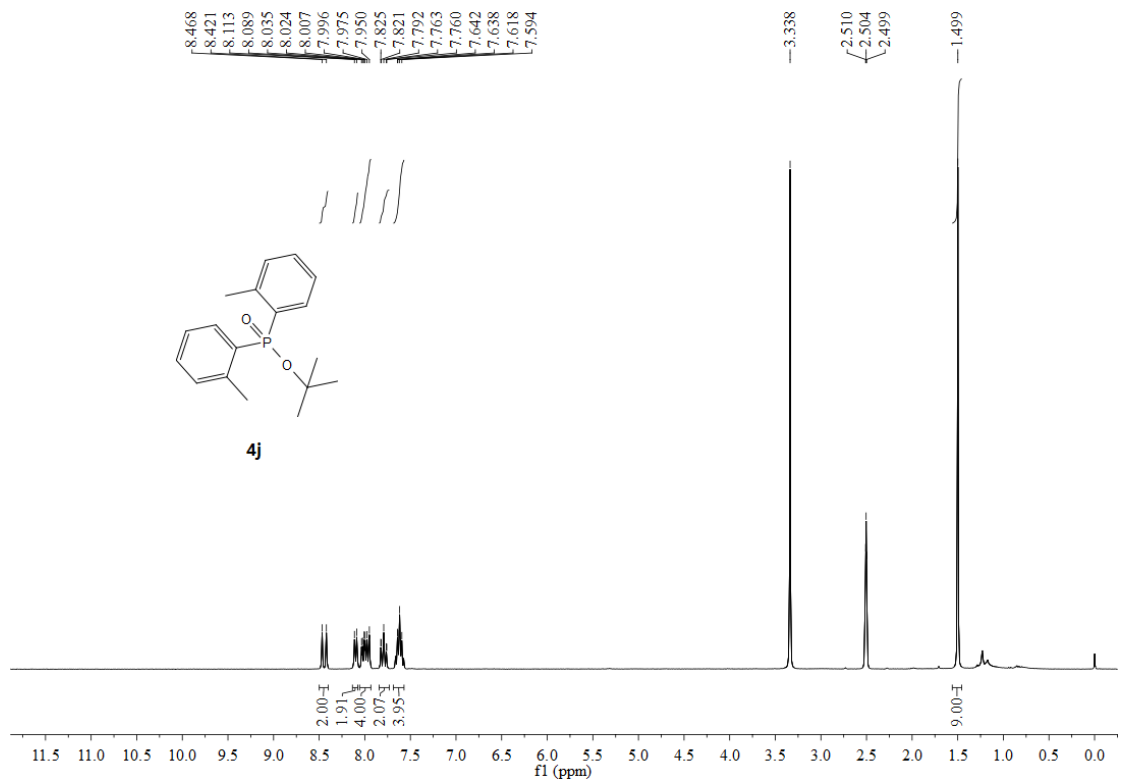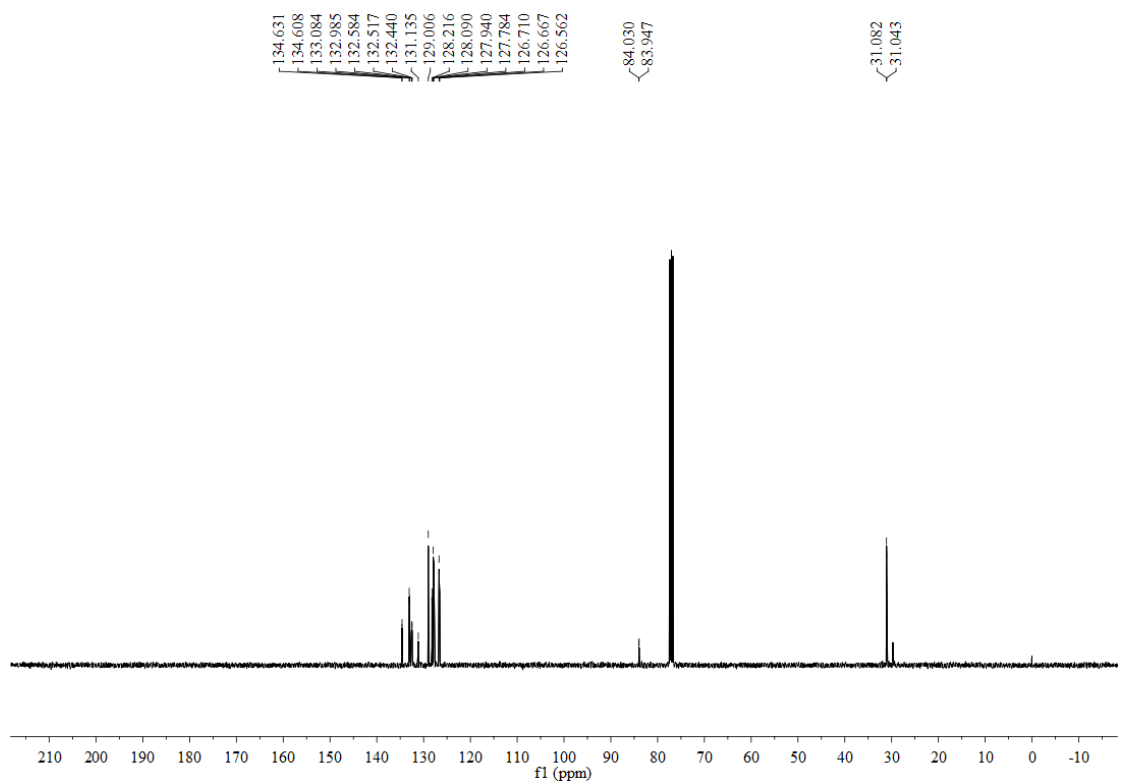

-25.958

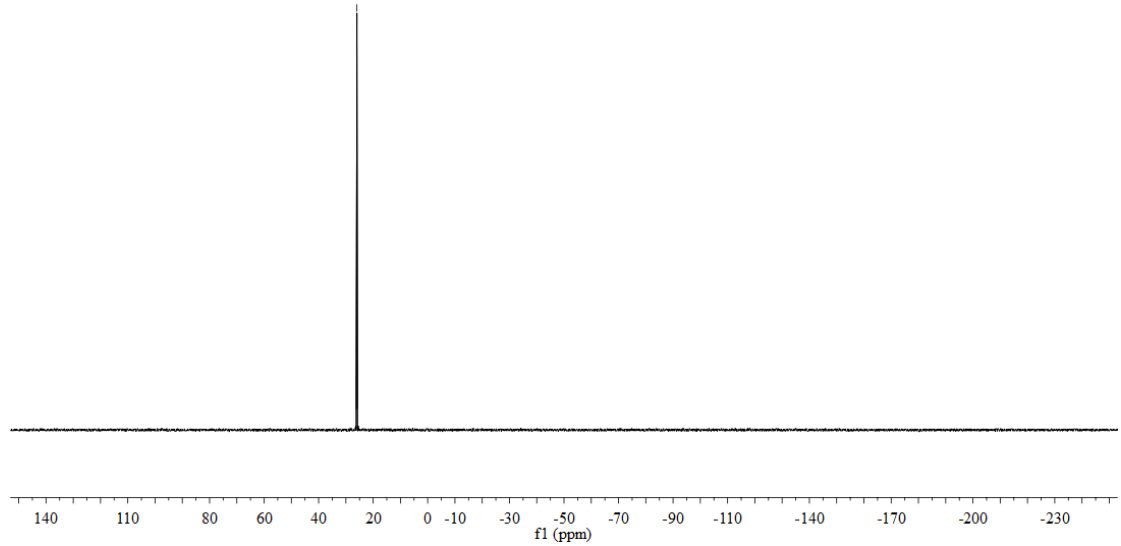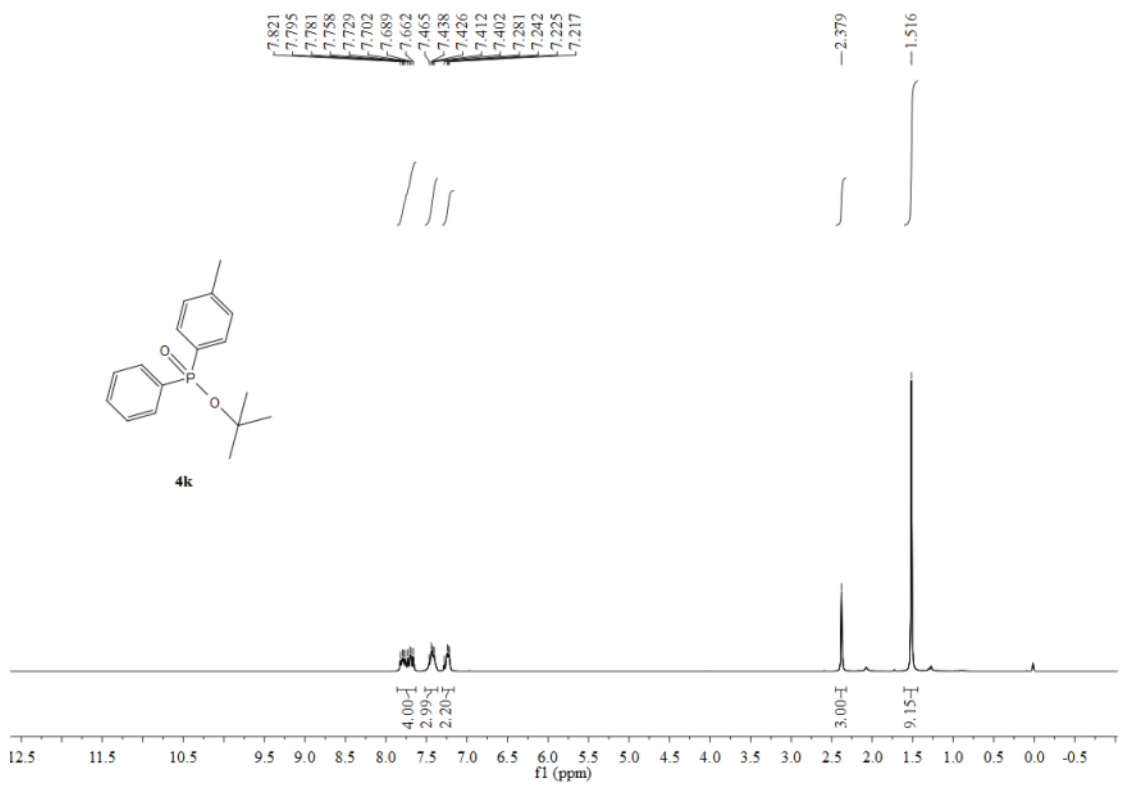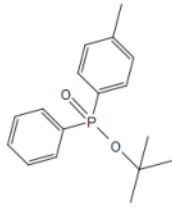

4k

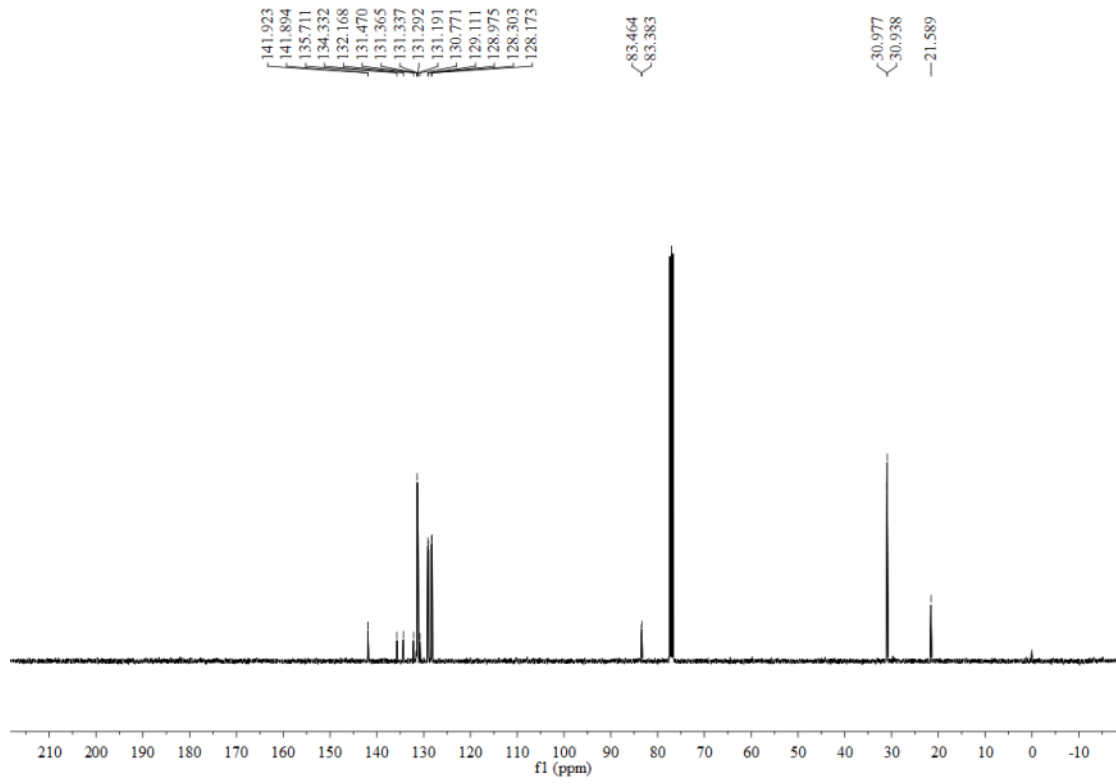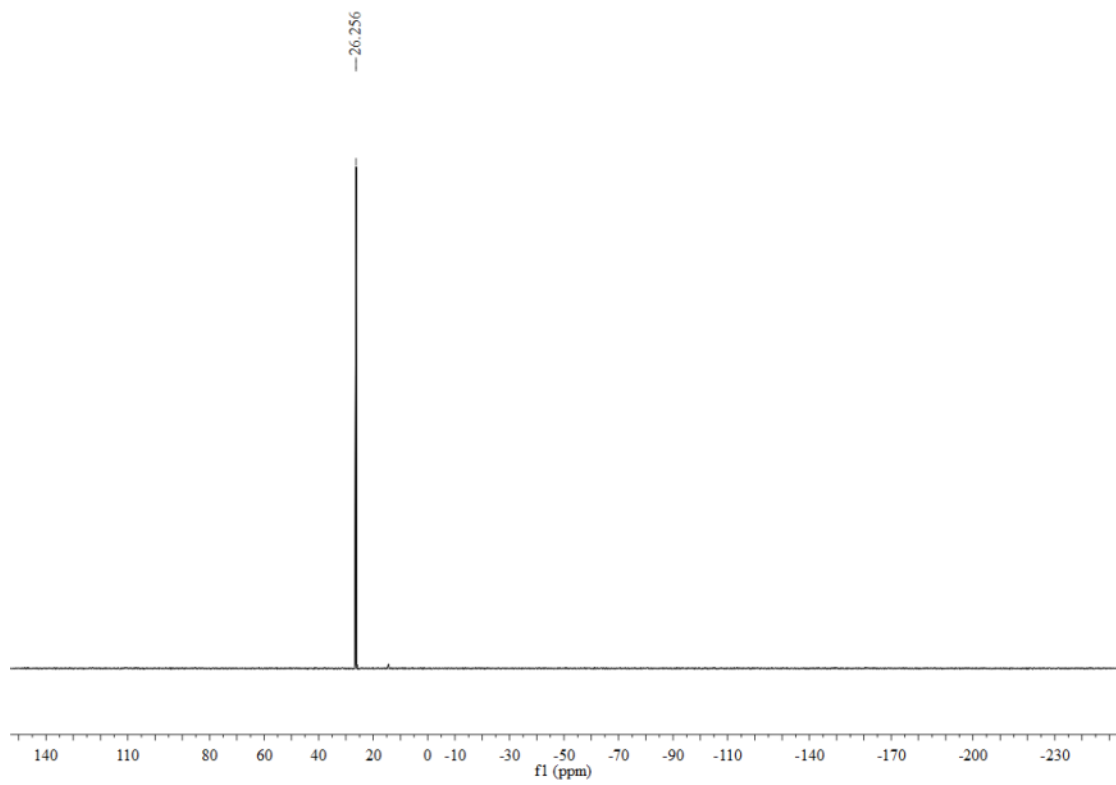

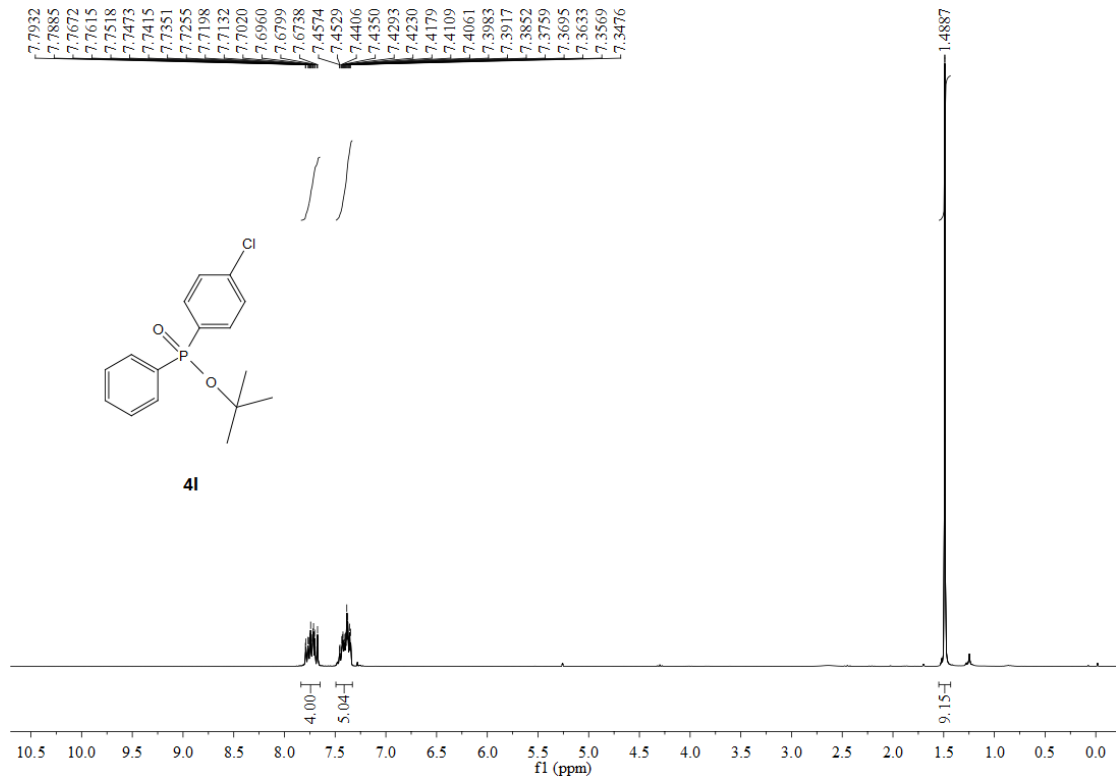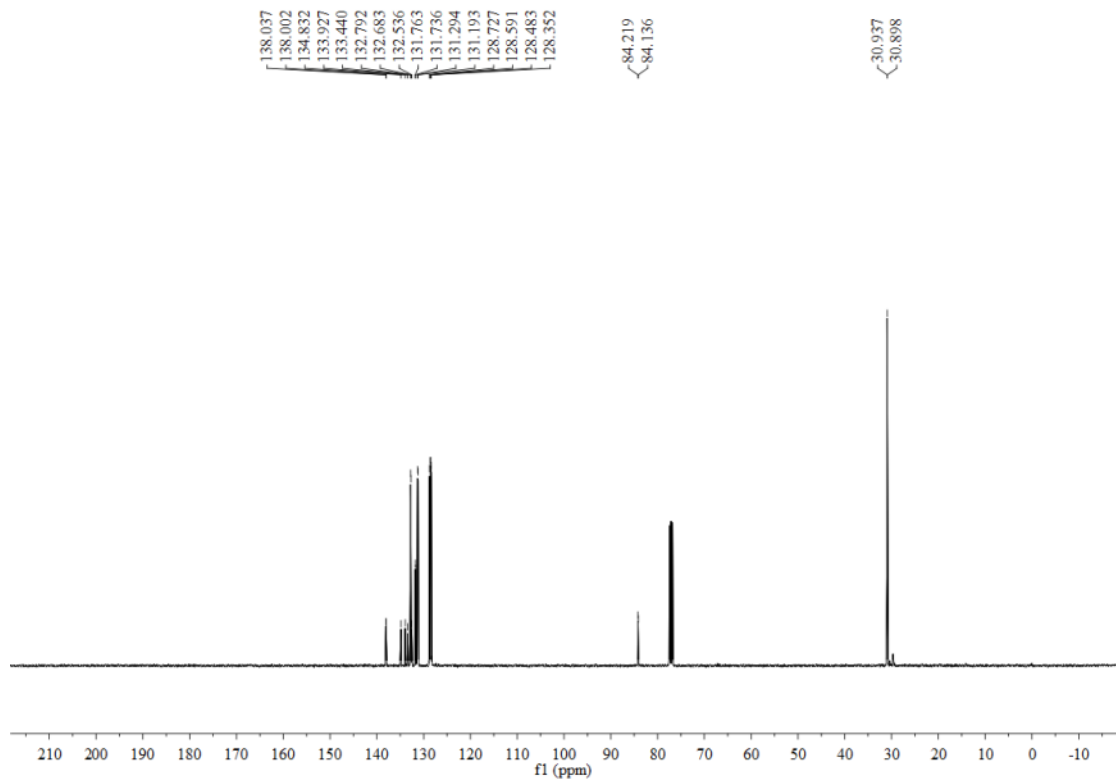

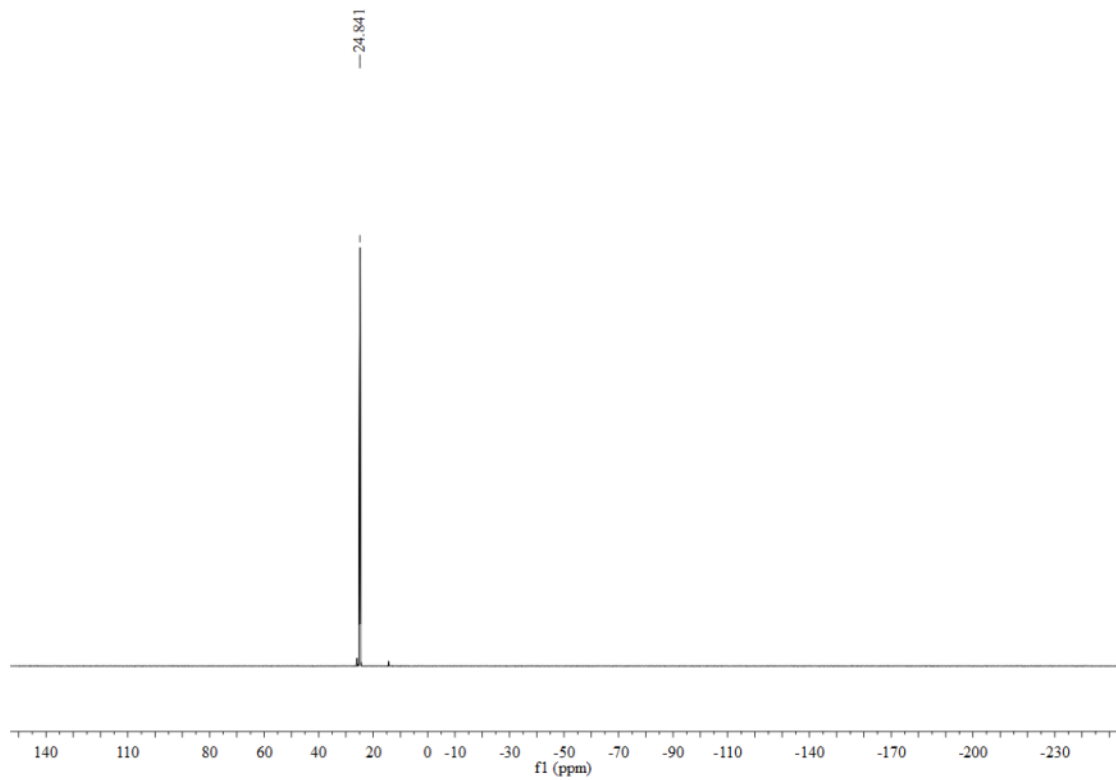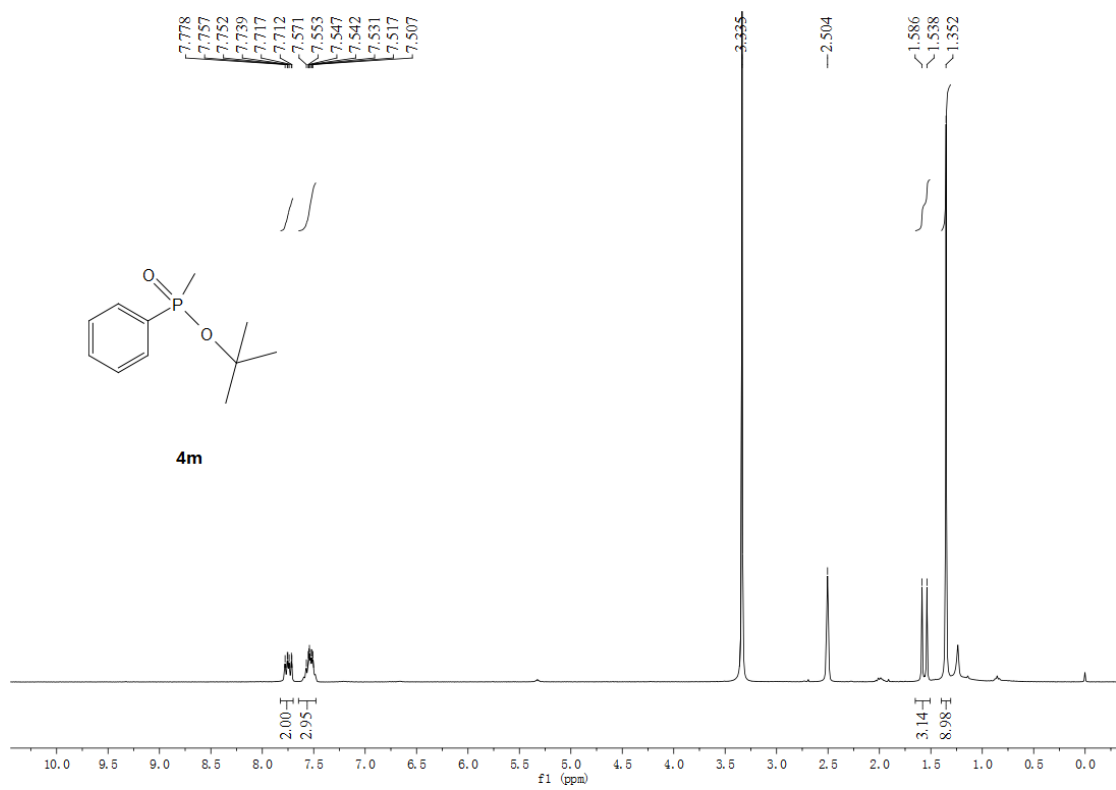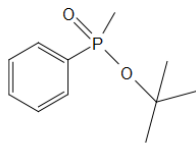

4m

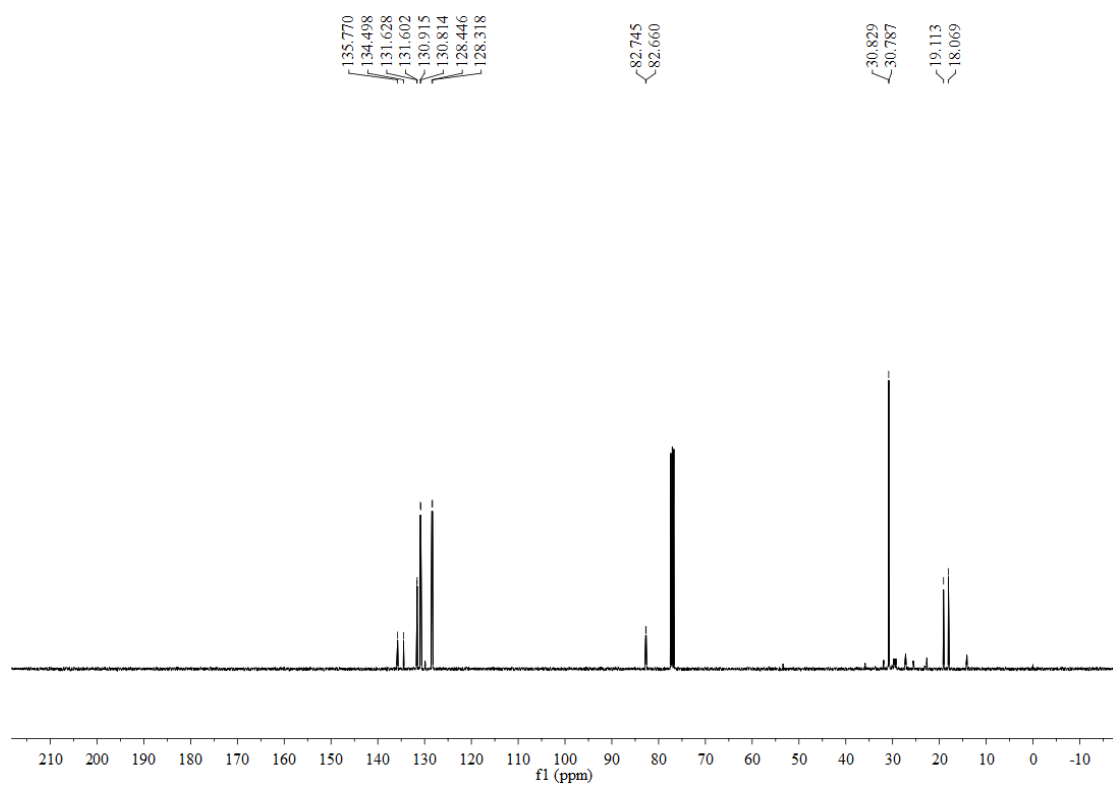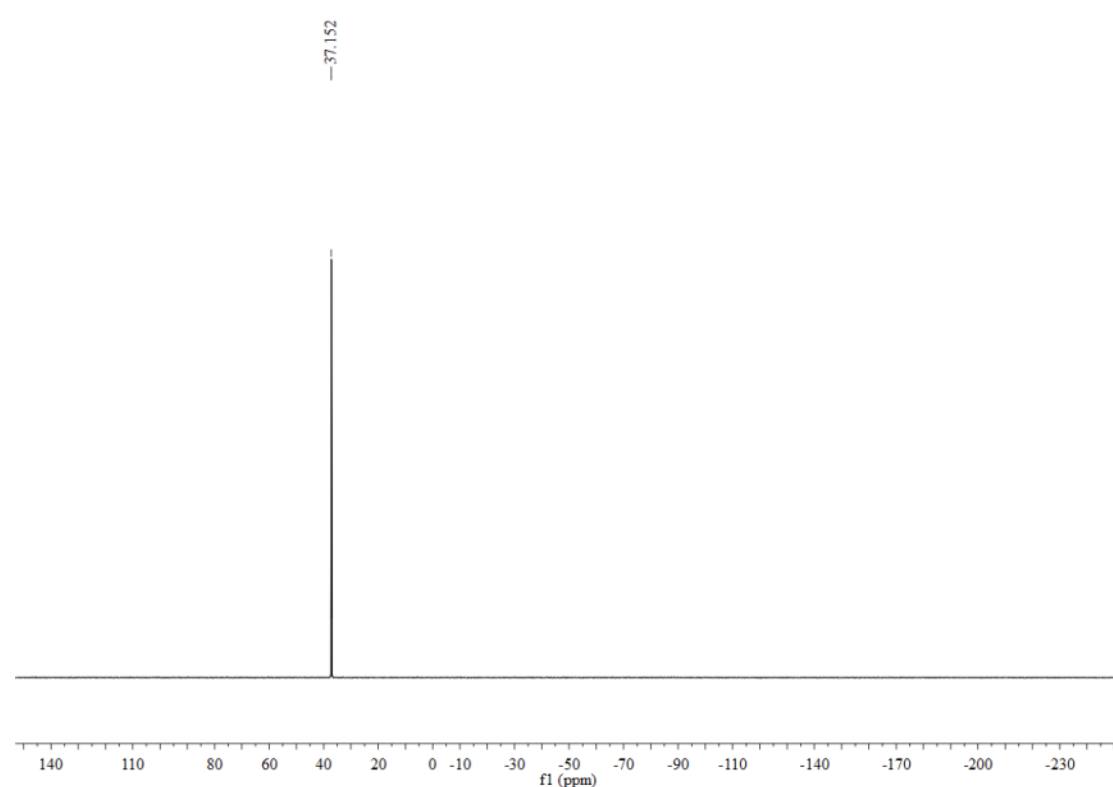

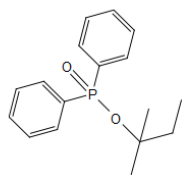

4o

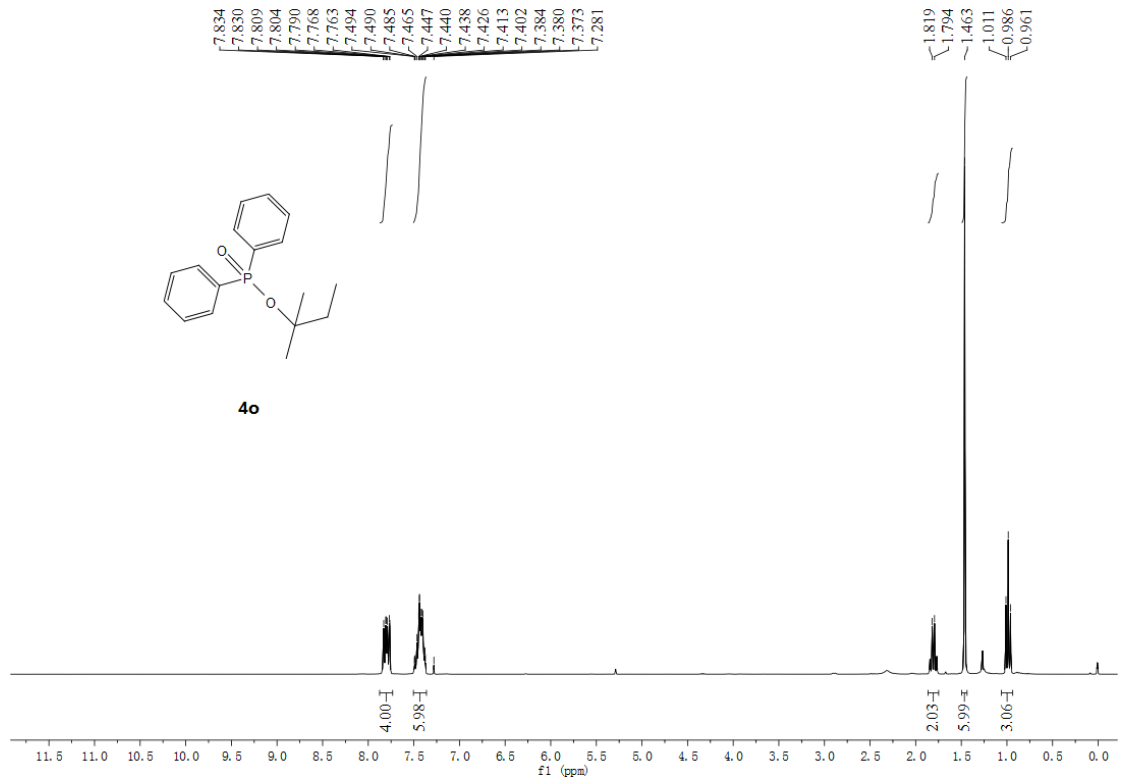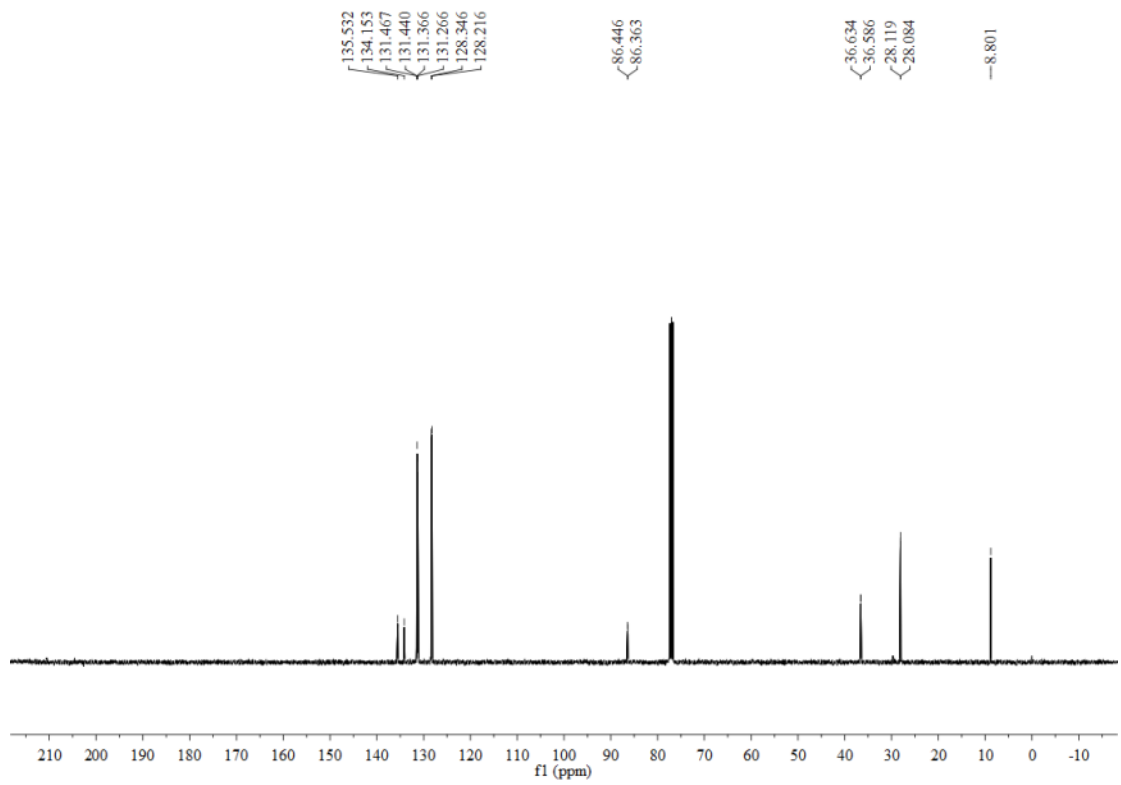

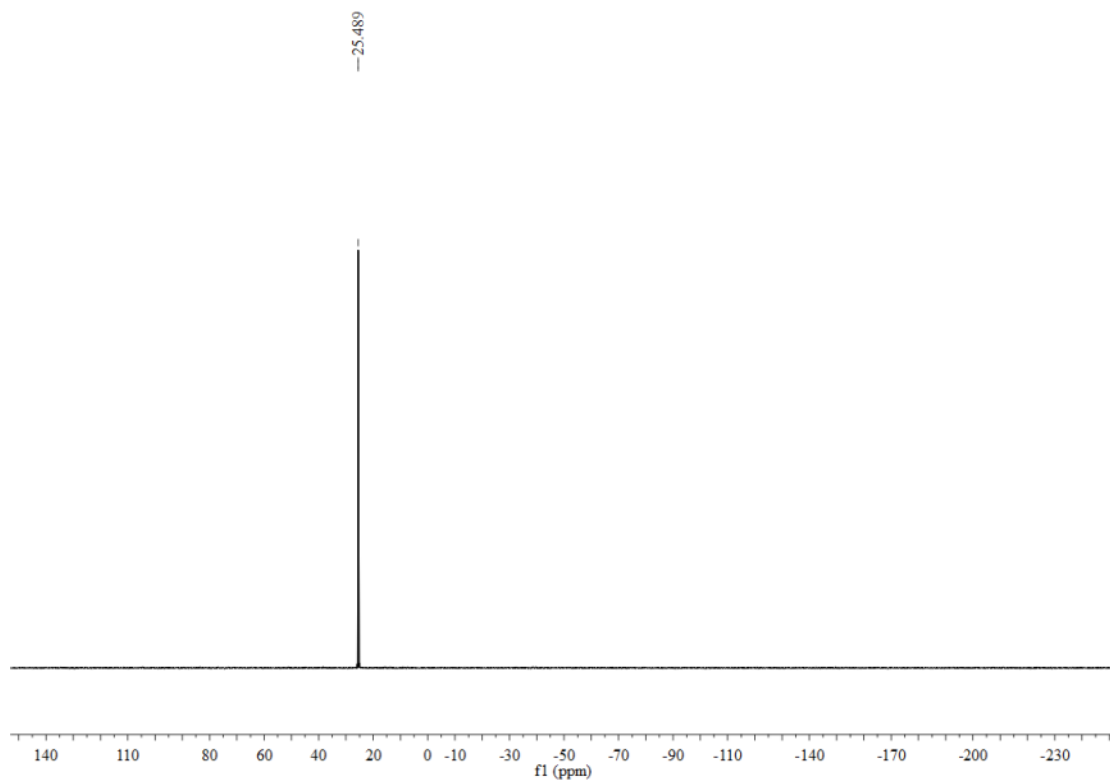

Supplement: d1qo00542a1.pdf [file d1qo00542a1.pdf]
